# Supplementary material for: Structure of massively dilatant faults in Iceland: lessons learned fromhigh resolution UAV data
Source: Copernicus journal article supplement (doi:10.5194/se-2019-117), 2019-06-27
Supplement: Supplementary file 1 [file S1.pdf › Supplement Weismueller et al/Supplementary figures/S1.pdf]

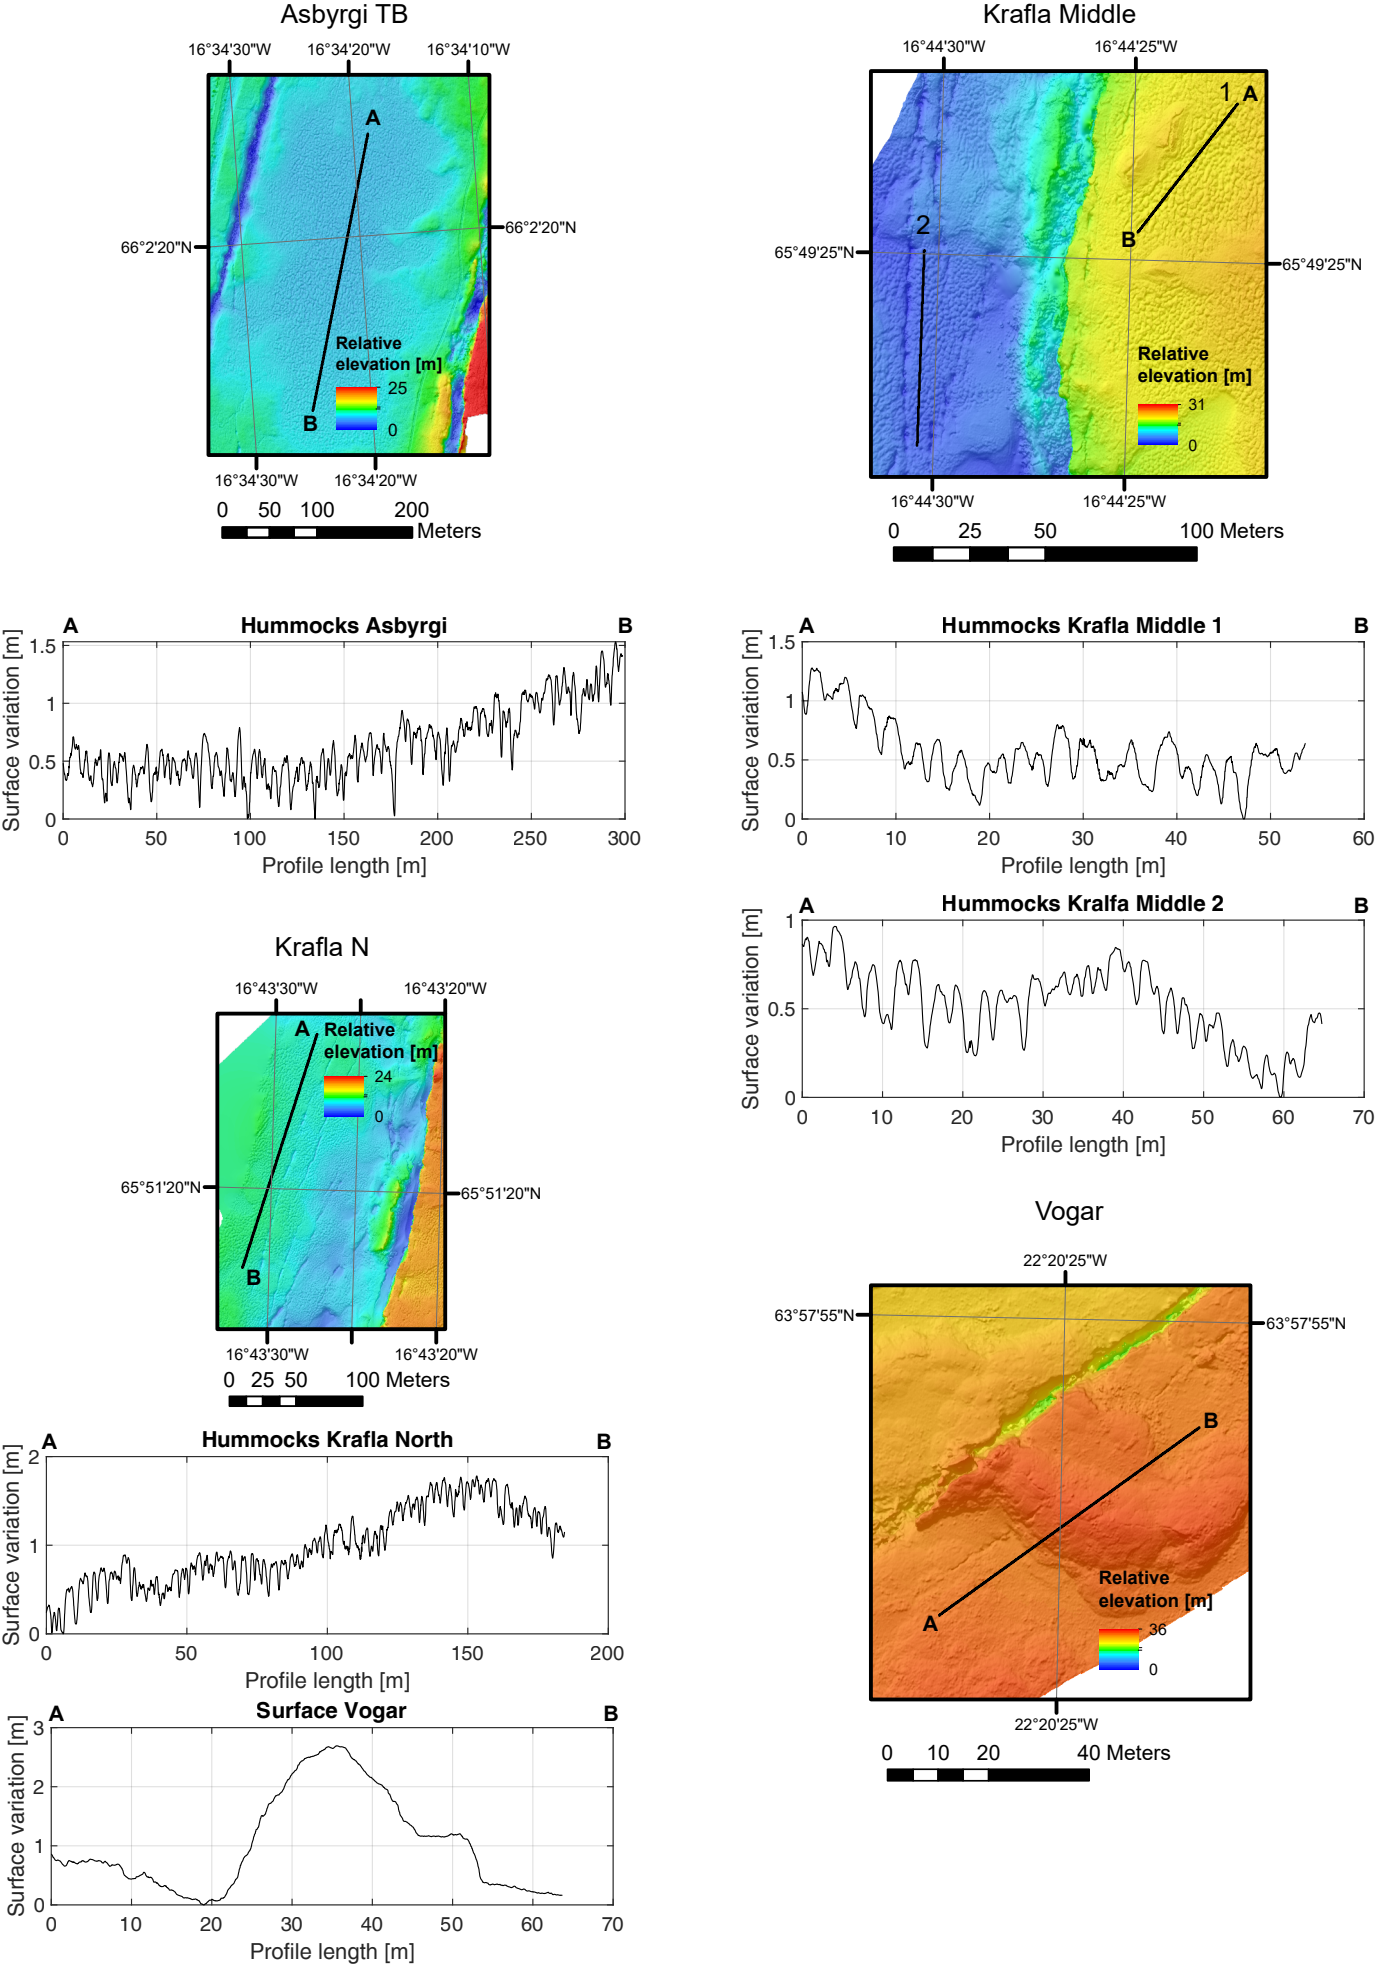

S1: Surface variations (roughness) for different DEMs. Hummocks cause surface variations < 1m, however maximum local changes caused by e.g. lava tubes may reach 2 m (Vogar)
