# Supplementary material for: Structure of massively dilatant faults in Iceland: lessons learned fromhigh resolution UAV data
Source: Copernicus journal article supplement (doi:10.5194/se-2019-117), 2019-06-27
Supplement: Supplementary file 1 [file Supplementary data.xlsx]

## Sheet: Sheet1
Measurements of opening width and vertical offset are sorted along strike, together with their endmember, according to their associated scanline.
Area name		Asbyrgi cigc				Asbyrgi FF				Asbyrgi FT				Asbyrgi Relay E				Asbyrgi TB				Krafla N				Krafla middle				Theistareykir				Thingvellir				Vogar N				Vogar S
GPS		16°35’14”W 66°01’21”N				16°37‘46“W 66°2‘57“N				16°34‘47“W 66°1‘27“N				16°37‘58“W 66°2‘32“N				16°34‘37“W 66°2‘23“N				16°43’21”W 65°51’19”N				16°44‘27“W 65°49‘22“N				17°00’23”W 65°50’45”N				21°8’37”W 64°14’33”N				22°20’40”W 63°58’0”N				22°20’40”W 63°58’0”N
		Position [m]	Vertical offset [m]	Opening width [m]	Endmember type	Position [m]	Vertical offset [m]	Opening width [m]	Endmember type	Position [m]	Vertical offset [m]	Opening width [m]	Endmember type	Position [m]	Vertical offset [m]	Opening width [m]	Endmember type	Position [m]	Vertical offset [m]	Opening width [m]	Endmember type	Position [m]	Vertical offset [m]	Opening width [m]	Endmember type	Position [m]	Vertical offset [m]	Opening width [m]	Endmember type	Position [m]	Vertical offset [m]	Opening width [m]	Endmember type	Position [m]	Vertical offset [m]	Opening width [m]	Endmember type	Position [m]	Vertical offset [m]	Opening width [m]	Endmember type	Position [m]	Vertical offset [m]	Opening width [m]	Endmember type
Endmembers:		1	0.0859375	1.8663	2	1	3.60989	8.80577	4	1	8.98604	5.14968	3	1	4.78969	12.2109	4	1	15.4338	12.6973	4	1	3.6969	14.86	4	1	17.1038	7.42439	4	1	4.06067	11.1804	4	1	3.65625	3.76891	4	1	0.171881	0.693843	2	1	5.94834	6.10219	3
No opening DF: 1		2	0.28511	2.25087	2	2	3.73208	8.51421	4	2	8.79875	4.68328	3	2	5.03459	11.8618	4	2	15.5936	13.8019	4	2	3.90952	14.853	4	2	17.1853	8.2756	4	2	4.14993	12.2028	4	2	3.70708	4.03613	4	2	0.583933	1.31843	2	2	5.83032	6.41234	3
Fissure: 2		3	0.0626068	1.23662	2	3	3.64992	9.18633	4	3	8.98957	3.56097	3	3	4.9576	11.3268	4	3	15.5449	13.4814	4	3	3.86957	14.639	4	3	17.1294	8.52916	4	3	4.27509	10.9705	4	3	3.98817	5.56013	4	3	0.445902	1.36876	2	3	5.82769	6.01762	3
DF: 3		4	0.0062027	1.20286	2	4	3.86604	11.0111	4	4	9.17761	3.74652	3	4	4.40251	10.8542	4	4	15.3881	13.8657	4	4	4.04956	14.215	4	4	17.0725	8.37055	4	4	4.20782	13.1314	4	4	3.22531	6.05976	4	4	0.612484	1.95412	2	4	5.97792	5.37378	3
TB: 4		5	0.205933	0.910966	2	5	3.88036	11.1532	4	5	9.16939	5.75589	3	5	4.22168	10.3566	4	5	15.2268	13.574	4	5	4.22784	13.7911	4	5	17.1341	8.40049	4	5	4.24847	13.3559	4	5	3.02495	7.301	4	5	0.939312	2.1	2	5	6.16461	4.49744	3
		6	0.543633	1.18057	2	6	3.8032	11.5465	4	6	9.10689	5.57287	3	6	4.44367	9.98834	4	6	15.3384	13.0216	4	6	4.32401	13.4895	4	6	17.0101	8.29652	4	6	4.37354	11.3381	4	6	3.32341	7.45516	4	6	1.32201	2.33699	2	6	6.52564	5.31744	3
		7	0.73999	0.864441	2	7	3.43937	10.4979	4	7	9.0007	5.6099	3	7	4.28378	10.2228	4	7	15.0104	12.6055	4	7	4.74026	13.5156	4	7	16.9867	8.30039	4	7	4.16183	10.9667	4	7	3.41768	6.25374	4	7	1.48466	2.08408	2	7	6.77399	5.59175	3
		8	0.805809	0.558058	2	8	3.39583	11.0463	4	8	9.30615	5.34869	3	8	4.14732	10.3914	4	8	15.0249	12.7651	4	8	5.04846	13.9109	4	8	16.9617	8.11832	4	8	4.14465	11.3786	4	8	3.40588	4.71783	4	8	1.62259	1.84102	2	8	6.87354	4.776	3
		9	0.725159	1.21055	2	9	2.87783	9.72925	4	9	9.40308	5.24121	3	9	4.02525	10.7952	4	9	15.1347	13.2247	4	9	5.19891	14.3039	4	9	16.6263	7.8912	4	9	4.27371	11.8557	4	9	3.25415	4.15414	4	9	1.54814	1.88297	2	9	7.15604	4.51019	3
		10	0.887192	0.735819	2	10	2.44876	11.9349	4	10	9.22836	5.45311	3	10	3.92952	10.34	4	10	14.8217	12.9837	4	10	5.3298	14.4073	4	10	16.2843	8.01258	4	10	4.02121	10.4756	4	10	3.52129	5.08974	4	10	1.43735	1.25504	2	10	7.06495	4.56974	3
		11	0.734032	0.521175	2	11	2.84897	12.3629	4	11	9.54589	5.52666	3	11	3.84245	10.2671	4	11	15.0484	12.4187	4	11	5.4393	14.5445	4	11	15.8878	8.23092	4	11	3.76697	9.98122	4	11	3.40804	6.6204	4	11	0.962372	1.21406	2	11	7.1642	4.60183	3
		12	0.451553	0.982936	2	12	2.92288	12.3929	4	12	9.33532	5.4073	3	12	3.88367	10.572	4	12	15.2385	12.5038	4	12	5.58588	14.9878	4	12	15.6631	8.49214	4	12	3.71298	11.6193	4	12	3.35881	7.48016	4	12	0.787642	1.75176	2	12	7.16655	4.17276	3
		13	0.144661	0.628309	2	13	3.60265	12.5542	4	13	9.26263	6.19658	3	13	3.79329	10.2536	4	13	15.0472	12.1713	4	13	5.7558	15.4851	4	13	15.5533	8.6224	4	13	3.66495	11.8917	4	13	3.2515	8.90762	4	13	0.541306	1.72747	2	13	7.25947	4.07236	3
		14	0.383133	0.495943	2	14	3.26868	12.6326	4	14	9.33417	6.44231	3	14	4.1722	9.73182	4	14	15.1536	11.506	4	14	5.79501	15.9825	4	14	15.509	8.57705	4	14	3.68625	14.2963	4	14	3.53954	9.50182	4	14	0.415518	1.81696	2	14	7.24048	4.02381	3
		15	0.539673	0.903727	2	15	2.25638	10.0684	4	15	9.78603	5.45361	3	15	4.28969	9.90334	4	15	15.1762	11.582	4	15	5.9375	16.2284	4	15	15.3226	8.10526	4	15	3.42368	15.6835	4	15	3.47984	8.51466	4	15	0.099699	2.17608	2	15	7.14257	4.43236	3
		16	0.719177	0.518062	2	16	2.33836	9.27644	4	16	9.62621	4.61675	3	16	4.1263	10.1973	4	16	15.0657	11.0433	4	16	6.1767	16.4263	4	16	15.0313	8.14482	4	16	3.41986	17.5308	4	16	3.2661	7.42088	4	16	0.0122299	2.1356	2	16	6.65949	5.03026	3
		17	0.585861	0.492343	2	17	1.85163	10.0966	4	17	9.24963	4.55388	3	17	4.02618	10.461	4	17	15.1916	10.7024	4	17	5.89249	16.385	4	17	14.9863	8.65507	4	17	3.43219	18.3423	4	17	2.77786	7.54516	4	17	0.298321	1.68465	2	17	6.36225	4.70404	3
		18	0.552246	0.831153	2	18	1.93435	9.58354	4	18	9.47779	4.4807	3	18	4.50581	10.5057	4	18	15.2213	10.7628	4	18	5.68161	16.0446	4	18	15.2639	8.73147	4	18	3.38806	17.3591	4	18	2.95685	7.49613	4	18	0.324936	1.62094	2	18	6.15424	4.90664	3
		19	0.666031	0.663748	2	19	1.65051	9.12001	4	19	9.14433	4.56565	3	19	4.14903	10.5768	4	19	15.0577	10.3751	4	19	5.64075	15.7042	4	19	15.1197	8.59151	4	19	3.2612	17.2806	4	19	2.84615	7.79066	4	19	0.185282	0.592233	2	19	5.85037	4.16321	3
		20	0.859039	0.674356	2	20	1.39799	9.82705	4	20	8.95785	5.36496	3	20	4.0751	11.4323	4	20	15.0563	10.7924	4	20	5.33371	15.0714	4	20	15.1848	9.35868	4	20	2.92944	14.1648	4	20	2.89342	9.25113	4	20	0.145142	0.310958	2	20	5.80706	4.079	3
		21	1.00721	0.396416	2	21	1.12519	10.9108	4	21	9.04241	6.30713	3	21	4.27335	11.8632	4	21	15.0923	11.5152	4	21	5.26297	14.4819	4	21	14.942	9.42811	4	21	2.56351	13.3987	4	21	2.80223	9.80594	4	21	0.0217857	0.926626	2	21	6.03539	3.87445	3
		22	0.75058	0.583556	2	22	1.0306	10.3957	4	22	8.93806	6.92085	3	22	4.13602	11.6949	4	22	15.0184	11.6502	4	22	5.50604	14.098	4	22	15.3594	9.17284	4	22	2.73917	11.1241	4	22	2.81335	11.4618	4	22	0.182943	1.41337	2	22	6.58345	3.5814	3
		23	1.04356	0.445573	2	23	1.11763	9.68952	4	23	9.0418	7.2888	3	23	4.0509	11.5218	4	23	14.9556	12.2092	4	23	5.59882	14.3393	4	23	15.9032	8.46324	4	23	2.99576	10.9592	4	23	2.88741	12.5034	4	23	0.606327	1.30905	2	23	6.43609	3.98956	3
		24	0.869087	0.370279	2	24	1.18995	8.85306	4	24	8.89816	6.60253	3	24	3.87228	10.0529	4	24	14.8885	12.3509	4	24	5.65204	14.5587	4	24	15.6783	8.37528	4	24	2.99954	10.7635	4	24	2.70241	12.7034	4	24	0.710783	1.01162	2	24	6.49837	4.6407	3
		25	0.94278	0.545041	2	25	0.863762	9.26307	4	25	8.62115	6.59907	3	25	3.94498	10.0313	4	25	14.8045	13.1954	4	25	5.43527	14.8427	4	25	15.3725	9.46069	4	25	3.02179	12.1279	4	25	2.71602	10.7046	4	25	0.877531	1.13913	2	25	6.33665	4.87504	3
		26	0.949577	0.859256	2	26	0.168121	8.84383	4	26	8.53628	6.77576	3	26	3.92549	9.61462	4	26	14.7804	13.5082	4	26	5.30276	15.1266	4	26	15.2997	9.89684	4	26	3.10236	11.7475	4	26	2.71976	10.0766	4	26	0.933464	1.6296	2	26	6.11544	5.47927	3
		27	0.702812	1.61492	2	27	0.0519753	8.34779	4	27	8.55187	6.42404	3	27	4.10163	9.55576	4	27	15.2613	13.2504	4	27	5.2778	14.967	4	27	15.3019	10.0694	4	27	3.07248	11.7171	4	27	2.70226	9.64182	4	27	0.778175	1.11971	2	27	6.13665	6.02023	3
		28	0.589142	0.718401	2	28	0.0232353	9.92211	4	28	8.45177	5.54741	3	28	4.13418	8.67806	4	28	15.3121	12.9984	4	28	5.32437	14.6079	4	28	15.3617	9.95519	4	28	2.87073	13.2471	4	28	2.61694	8.98019	4	28	0.756723	1.27845	2	28	6.13808	5.86384	3
		29	0.594162	0.0288256	2	29	0.110882	9.5675	4	29	8.43385	5.66074	3	29	4.18571	8.43651	4	29	15.3492	13.0735	4	29	5.33771	14.2286	4	29	15.3005	10.2412	4	29	3.00537	12.1308	4	29	2.53542	13.236	4	29	0.82856	1.61586	2	29	6.2556	6.25381	3
		30	0.320068	0.0033531	2	30	0.246834	8.23952	4	30	8.45909	4.79639	3	30	4.13015	8.66373	4	30	15.6004	12.8841	4	30	5.48373	13.7328	4	30	15.1385	11.3776	4	30	3.40695	8.70343	4	30	2.25764	14.0417	4	30	0.931963	1.73303	2	30	6.58542	6.47248	3
		31	0.298088	0.0020813	2	31	0.36692	8.70657	4	31	8.54827	4.11552	3	31	4.01766	8.67652	4	31	15.9924	11.8605	4	31	5.49738	13.5958	4	31	15.0965	11.5401	4	31	3.5311	8.43757	4	31	2.13815	14.3519	4	31	0.858727	1.38001	2	31	6.55606	5.65704	3
		32	0.398773	0.492108	2	32	0.706402	10.7923	4	32	8.49392	4.79093	3	32	4.0369	8.25943	4	32	16.1415	11.214	4	32	5.35507	13.7002	4	32	15.1383	11.014	4	32	2.98959	7.69194	4	32	2.00192	14.1088	4	32	0.689676	1.47392	2	32	6.38647	4.93271	3
		33	0.366318	0.363747	2	33	1.18646	11.4968	4	33	8.46615	5.23797	3	33	3.84082	8.89659	4	33	16.2387	11.1234	4	33	5.56537	13.9789	4	33	15.3357	9.42038	4	33	3.00021	6.52307	4	33	1.81326	13.1491	4	33	0.666418	1.53996	2	33	6.13016	4.80514	3
		34	0.383942	0.429724	2	34	1.35732	11.7865	4	34	8.54108	6.09293	3	34	3.41065	8.91305	4	34	16.2859	11.5251	4	34	5.85147	14.3632	4	34	15.1242	10.1292	4	34	3.36874	7.29078	4	34	1.67845	13.0763	4	34	0.599821	1.53186	2	34	6.05389	4.90261	3
		35	0.273582	1.25432	2	35	1.29516	12.2528	4	35	8.60334	6.17497	3	35	3.34002	8.05975	4	35	16.2672	11.9688	4	35	6.10648	14.7475	4	35	15.0595	10.1856	4	35	3.80206	8.95124	4	35	1.62697	11.7393	4	35	0.510656	1.79345	2	35	6.20334	5.09837	3
		36	0.2855	1.39397	2	36	1.32606	13.2841	4	36	8.60947	6.09438	3	36	3.11866	8.67458	4	36	16.1044	12.4099	4	36	6.17413	14.6679	4	36	15.1884	10.1032	4	36	4.16464	10.6948	4	36	1.5157	12.0731	4	36	0.452858	1.51644	2	36	6.30016	5.27655	3
		37	0.362907	1.71067	2	37	1.43312	12.8763	4	37	8.61284	5.96101	3	37	3.0401	9.63752	4	37	15.9932	12.8313	4	37	6.25818	14.2987	4	37	15.1092	9.43148	4	37	3.74826	11.4943	4	37	1.39046	13.03	4	37	0.625256	0.976722	2	37	6.45536	4.98029	3
		38	0.266403	1.36527	2	38	1.6627	13.381	4	38	8.74548	5.38961	3	38	2.93964	9.63292	4	38	16.1002	13.6908	4	38	6.01669	13.8642	4	38	15.1781	9.54992	4	38	3.14124	11.8194	4	38	1.21634	13.9094	4	38	0.582882	0.784733	2	38	6.30287	5.00279	3
		39	0.320854	0.980517	2	39	2.00024	13.2369	4	39	8.47163	5.06401	3	39	2.85768	10.1485	4	39	15.9926	14.5532	4	39	5.60449	13.651	4	39	15.0771	10.4214	4	39	3.01605	10.922	4	39	1.14015	12.6463	4	39	0.166555	0.841783	2	39	6.479	5.18546	3
		40	0.467613	0.412332	2	40	2.2028	12.7274	4	40	8.16801	5.04585	3	40	2.8811	11.0507	4	40	15.9645	15.409	4	40	5.36227	13.8433	4	40	15.1846	9.93244	4	40	3.05896	11.5065	4	40	0.99054	11.466	4	40	0.120092	0.976296	2	40	6.54365	0.929512	3
		41	0.587379	0.489476	2	41	2.44872	13.1937	4	41	8.2652	4.1369	3	41	3.03978	11.0096	4	41	16.1375	15.9492	4	41	5.36108	14.0381	4	41	15.2419	8.30236	4	41	2.88818	11.1383	4	41	0.884979	12.1446	4	41	0.360631	0.629152	2	41	6.59185	0	1
		42	0.539238	0.711083	2	42	2.63845	13.3359	4	42	8.24395	3.62984	3	42	2.9223	11.3367	4	42	16.3158	16.3166	4	42	4.81259	14.0518	4	42	15.1061	8.9362	4	42	2.98871	10.3749	4	42	0.844055	11.2116	4	42	0.168266	0.935314	2	42	6.53296	0	1
		43	0.400337	0.890992	2	43	2.84403	12.5337	4	43	8.19952	3.11234	3	43	2.91175	10.9914	4	43	16.4328	16.2858	4	43	4.86252	13.9683	4	43	15.2133	8.43515	4	43	3.07916	9.07716	4	43	0.766632	10.1553	4	43	0.0720062	0.819067	2	43	6.52123	0	1
		44	0.007164	0.838689	2	44	3.0644	12.591	4	44	8.36961	3.02609	3	44	2.77615	11.0533	4	44	16.279	16.4915	4	44	4.86713	13.979	4	44	15.0887	7.4813	4	44	3.20483	8.69149	4	44	0.685226	10.1655	4	44	0.328444	1.13853	2	44	6.58445	0	1
		45	0.197762	0.558639	2	45	3.31241	12.5566	4	45	8.45858	3.65879	3	45	2.8075	11.3155	4	45	16.0956	18.0635	4	45	4.99966	14.2972	4	45	14.9027	8.29379	4	45	3.36911	7.59667	4	45	0.866226	9.98336	4	45	0.466017	0.35824	2	45	6.74957	0	1
		46	0.297806	0.711684	2	46	3.3227	11.9002	4	46	8.54199	3.80252	3	46	2.71102	11.2059	4	46	16.2323	18.7935	4	46	6.4346	14.4397	4	46	14.8694	8.20416	4	46	3.35425	9.21727	4	46	0.960388	10.9829	4	46	1.00562	0.398848	2	46	7.04383	0	1
		47	0.431122	0.710098	2	47	3.27654	11.6605	4	47	8.53585	3.93588	3	47	2.85534	10.4666	4	47	16.3149	19.4951	4	47	6.55182	14.1571	4	47	15.0196	7.22489	4	47	3.44739	9.20053	4	47	1.07607	10.9879	4	47	1.02732	0.57273	2	47	7.35308	0	1
		48	0.602974	0.856043	2	48	3.379	12.5694	4	48	8.51334	4.31934	3	48	2.95184	11.8671	4	48	15.8915	20.0669	4	48	6.14468	13.8683	4	48	15.0239	7.69236	4	48	3.46487	8.60813	4	48	1.18443	9.84114	4	48	1.05362	0.485674	2	48	7.51909	0	1
		49	0.859924	0.854075	2	49	3.44215	11.8121	4	49	8.83459	4.31736	3	49	2.86908	12.5579	4	49	15.7103	20.7839	4	49	6.11279	13.5722	4	49	15.001	8.63594	4	49	3.50314	7.91867	4	49	1.24892	10.7759	4	49	1.27233	0.412211	2	49	7.60696	0	1
		50	1.04787	0.276743	2	50	3.44427	8.98579	4	50	8.84945	4.37561	3	50	2.42127	12.6894	4	50	15.6906	20.444	4	50	6.22089	13.611	4	50	15.0984	8.62008	4	50	3.38657	7.89171	4	50	1.40097	12.0667	4	50	1.41276	0.322739	2	50	7.81643	0	1
		51	1.32986	0.341716	2	51	3.57273	7.83125	4	51	8.91737	4.16503	3	51	2.69887	12.5292	4	51	15.946	20.2025	4	51	6.11447	13.4846	4	51	15.0743	8.86248	4	51	3.31097	9.77666	4	51	1.3573	10.5663	4	51	1.44946	0.32689	2	51	7.49375	0	1
		52	1.54327	0.978056	2	52	3.74145	7.13141	4	52	8.84009	3.92918	3	52	2.87866	12.8299	4	52	15.834	19.7999	4	52	6.15247	13.0231	4	52	14.8671	9.07314	4	52	3.27319	9.92589	4	52	1.50189	9.62195	4	52	1.41981	0.510975	2	52	7.27272	0	1
		53	1.53239	1.05176	2	53	3.82337	7.22237	4	53	8.94341	3.9847	3	53	3.01162	13.017	4	53	15.8747	19.4232	4	53	5.66562	13.1283	4	53	14.4492	10.5076	4	53	3.41772	9.46775	4	53	1.82654	7.97004	4	53	1.51745	0.599055	2	53	7.17249	0	1
		54	1.67074	0.840465	2	54	3.98018	6.54415	4	54	9.26802	4.71984	3	54	3.1024	11.7946	4	54	16.016	19.4898	4	54	5.9407	13.3884	4	54	14.7242	10.7367	4	54	3.45087	7.94282	4	54	2.16295	9.06431	4	54	1.62425	0.4438	2	54	7.17582	0	1
		55	1.91636	0.802344	2	55	4.16112	5.0486	4	55	9.1981	5.28531	3	55	3.37023	12.0886	4	55	15.7715	18.9437	4	55	6.01987	13.7434	4	55	14.7585	10.2763	4	55	3.74933	6.56123	4	55	1.8952	9.21273	4	55	1.83564	1.10583	2	55	7.15611	0	1
		56	1.87597	0.532597	2	56	4.48929	4.75814	4	56	8.90025	5.47427	3	56	3.60926	10.4889	4	56	15.6324	18.9901	4	56	5.86575	14.1084	4	56	14.9889	10.4503	4	56	3.87073	6.55644	4	56	1.71329	10.3769	4	56	1.95639	0.150202	2	56	6.86999	0	1
		57	1.84613	0.503435	2	57	4.72664	5.19252	4	57	9.06742	5.71696	3	57	3.58624	9.47758	4	57	15.672	19.3106	4	57	5.82867	14.001	4	57	15.0103	10.0222	4	57	3.69962	8.28048	4	57	1.76814	9.89947	4	57	2.068	0.82586	2	57	6.37378	0	1
		58	1.87027	0.429949	2	58	4.85192	4.36799	4	58	9.04949	5.51873	3	58	3.75449	8.75122	4	58	15.7633	18.8113	4	58	6.38312	13.6915	4	58	15.1864	8.80808	4	58	4.2095	9.11924	4	58	1.7198	10.442	4	58	2.07106	0.608406	2	58	6.09168	0	1
		59	1.89058	0.635167	2	59	4.75789	4.12789	4	59	9.0211	5.46702	3	59	3.65141	9.81339	4	59	15.6624	18.0974	4	59	5.95688	13.48	4	59	15.3633	9.5296	4	59	4.19595	10.4714	4	59	1.93051	9.12999	4	59	1.96863	1.40326	2	59	5.87851	0	1
		60	1.84331	0.833267	2	60	4.53691	4.32967	4	60	8.89947	5.89151	3	60	3.41452	10.8003	4	60	15.7195	18.7459	4	60	6.05548	13.2041	4	60	15.5311	9.51407	4	60	4.28372	13.3709	4	60	2.29073	8.31958	4	60	1.89669	1.11904	2	60	5.62607	0	1
		61	1.80871	0.572163	2	61	4.86651	3.20662	4	61	8.93382	5.70888	3	61	3.38997	10.4484	4	61	15.7731	19.168	4	61	5.76086	12.9214	4	61	15.8426	9.41203	4	61	4.3237	8.1679	4	61	2.32445	7.55127	4	61	1.70585	0.794151	2	61	5.62197	0	1
		62	1.78166	0.452633	2	62	4.69682	3.67655	4	62	9.11746	5.47516	3	62	3.58024	10.853	4	62	15.6292	19.474	4	62	5.4472	12.5796	4	62	15.6944	10.7241	4	62	4.43997	7.46574	4	62	2.0941	7.08888	4	62	1.58349	0.179286	2	62	5.49075	0	1
		63	1.60085	0.57631	2	63	4.90029	3.73963	4	63	8.49725	5.65428	3	63	3.41568	11.1563	4	63	15.5348	20.1493	4	63	5.34921	12.8467	4	63	15.7639	11.0513	4	63	4.50903	6.81747	4	63	2.15898	7.6229	4	63	1.46185	0.151834	2	63	5.39193	0	1
		64	1.32357	0.346332	2	64	4.90746	3.65925	4	64	8.46473	5.85259	3	64	3.58305	12.2893	4	64	15.405	19.6205	4	64	5.35315	12.9859	4	64	15.8958	10.5771	4	64	4.45505	2.19985	4	64	2.12651	8.48524	4	64	1.49637	0.0060307	2	64	5.45311	0	1
		65	0.0846405	0.55049	2	65	5.01993	3.81674	4	65	8.4782	6.12319	3	65	3.79829	12.2858	4	65	15.3805	18.41	4	65	5.26114	12.7167	4	65	16.035	12.2275	4	65	3.87314	2.62831	4	65	1.99298	7.23891	4	65	1.53252	0.442828	2	65	5.25284	0	1
		66	0.0570831	1.08408	2	66	4.85782	4.89504	4	66	8.36845	6.48794	3	66	3.79417	12.0779	4	66	15.5677	17.9881	4	66	5.55603	12.6199	4	66	16.0844	12.1967	4	66	3.31277	5.22967	4	66	2.24759	7.08379	4	66	1.73343	0.357611	2	66	5.25664	0	1
		67	0.155518	1.14423	2	67	4.86591	4.22941	4	67	8.37972	6.61242	3	67	3.81512	13.2968	4	67	15.1819	17.8039	4	67	5.65106	12.7282	4	67	16.0716	11.0439	4	67	3.19604	5.34688	4	67	2.23232	8.26908	4	67	1.9398	0.240433	2	67	5.27254	0	1
		68	0.162231	1.08627	2	68	4.84085	3.61905	4	68	8.33512	6.78202	3	68	3.64297	12.8813	4	68	15.3439	19.0723	4	68	5.7872	12.831	4	68	16.0941	11.104	4	68	3.2818	6.18517	4	68	2.32663	8.2873	4	68	1.98698	0.453502	2	68	5.17486	0	1
		69	0.309059	0.872136	2	69	4.61716	2.74869	4	69	8.27661	6.59246	3	69	3.41365	12.7109	4	69	15.3116	19.5989	4	69	5.81833	12.7802	4	69	16.1113	10.3912	4	69	3.33957	8.38731	4	69	2.15105	7.13899	4	69	1.80768	0.697674	2	69	5.27098	0	1
		70	0.620071	0.694172	2	70	4.62925	2.50457	4	70	8.26479	6.47434	3	70	3.2673	13.5984	4	70	15.4432	20.6473	4	70	5.82916	12.7294	4	70	16.0791	8.82963	4	70	3.36115	5.48917	4	70	2.31146	6.80996	4	70	1.6317	0.441504	2	70	5.28451	0	1
		71	0.789185	0.869889	2	71	4.35083	2.63396	4	71	8.21341	7.24809	3	71	3.19546	12.9139	4	71	15.4344	21.6538	4	71	5.93085	12.8773	4	71	15.9911	8.42759	4	71	3.2717	3.74527	4	71	2.32544	7.37285	4	71	1.41731	0.570619	2	71	5.17604	0	1
		72	0.707184	0.981942	2	72	4.32061	2.3167	4	72	7.81067	6.04725	3	72	2.97108	11.4858	4	72	15.5814	21.177	4	72	6.20218	13.6257	4	72	16.0107	8.21707	4	72	3.28296	5.06902	4	72	2.20825	8.42005	4	72	1.23965	0.185642	2	72	5.24006	0	1
		73	0.742165	0.744147	2	73	4.06252	2.05479	4	73	7.64407	4.49325	3	73	2.82635	12.2352	4	73	15.5922	21.5107	4	73	5.94296	13.9936	4	73	16.0432	8.84805	4	73	3.20233	5.13853	4	73	2.34804	9.12001	4	73	1.32422	0.248921	2	73	5.25289	0	1
		74	0.969101	1.08555	2	74	4.03811	1.76991	4	74	7.90097	5.27303	3	74	3.12186	12.6633	4	74	15.3817	22.1577	4	74	5.9787	13.9724	4	74	16.0813	8.43563	4	74	3.11832	4.83151	4	74	2.40758	8.63478	4	74	1.34572	0.242011	2	74	5.28709	0	1
		75	0.886887	1.38403	2	75	3.96815	2.43236	4	75	8.01037	4.69781	3	75	2.98302	12.7558	4	75	15.4099	21.68	4	75	5.9021	13.8176	4	75	16.0508	8.76546	4	75	2.97311	5.20605	4	75	2.34419	7.18236	4	75	1.28038	0.254561	2	75	5.36026	0	1
		76	0.610489	1.07785	2	76	3.87171	3.051	4	76	7.87474	4.70597	3	76	2.70371	13.3569	4	76	15.5454	21.1918	4	76	5.68307	13.5846	4	76	15.9556	8.4762	4	76	2.86633	6.04743	4	76	2.22922	6.68348	4	76	1.26203	0.238185	2	76	5.42035	0	1
		77	0.478516	0.708836	2	77	3.78651	3.26069	4	77	8.08994	4.59828	3	77	2.52013	12.9246	4	77	15.5261	21.564	4	77	5.91495	13.2443	4	77	15.9357	7.19944	4	77	2.83258	7.62579	4	77	1.85806	6.44416	4	77	1.23524	0.140335	2	77	5.475	0	1
		78	0.50341	0.84613	2	78	3.64817	2.7471	4	78	7.96535	4.73299	3	78	2.51264	12.4262	4	78	15.4657	21.2933	4	78	5.75598	12.9039	4	78	15.8864	7.9992	4	78	3.07498	7.0204	4	78	1.72597	6.96559	4	78	1.04399	0.468882	2	78	5.49162	0	1
		79	0.453308	0.312656	2	79	3.64458	2.74771	4	79	8.22955	4.87479	3	79	2.56107	11.9957	4	79	15.3904	19.1429	4	79	5.98514	12.561	4	79	15.8234	8.41106	4	79	3.54306	8.2785	4	79	1.41264	8.96106	4	79	0.937166	1.3955	2	79	5.64156	0	1
		80	0.367157	0.424325	2	80	3.6291	2.22415	4	80	8.05672	4.78783	3	80	2.67737	11.9095	4	80	15.484	17.7977	4	80	6.21118	12.1971	4	80	16.282	9.1122	4	80	3.62711	8.14642	4	80	1.74278	9.06221	4	80	0.941467	1.97326	2	80	6.01	0	1
		81	0.400642	0.705217	2	81	3.69007	2.4724	4	81	7.83347	4.55202	3	81	2.79111	12.5259	4	81	15.6444	15.6238	4	81	6.1192	12.3541	4	81	16.1579	10.0244	4	81	3.44177	9.22646	4	81	1.93761	8.85948	4	81	0.946268	1.87245	2	81	6.27869	0	1
		82	0.661499	0.944398	2	82	3.55817	2.84262	4	82	7.5761	4.74219	3	82	2.67389	11.0518	4	82	15.5528	14.6811	4	82	5.94989	12.9108	4	82	16.0786	10.6719	4	82	3.55054	9.25447	4	82	2.12105	9.49479	4	82	1.01672	1.86829	2	82	6.2635	0	1
		83	0.822502	1.0688	2	83	3.55759	3.09902	4	83	7.50028	5.629	3	83	2.64855	11.8058	4	83	15.472	15.2432	4	83	5.76273	13.383	4	83	16.082	10.8607	4	83	3.37549	9.24136	4	83	2.25839	8.42401	4	83	1.04255	1.52261	2	83	6.28086	0	1
		84	0.792809	1.22859	2	84	3.32069	3.3439	4	84	7.3383	5.80963	3	84	2.70898	11.9516	4	84	15.5718	16.055	4	84	5.92706	13.5775	4	84	16.0485	11.5391	4	84	3.39481	10.0383	4	84	2.2554	7.57144	4	84	1.03866	2.69551	2	84	6.36461	0	1
		85	0.744049	0.856598	2	85	3.40024	2.01083	4	85	7.22855	5.39136	3	85	2.65533	12.7802	4	85	15.4546	16.8891	4	85	5.67734	13.401	4	85	15.9841	11.4155	4	85	3.16833	11.3142	4	85	2.2034	7.39552	4	85	0.977747	2.9254	2	85	6.3233	0	1
		86	0.795227	1.33957	2	86	3.36335	2.13114	4	86	7.17569	5.23905	3	86	2.51546	14.3909	4	86	15.225	16.7675	4	86	5.59091	13.2339	4	86	15.9644	11.5435	4	86	3.2038	12.5035	4	86	2.08237	7.52172	4	86	0.962362	2.99375	2	86	6.2729	0	1
		87	0.754524	1.35154	2	87	3.03115	2.30856	4	87	7.00234	6.27911	3	87	2.40907	14.4437	4	87	15.3111	16.972	4	87	5.57224	13.134	4	87	15.77	11.7017	4	87	3.18008	10.9352	4	87	1.96124	7.67032	4	87	0.938761	1.71361	2	87	6.39168	0	1
		88	0.775299	0.918548	2	88	2.88211	1.80969	4	88	6.98495	7.17598	3	88	2.57983	12.8054	4	88	15.3901	17.147	4	88	5.71689	12.9262	4	88	15.8216	11.88	4	88	3.47055	10.8597	4	88	2.13986	7.44597	4	88	0.995295	1.15964	2	88	6.43722	0	1
		89	0.697098	1.1714	2	89	2.97751	1.33444	4	89	6.90692	8.59505	3	89	2.74086	12.7882	4	89	15.7357	17.0648	4	89	5.53149	12.587	4	89	15.7617	12.4454	4	89	4.05972	9.42742	4	89	2.38319	6.74954	4	89	1.02389	1.03459	2	89	6.46577	0	1
		90	0.675705	0.794926	2	90	2.83599	1.4686	4	90	6.91303	8.87813	3	90	2.72276	12.0445	4	90	15.6278	16.3501	4	90	5.31152	12.2144	4	90	15.812	12.3208	4	90	4.13467	9.13512	4	90	2.19214	5.99597	4	90	1.08727	1.17241	2	90	6.45139	0	1
		91	0.736916	0.905043	2	91	2.77716	1.53615	4	91	7.02711	8.57175	3	91	2.61971	11.6088	4	91	15.6864	15.7914	4	91	5.63455	11.8345	4	91	15.678	11.4529	4	91	4.50742	8.48983	4	91	1.94878	6.69393	4	91	1.10756	1.06275	2	91	6.37782	0	1
		92	0.736435	0.887332	2	92	2.92902	2.01493	4	92	7.07889	8.47375	3	92	2.65874	9.9915	4	92	15.5329	14.1802	4	92	5.5603	12.0042	4	92	15.5074	10.4821	4	92	4.73578	8.63757	4	92	1.83856	7.14909	4	92	1.14499	1.42096	2	92	6.43509	0	1
		93	0.707504	1.57128	2	93	2.93728	1.77096	4	93	7.11661	8.53908	3	93	2.69994	9.3143	4	93	15.4262	13.3337	4	93	5.51709	12.4949	4	93	15.5371	8.92248	4	93	5.18579	7.67047	4	93	1.90038	4.88528	4	93	1.18993	1.62333	2	93	6.36869	0	1
		94	0.559837	1.34147	2	94	2.79504	2.37253	4	94	7.27126	8.36802	3	94	2.67052	9.99325	4	94	15.5488	13.5591	4	94	5.5047	12.6956	4	94	15.7459	8.28347	4	94	5.33545	8.2116	4	94	1.8959	5.49204	4	94	1.15669	1.08353	2	94	6.2238	0	1
		95	0.382294	1.52838	2	95	2.9103	2.67699	4	95	7.23457	8.23939	3	95	2.58005	9.17744	4	95	15.6725	13.3389	4	95	5.75705	12.9353	4	95	15.9039	7.53214	4	95	5.50101	11.0243	4	95	1.96933	5.85765	4	95	1.02906	1.09321	2	95	6.12944	0	1
		96	0.340698	1.80417	2	96	2.93438	3.25595	4	96	7.22475	8.66177	3	96	2.47906	9.83514	4	96	15.6006	12.9206	4	96	5.68222	12.6238	4	96	15.9919	7.36457	4	96	5.71573	14.403	4	96	1.87621	7.35303	4	96	1.04521	0.935731	2	96	5.88473	0	1
		97	0.275543	1.93747	2	97	3.00475	4.19589	4	97	7.28958	8.49341	3	97	2.53204	9.66148	4	97	15.678	13.3576	4	97	5.38449	12.4562	4	97	16.065	7.44477	4	97	5.98669	15.0988	4	97	2.06195	8.32569	4	97	1.16605	1.32719	2	97	5.7114	0	1
		98	0.164619	1.35486	2	98	2.90978	3.66193	4	98	7.34401	8.60871	3	98	2.35431	11.3763	4	98	15.6722	12.9483	4	98	5.88361	12.1876	4	98	16.0735	7.22205	4	98	6.6189	14.6057	4	98	2.05588	9.57926	4	98	1.04208	1.13473	2	98	5.71667	0	1
		99	0.00025177	1.0672	2	99	2.93469	3.25238	4	99	7.48802	9.46014	3	99	2.97684	11.1737	4	99	15.5817	13.1743	4	99	6.02133	11.8513	4	99	15.8885	6.85022	4	99	6.60507	14.9693	4	99	1.96484	9.82046	4	99	0.934288	1.42403	2	99	5.80235	0	1
		100	0.0653839	0.798138	2	100	3.05363	3.38664	4	100	7.60539	8.91751	3	100	3.05717	10.7899	4	100	15.6208	13.2484	4	100	6.02942	11.358	4	100	16.0492	6.80955	4	100	6.49588	13.3842	4	100	1.97792	9.33264	4	100	0.888672	0.887377	2	100	5.67716	0	1
		101	0.0554428	0.727022	2	101	2.7002	3.37596	4	101	7.63609	9.35258	3	101	2.9615	11.1912	4	101	15.5803	13.5937	4	101	6.38565	10.8134	4	101	15.9078	6.85919	4	101	6.48413	13.0355	4	101	1.94745	9.54421	4	101	0.825291	1.27101	2	101	5.76446	0	1
		102	0.11071	1.36574	2	102	2.76605	4.49329	4	102	8.05498	9.94438	3	102	2.97839	11.4191	4	102	15.6662	13.8702	4	102	6.27023	10.6932	4	102	15.6999	7.61031	4	102	6.42386	12.5223	4	102	1.96385	9.48134	4	102	0.746119	0.999242	2	102	5.78888	0	1
		103	0.0513306	1.31753	2	103	2.65876	5.19327	4	103	8.05646	11.5477	3	103	2.90775	12.0171	4	103	15.8059	13.2817	4	103	6.52417	10.973	4	103	15.7408	7.93357	4	103	6.45569	9.94866	4	103	1.92935	10.8648	4	103	0.519989	0.687984	2	103	5.95671	0	1
		104	0.193893	1.42554	2	104	2.83661	4.9454	4	104	7.85596	12.5804	3	104	2.70117	12.4692	4	104	15.5655	13.0247	4	104	6.63226	11.255	4	104	15.7324	8.26309	4	104	6.40012	10.2391	4	104	1.55228	10.7995	4	104	0.528093	0.810344	2	104	6.13958	0	1
		105	0.24295	1.56774	2	105	2.48291	5.78213	4	105	7.76195	11.8835	3	105	2.72111	12.2527	4	105	15.6499	13.3263	4	105	6.51709	11.4521	4	105	15.7643	9.46648	4	105	6.50504	10.2481	4	105	1.19002	10.3526	4	105	0.465685	0.323134	2	105	6.42663	0	1
		106	0.256706	1.21104	2	106	2.29538	5.75232	4	106	7.55457	10.2198	3	106	2.82951	12.3496	4	106	15.7798	13.1809	4	106	6.77313	11.4399	4	106	15.2448	9.03468	4	106	6.27097	11.7335	4	106	0.869202	9.20247	4	106	0.496435	0.279999	2	106	7.08487	0	1
		107	0.166519	0.904919	2	107	2.65301	6.72865	4	107	7.52403	8.32947	3	107	2.96448	12.382	4	107	16.1615	12.8482	4	107	7.06799	11.3023	4	107	15.306	9.0893	4	107	5.80469	12.3748	4	107	0.641617	9.51558	4	107	0.519455	0.449729	2	107	7.33552	0	1
		108	0.0728989	0.88041	2	108	2.45425	5.99136	4	108	7.49464	9.03906	3	108	2.78056	11.5014	4	108	16.7872	12.6119	4	108	6.99155	11.0027	4	108	15.3748	8.79149	4	108	5.47507	12.257	4	108	0.461746	9.64816	4	108	0.642948	0.19547	2	108	7.09021	0	1
		109	0.150902	0.831979	2	109	2.41019	5.50607	4	109	7.7561	9.5418	3	109	2.87235	11.3552	4	109	16.8239	12.4067	4	109	7.11325	11.1337	4	109	15.3435	8.52288	4	109	5.25259	11.6821	4	109	0.462036	10.0649	4	109	0.564518	0.634295	2	109	6.88283	0	1
		110	0.136406	0.743737	2	110	2.41656	4.80013	4	110	8.10289	8.53356	3	110	2.91083	11.8748	4	110	16.6331	12.3741	4	110	7.56418	11.1872	4	110	14.9653	7.849	4	110	4.93515	11.1793	4	110	0.54538	10.063	4	110	0.649763	0.704642	2	110	6.75565	0	1
		111	0.222214	0.259884	2	111	2.72604	5.01883	4	111	7.88725	8.21521	3	111	2.82574	12.0652	4	111	16.3078	12.8848	4	111	7.66821	10.8051	4	111	15.1384	6.89146	4	111	4.86667	11.4952	4	111	0.564331	9.2586	4	111	0.691946	0.384708	2	111	6.67457	0.47181	3
		112	0.359016	0.110135	2	112	2.54357	4.98003	4	112	7.95917	8.52977	3	112	2.65923	12.0465	4	112	15.865	12.655	4	112	7.50806	10.4779	4	112	15.1877	7.1752	4	112	4.79111	12.9903	4	112	0.631073	9.93308	4	112	0.580376	0.183504	2	112	6.92699	4.26884	3
		113	0.508827	0.075916	2	113	3.06429	4.3317	4	113	8.15599	9.69751	3	113	3.10316	14.5632	4	113	15.7856	12.5703	4	113	7.74936	10.6489	4	113	15.3576	7.26398	4	113	4.88	12.6482	4	113	0.569519	9.55258	4	113	0.557011	0.20553	2	113	6.95015	4.75351	3
		114	0.54158	0.42746	2	114	2.64296	4.62805	4	114	8.38384	9.07146	3	114	2.69206	17.2922	4	114	15.7041	12.4926	4	114	7.853	11.0216	4	114	15.3318	7.70966	4	114	5.26251	13.6037	4	114	0.696152	7.65026	4	114	0.30324	0.43056	2	114	6.87636	4.27141	3
		115	0.416428	0.568793	2	115	2.54292	3.76332	4	115	8.35278	8.17107	3	115	2.80832	17.4121	4	115	15.6903	12.1566	4	115	7.74216	11.1859	4	115	15.3979	8.36321	4	115	5.42276	13.1673	4	115	1.02631	7.66155	4	115	0.00326729	0.429791	2	115	6.81451	4.86482	3
		116	0.457176	0.435228	2	116	2.93233	3.84418	4	116	8.36423	7.16484	3	116	2.90239	16.5191	4	116	15.511	12.1824	4	116	8.05383	11.3226	4	116	15.6161	7.53423	4	116	5.96475	13.3098	4	116	1.16609	9.04971	4	116	0.314226	0.66028	2	116	6.66961	5.23323	3
		117	0.356827	0.367113	2	117	2.5657	3.61523	4	117	7.91836	6.74455	3	117	2.98466	16.5159	4	117	15.5179	12.3878	4	117	8.23654	11.4592	4	117	15.5078	7.7613	4	117	6.21475	13.3127	4	117	1.48143	9.78787	4	117	0.29664	0.30713	2	117	6.6548	5.28954	3
		118	0.268486	0.877745	2	118	2.6692	3.58549	4	118	7.74751	7.01626	3	118	2.91918	16.1154	4	118	15.6034	12.1933	4	118	8.31857	11.5976	4	118	15.4846	8.27646	4	118	6.04282	12.844	4	118	1.86035	10.3511	4	118	0.293835	0.261207	2	118	6.70767	5.30594	3
		119	0.323128	1.16125	2	119	2.86681	4.21666	4	119	8.01042	6.13158	3	119	3.06998	15.388	4	119	15.1727	12.1444	4	119	8.51111	11.5731	4	119	15.4421	8.27481	4	119	6.10117	12.0411	4	119	1.80779	7.29199	4	119	0.262529	0.574751	2	119	6.72964	5.81113	3
		120	0.10701	0.982497	2	120	2.58829	4.34987	4	120	7.88851	4.73184	3	120	2.8847	14.5882	4	120	15.1099	12.3794	4	120	8.37418	11.5351	4	120	15.2654	8.17609	4	120	6.32498	11.9018	4	120	2.03108	6.93018	4	120	0.290918	0.596504	2	120	6.8167	4.73029	3
		121	0.053894	1.37767	2	121	2.34253	5.21926	4	121	7.88791	5.07653	3	121	2.80077	14.6653	4	121	14.9662	12.0644	4	121	8.28033	11.5515	4	121	15.1501	8.11602	4	121	6.53503	10.7816	4	121	2.11116	8.09009	4	121	0.358757	0.923363	2	121	6.7897	3.72374	3
		122	0.205292	1.35856	2	122	2.75626	6.39591	4	122	7.97601	8.31821	3	122	2.90322	14.8813	4	122	15.1025	12.0616	4	122	8.75635	11.7307	4	122	15.6782	8.55903	4	122	6.52487	9.96445	4	122	2.02065	9.34708	4	122	1.03618	0.478509	2	122	6.8058	3.22573	3
		123	0.34639	1.14574	2	123	2.91078	6.58387	4	123	7.71743	8.25457	3	123	3.09103	14.9507	4	123	15.2013	12.8482	4	123	8.41275	11.9098	4	123	15.4778	8.10046	4	123	6.43494	9.35071	4	123	2.24236	10.1609	4	123	1.20369	0.319645	2	123	6.72483	3.30288	3
		124	0.536873	1.60508	2	124	2.88331	4.92411	4	124	7.57603	8.79333	3	124	3.05158	14.6192	4	124	14.9816	13.729	4	124	8.53702	12.0436	4	124	15.4057	7.96576	4	124	6.27802	8.94613	4	124	2.3476	10.003	4	124	1.23331	0.348191	2	124	6.68074	2.98792	3
		125	0.681213	1.91984	2	125	2.93638	3.87451	4	125	7.61398	9.6761	3	125	3.26045	14.9492	4	125	15.0599	14.3412	4	125	8.89447	11.7693	4	125	15.4653	7.23235	4	125	6.1235	10.7867	4	125	2.72057	9.07322	4	125	1.28979	0.0887339	2	125	6.80222	2.44117	3
		126	0.716057	1.93749	2	126	2.98357	3.92661	4	126	8.14352	9.19641	3	126	3.304	14.9388	4	126	15.2517	14.0025	4	126	8.80161	11.4951	4	126	15.6911	8.43533	4	126	5.92273	10.6398	4	126	2.96748	7.88034	4	126	1.23554	0.086835	2	126	6.90315	2.27937	3
		127	0.780228	0.511363	2	127	3.31038	3.62021	4	127	8.00916	7.9724	3	127	3.30885	14.7682	4	127	15.2731	14.1908	4	127	8.53659	11.2449	4	127	15.5148	10.434	4	127	5.52026	11.3084	4	127	3.10825	7.20603	4	127	1.06109	0.310288	2	127	6.98837	2.46886	3
		128	0.686256	0.679649	2	128	3.64841	3.45013	4	128	8.23022	7.48035	3	128	3.39587	14.849	4	128	15.0097	14.7921	4	128	8.86966	11.3764	4	128	16.0178	12.9211	4	128	5.05933	10.7004	4	128	3.26512	8.22298	4	128	1.07123	0.193156	2	128	7.30841	2.5197	3
		129	0.758415	0.622348	2	129	3.91026	3.39979	4	129	8.03087	8.00927	3	129	3.37695	14.1987	4	129	14.7771	15.4039	4	129	9.02173	11.5256	4	129	15.983	13.7661	4	129	4.72675	11.5216	4	129	3.39407	7.93058	4	129	1.04889	0.187307	2	129	7.42126	2.62106	3
		130	0.753922	0.528377	2	130	3.97076	3.45941	4	130	7.88503	8.83397	3	130	3.3057	13.7165	4	130	14.7734	15.9574	4	130	8.94537	11.6748	4	130	15.8971	13.7816	4	130	4.48959	11.701	4	130	3.4052	8.33149	4	130	1.0631	0.187065	2	130	7.44839	2.48693	3
		131	0.694572	0.57947	2	131	3.61891	3.51903	4	131	7.77122	8.96539	3	131	3.05037	12.5601	4	131	14.6468	16.1483	4	131	8.78113	11.9488	4	131	16.2043	13.2359	4	131	4.71014	11.3313	4	131	3.51169	8.71543	4	131	0.95759	0.454265	2	131	7.23294	2.66117	3
		132	0.764023	0.42217	2	132	3.44744	3.57865	4	132	7.79038	8.6326	3	132	3.20308	12.4636	4	132	14.6205	17.1253	4	132	8.78976	12.3542	4	132	16.2244	11.6549	4	132	4.38977	11.7984	4	132	3.53133	8.97479	4	132	0.926689	0.647972	2	132	6.96128	3.0762	3
		133	0.613548	0.249512	2	133	3.42294	3.63828	4	133	7.84925	9.14423	3	133	3.01979	12.5225	4	133	14.585	17.5551	4	133	8.97827	12.6646	4	133	16.0768	10.1492	4	133	4.36954	12.0645	4	133	3.41429	8.1656	4	133	0.899084	0.297045	2	133	7.01114	3.67292	3
		134	0.48558	0.223859	2	134	3.35713	3.6979	4	134	7.62395	7.75873	3	134	2.97858	12.2765	4	134	14.4445	17.397	4	134	8.69763	12.9335	4	134	15.9599	10.1291	4	134	4.31003	12.3305	4	134	3.28398	6.7699	4	134	0.794847	0.147874	2	134	6.86033	3.96905	3
		135	0.293571	0.0745734	2	135	2.89381	3.83754	4	135	7.69848	6.95946	3	135	3.02364	11.9674	4	135	14.7159	20.2445	4	135	8.70331	13.22	4	135	15.8115	9.85104	4	135	4.23376	12.5965	4	135	3.20856	7.23225	4	135	0.709076	0.310797	2	135	6.66708	4.33274	3
		136	0.250259	0.6596	2	136	3.04756	3.46496	4	136	7.62684	6.4129	3	136	2.94843	12.083	4	136	14.3254	21.4184	4	136	8.68408	13.4594	4	136	15.621	9.33699	4	136	3.99527	12.8325	4	136	3.24017	7.70397	4	136	0.664858	0.47334	2	136	6.76764	4.09375	3
		137	0.0992584	0.741402	2	137	3.03416	3.29661	4	137	7.55929	5.75617	3	137	3.08473	12.8585	4	137	14.2377	21.8542	4	137	8.75412	13.6989	4	137	15.5937	9.5184	4	137	3.67444	12.1342	4	137	3.40091	7.98107	4	137	0.629295	0.311069	2	137	7.07714	2.94522	3
		138	0.21563	0.751535	2	138	3.20947	4.29986	4	138	7.47085	5.25631	3	138	2.82949	13.3654	4	138	14.3546	21.7379	4	138	8.54715	13.5498	4	138	15.5901	9.68539	4	138	3.26682	11.8704	4	138	3.42896	8.83574	4	138	0.246847	0.359081	2	138	7.08036	2.3155	3
		139	0.544907	0.792614	2	139	3.00615	4.74489	4	139	7.41814	4.5086	3	139	2.95834	13.3933	4	139	14.3127	19.481	4	139	8.89316	13.3691	4	139	15.8247	10.7608	4	139	3.55814	11.6852	4	139	3.49857	8.55338	4	139	0.0840607	0.445743	2	139	7.00588	1.22059	3
		140	0.428802	0.483385	2	140	3.28128	3.07644	4	140	7.75003	3.72174	3	140	2.72145	13.6082	4	140	14.3708	18.9351	4	140	8.86557	13.2037	4	140	16.0016	10.657	4	140	3.55106	10.2524	4	140	3.65417	8.53269	4	140	0.0833015	0.241579	2	140	6.89523	1.10627	3
		141	0.157417	0.243973	2	141	3.17498	4.0411	4	141	7.76199	3.47299	3	141	2.62385	13.4704	4	141	14.2032	18.0181	4	141	8.87097	13.1074	4	141	16.1234	9.73636	4	141	3.29041	10.9971	4	141	3.91	11.62	4	141	0.176411	0.336875	2	141	7.13833	1.30413	3
		142	0.248573	0.25751	2	142	3.10756	4.68338	4	142	7.85693	3.26092	3	142	2.47283	13.4425	4	142	14.1886	18.1562	4	142	9.07556	12.9203	4	142	16.2618	9.55649	4	142	3.22995	10.9167	4	142	3.98203	11.2973	4	142	0.3915	0.323459	2	142	7.4434	1.74885	3
		143	0.292465	0.860285	2	143	3.07249	3.76464	4	143	7.75829	3.2041	3	143	2.43004	13.3295	4	143	14.0757	16.3276	4	143	9.37619	12.8346	4	143	16.2336	9.2574	4	143	3.50873	10.7527	4	143	4.04897	9.94959	4	143	0.63166	0.557146	2	143	7.73808	1.41257	3
		144	0.313721	0.37197	2	144	3.15826	5.40604	4	144	7.8255	4.29057	3	144	2.58095	12.4211	4	144	13.9572	16.4935	4	144	9.49219	12.7489	4	144	16.6497	8.97422	4	144	3.61716	11.7521	4	144	4.02292	7.18976	4	144	0.431725	0.281594	2	144	7.96875	0	1
		145	0.589294	0.315355	2	145	3.32589	4.5068	4	145	8.01334	2.18008	4	145	2.43679	12.6728	4	145	14.0936	16.3543	4	145	9.52765	12.7885	4	145	16.8005	8.5488	4	145	3.77563	12.0023	4	145	4.04568	6.90322	4	145	0.310329	0.470151	2	145	8.35886	0	1
		146	0.677048	0.31773	2	146	3.71938	5.0793	4	146	8.19091	2.63985	4	146	2.25108	12.5961	4	146	14.0451	16.6064	4	146	9.75812	12.9027	4	146	16.7688	7.18812	4	146	3.85272	13.3045	4	146	3.77129	10.1258	4	146	0.142408	0.366602	2	146	8.77492	0	1
		147	0.808189	0.834101	2	147	3.64332	6.17424	4	147	8.03624	4.49052	4	147	2.14581	12.6732	4	147	14.0081	15.8699	4	147	9.69824	10.1587	4	147	16.9267	7.42188	4	147	4.05167	13.9056	4	147	3.67104	10.5206	4	147	0.113802	0.292937	2	147	8.98372	0	1
		148	1.02461	0.391722	2	148	3.24262	5.76545	4	148	8.13618	5.34674	4	148	2.21693	12.9646	4	148	13.9223	15.7527	4	148	9.75317	9.49802	4	148	17.0207	7.12537	4	148	4.57132	13.5438	4	148	3.63356	11.7626	4	148	0.152046	0.123911	2	148	9.30006	0	1
		149	1.03557	0.0860741	2	149	2.71416	5.09432	4	149	8.12006	5.21234	4	149	2.35707	13.4116	4	149	13.8199	16.3173	4	149	9.91208	9.06316	4	149	17.0046	6.46156	4	149	4.80167	13.6041	4	149	3.56926	11.2291	4	149	0.145077	0.238913	2	149	9.52801	0	1
		150	0.781815	1.20734	2	150	2.69553	5.44007	4	150	8.1289	5.65129	4	150	2.52744	13.5356	4	150	14.2562	15.1343	4	150	10.1181	8.4638	4	150	17.0854	7.05824	4	150	4.79279	12.0734	4	150	3.41324	11.592	4	150	0.277379	0.272741	2	150	9.96992	0	1
		151	0.61483	1.13999	2	151	2.74126	6.12643	4	151	8.32513	5.02845	4	151	2.54199	14.0224	4	151	14.3136	14.1978	4	151	10.2752	8.06486	3	151	17.2148	7.5613	4	151	5.04861	11.9888	4	151	3.36034	10.3694	4	151	0.343889	0.334406	2	151	10.1388	0	1
		152	0.535675	0.678819	2	152	2.8266	5.8196	4	152	8.14034	4.82507	4	152	2.58654	14.3458	4	152	14.003	14.5959	4	152	10.4797	7.84693	3	152	17.4786	7.82328	4	152	5.02936	12.2048	4	152	3.26605	9.58615	4	152	0.195538	0.180993	2	152	10.0045	0	1
		153	0.582642	0.789844	2	153	2.7261	5.70682	4	153	7.91304	5.20729	4	153	2.75279	14.2521	4	153	13.6325	15.3499	4	153	10.5699	7.70598	3	153	17.5641	7.68834	4	153	5.22736	12.0515	4	153	3.49174	8.81716	4	153	0.182465	0.1831	2	153	10.0872	0	1
		154	0.675941	1.20755	2	154	3.13086	5.59404	4	154	7.97031	5.48489	4	154	2.72219	13.4477	4	154	13.5491	15.4239	4	154	10.5797	7.49833	3	154	17.584	7.2166	4	154	5.33408	12.2185	4	154	3.44763	7.74357	4	154	0.135754	0.166138	2	154	10.0106	0	1
		155	0.694344	0.719959	2	155	3.47904	5.48126	4	155	8.16395	5.89643	4	155	2.82133	13.0797	4	155	13.6736	15.7138	4	155	10.5577	7.06395	3	155	17.7263	6.55768	4	155	5.28513	12.089	4	155	3.38179	6.97827	4	155	0.119056	0.285614	2	155	10.145	0	1
		156	0.590187	0.660135	2	156	3.7438	5.36848	4	156	7.94572	6.42092	4	156	2.91585	13.0191	4	156	13.8432	15.8153	4	156	10.7006	6.42923	3	156	17.7013	6.71554	3	156	5.00284	11.8595	4	156	3.45827	6.54812	4	156	0.0687752	0.0722456	2	156	10.2886	0	1
		157	0.507324	0.272865	2	157	3.60897	5.2557	4	157	7.73491	6.12045	4	157	3.06036	13.0996	4	157	14.0571	16.9129	4	157	10.7716	6.22246	3	157	17.546	6.81131	3	157	4.21689	11.8729	4	157	3.27475	7.12422	4	157	0.075613	0.379751	2	157	9.8568	0	1
		158	0.257355	0.350034	2	158	3.58036	5.14292	4	158	7.67113	6.10724	4	158	2.69262	13.3475	4	158	14.1969	17.5297	4	158	10.8041	6.41326	3	158	17.6266	6.6712	3	158	4.20282	11.6685	4	158	3.21361	6.8225	4	158	0.275084	0.402037	2	158	9.85055	0	1
		159	0.0307007	1.11603	2	159	3.34105	5.03014	4	159	8.0722	6.24302	4	159	2.63248	13.1246	4	159	13.8671	17.5032	4	159	11.1756	6.7499	3	159	17.6382	6.75796	3	159	4.50558	11.6109	4	159	3.32812	5.1279	4	159	0.570448	0.736457	2	159	9.86349	0	1
		160	0.0298843	1.23692	2	160	3.32524	4.93724	4	160	7.96455	6.49839	4	160	2.68168	13.3651	4	160	14.0491	18.8571	4	160	11.4268	7.23357	3	160	17.7187	6.46966	3	160	4.94562	12.0417	4	160	3.25966	4.82553	4	160	0.709356	0.639649	2	160	9.80684	1.80035	3
		161	0.0553513	1.38537	2	161	3.18446	4.77503	4	161	8.44517	7.44333	4	161	2.8171	13.4628	4	161	14.0971	19.9338	4	161	11.6833	7.60394	3	161	17.8363	6.449	3	161	5.35193	12.831	4	161	2.92209	5.5775	4	161	0.685972	0.38015	2	161	9.62564	4.32924	3
		162	0.0388107	1.32318	2	162	3.35887	4.98039	4	162	8.09898	8.65561	4	162	2.71663	13.5593	4	162	14.0719	20.7967	4	162	11.6019	7.42729	3	162	17.7903	6.89608	3	162	5.61102	15.0724	4	162	2.48271	7.67015	4	162	0.443527	0.488512	2	162	9.32763	5.45794	3
		163	0.0366592	0.42028	2	163	3.53579	5.40832	4	163	7.99743	9.23929	4	163	2.99164	14.0941	4	163	14.2346	19.9505	4	163	11.5691	7.14886	3	163	17.8485	6.21908	3	163	5.72672	14.6454	4	163	2.47176	8.74235	4	163	0.18816	0.5687	2	163	8.85434	4.68208	3
		164	0.00209045	0.94569	2	164	3.53027	5.7545	4	164	7.5564	10.7023	4	164	3.21088	13.4159	4	164	14.0523	18.9093	4	164	12.1128	6.88437	3	164	18.1017	5.41818	3	164	5.78354	13.8973	4	164	2.47964	7.84439	4	164	0.03088	0.69083	2	164	8.33462	4.66855	3
		165	0.0170593	1.18457	2	165	3.12645	5.80537	4	165	7.54118	10.6512	4	165	3.08707	13.1088	4	165	13.8368	16.8965	4	165	12.4108	6.78523	3	165	18.4349	5.36876	3	165	5.70178	13.7056	4	165	2.53589	8.18227	4	165	0.24341	0.549126	2	165	7.77913	4.15083	3
		166	0.0307007	1.33003	2	166	3.04546	5.06893	4	166	7.48021	10.1492	4	166	3.11261	12.0034	4	166	13.9979	16.0488	4	166	12.1908	6.92997	3	166	18.411	5.63942	3	166	5.4939	13.425	4	166	2.19917	8.94116	4	166	0.195387	0.84285	2	166	7.27807	4.11295	3
		167	0.478386	1.49734	2	167	2.69928	5.92664	4	167	7.39529	10.2113	4	167	3.04839	11.5477	4	167	14.0855	16.071	4	167	12.397	7.12755	3	167	18.21	5.76298	3	167	5.14285	12.6034	4	167	2.23869	8.36297	4	167	0.133034	1.09098	2	167	6.95966	4.94754	3
		168	0.845406	1.22499	2	168	2.73924	6.52823	4	168	7.49046	10.4387	4	168	3.38406	12.0546	4	168	13.9268	15.4452	4	168	12.6545	6.69536	3	168	18.1325	5.75154	3	168	5.30368	12.7771	4	168	2.1913	8.6481	4	168	0.092041	1.21985	2	168	6.86741	3.94903	3
		169	1.06578	0.613916	2	169	2.62756	6.90084	4	169	7.42858	10.626	4	169	3.16058	12.7724	4	169	13.8462	14.696	4	169	12.8864	6.48547	3	169	18.0464	5.6926	3	169	5.38675	12.9942	4	169	2.16954	7.47753	4	169	0.231941	0.989352	2	169	6.74927	4.20372	3
		170	1.33076	0.559999	2	170	2.24677	8.10726	4	170	7.47919	11.1075	4	170	3.04358	12.3403	4	170	13.8505	14.0509	4	170	13.2113	6.44146	3	170	18.0785	5.35016	3	170	5.17407	12.8357	4	170	2.02551	7.29331	4	170	0.252079	0.633549	2	170	6.70181	3.19003	3
		171	1.36029	0.616346	2	171	1.75587	7.58266	4	171	7.23025	11.4931	4	171	3.09954	11.5817	4	171	14.0279	13.4709	4	171	13.4896	5.86966	3	171	18.0444	4.97385	3	171	5.22638	13.206	4	171	1.84505	7.95906	4	171	0.231369	0.559233	2	171	6.63593	0.959354	3
		172	1.23255	1.1417	2	172	1.82661	5.43193	4	172	6.95603	11.0032	4	172	3.24201	11.093	4	172	14.1816	13.186	4	172	13.7136	5.3047	3	172	17.925	5.28387	3	172	5.44507	13.8106	4	172	1.59534	7.23501	4	172	0.340071	0.694301	2	172	6.66803	0	1
		173	0.852333	0.702834	2	173	2.2343	7.91417	4	173	7.02545	11.027	4	173	3.41956	11.3333	4	173	14.2226	12.9498	4	173	13.7184	4.7964	3	173	17.7246	5.28268	3	173	5.81995	11.4793	4	173	1.61435	7.40576	4	173	0.293831	0.491129	2	173	6.6132	0	1
		174	0.388664	0.510901	2	174	2.19197	8.1132	4	174	7.40802	10.8655	4	174	3.59792	10.5588	4	174	14.0272	12.4988	4	174	13.7764	4.80678	3	174	17.7711	5.43852	3	174	5.82501	11.7726	4	174	1.68245	8.91063	4	174	0.285107	0.432323	2	174	6.6675	0	1
		175	0.023819	0.524621	2	175	2.66436	5.05215	4	175	7.40083	10.8759	4	175	3.48253	10.3652	4	175	14.0864	12.7899	4	175	14.0407	4.99686	3	175	17.6054	5.65426	3	175	5.87979	11.6962	4	175	1.61189	9.27275	4	175	0.255819	0.527369	2	175	6.65648	0	1
		176	0.260323	0.72876	2	176	2.77476	5.40026	4	176	7.36576	10.2456	4	176	3.38795	11.0983	4	176	13.9465	11.6614	4	176	14.2124	5.27234	3	176	17.731	5.45486	3	176	5.92834	9.74366	4	176	1.65735	8.71493	4	176	0.293577	0.892172	2	176	6.62555	0	1
		177	0.407753	1.2082	2	177	2.46667	5.0303	4	177	7.61541	10.5035	4	177	3.37689	11.3421	4	177	13.9465	11.4467	4	177	14.1211	5.71324	3	177	17.7641	5.43747	3	177	5.91385	10.4775	4	177	1.86961	8.89275	4	177	0.371698	0.472956	2	177	6.52647	0	1
		178	0.411537	0.56563	2	178	2.73523	6.61244	4	178	7.88547	11.2873	4	178	3.48354	12.7565	4	178	14.0674	11.2219	4	178	14.4807	5.92276	3	178	17.9155	5.31641	3	178	5.90643	9.85091	4	178	1.94299	8.99288	4	178	0.557364	0.768018	2	178	6.45906	0	1
		179	0.611359	0.682779	2	179	2.76411	7.10599	4	179	7.81091	11.8141	4	179	3.38359	11.8542	4	179	13.9524	11.5078	4	179	14.5496	5.65205	3	179	17.9757	4.37653	3	179	5.93137	8.60756	4	179	2.08038	9.83555	4	179	0.543108	0.647705	2	179	6.51184	1.48825	3
		180	0.864998	0.515914	2	180	2.75724	7.24592	4	180	7.66737	12.1066	4	180	3.53587	12.0145	4	180	13.9871	12.0587	4	180	14.5601	5.44216	3	180	17.9459	4.06373	3	180	5.87546	9.19535	4	180	2.27928	10.4775	4	180	0.518654	0.926188	2	180	6.63919	3.905	3
		181	1.02456	0.576517	2	181	2.92447	6.16202	4	181	7.44438	9.96841	4	181	3.35504	12.4656	4	181	14.0353	11.4876	4	181	14.8427	5.59326	3	181	17.7555	4.32088	3	181	5.85773	12.2573	4	181	2.30164	9.8003	4	181	0.484753	0.630287	2	181	6.63406	3.46032	3
		182	1.16281	0.727881	2	182	2.98339	4.56396	4	182	7.53294	8.78088	4	182	3.55506	12.4559	4	182	13.917	10.754	4	182	14.8555	5.80335	3	182	17.5517	4.23053	3	182	5.98352	13.7786	4	182	2.4382	7.89467	4	182	0.566534	0.428695	2	182	6.73778	3.03277	3
		183	1.17276	0.975003	2	183	2.91051	4.97207	4	183	7.30904	8.38775	4	183	3.71313	12.9441	4	183	13.7331	10.3758	4	183	14.7905	5.89379	3	183	17.3387	5.30407	3	183	6.1535	13.3971	4	183	2.56094	7.88695	4	183	0.4596	0.424145	2	183	6.90835	3.15738	3
		184	1.15356	0.650164	2	184	3.10853	5.18901	4	184	7.33931	8.56665	4	184	3.82785	12.9945	4	184	13.7761	10.0063	4	184	14.7218	5.69513	3	184	17.0938	7.91838	3	184	6.30261	10.6277	4	184	2.63347	7.58187	4	184	0.297281	0.0118616	2	184	7.22109	2.67325	3
		185	1.37373	0.482331	2	185	3.12861	6.30009	4	185	7.55599	9.68069	4	185	3.8195	12.4653	4	185	14.0109	10.3352	4	185	14.6736	5.28649	3	185	16.9224	7.61467	3	185	6.36502	10.8153	4	185	2.55434	7.35055	4	185	0.21867	0.218794	2	185	7.01581	3.56444	3
		186	1.43655	0.645055	2	186	2.86422	5.62311	4	186	7.69104	9.63849	4	186	3.56209	12.3946	4	186	13.9694	10.8938	4	186	14.7739	5.1422	3	186	16.7529	8.00247	3	186	6.51871	12.4625	4	186	2.52428	7.19957	4	186	0.170362	0.476794	2	186	6.9959	3.46839	3
		187	1.25361	0.718214	2	187	2.59019	4.88077	4	187	7.75159	9.16097	4	187	3.33333	12.9291	4	187	13.882	11.1088	4	187	14.88	5.14359	3	187	16.7086	9.08444	3	187	6.55508	12.4017	4	187	2.51956	7.89655	4	187	0.144331	0.0976615	2	187	6.94936	3.39524	3
		188	1.25385	0.759655	2	188	2.20374	4.75366	4	188	7.49409	9.03077	4	188	3.32015	13.7882	4	188	14.0234	10.2314	4	188	14.4745	5.1346	3	188	16.4085	8.82488	3	188	6.75702	12.6728	4	188	2.49007	9.02558	4	188	0.171926	0.525121	2	188	6.92664	4.30025	3
		189	1.41685	0.842583	2	189	1.80479	4.50328	4	189	7.96664	10.5091	4	189	3.47848	14.2477	4	189	14.0299	7.89028	4	189	14.3531	5.15107	3	189	16.2896	8.61024	3	189	6.86166	14.1383	4	189	2.47945	8.59353	4	189	0.0481834	0.671934	2	189	6.90351	5.21317	3
		190	1.37006	0.750344	2	190	1.79248	4.29727	4	190	7.75646	11.2124	4	190	3.42602	13.905	4	190	14.1588	7.45826	4	190	14.0978	5.18666	3	190	15.9713	8.75303	3	190	6.98563	14.3877	4	190	2.39392	8.9975	4	190	0.0649357	0.514569	2	190	6.99082	5.38499	3
		191	1.31383	0.419075	2	191	1.78069	3.82216	4	191	8.28152	12.1661	4	191	3.53615	15.82	4	191	14.1327	8.42547	4	191	13.8668	5.19988	3	191	15.9305	9.81773	3	191	7.24524	13.0789	4	191	2.50218	9.7461	4	191	0.10367	0.563938	2	191	6.85577	5.40161	3
		192	1.36722	0.283503	2	192	1.98465	4.08834	4	192	8.1649	12.595	4	192	3.58778	16.6037	4	192	14.2179	9.16707	4	192	13.9433	5.26231	3	192	15.9978	11.0621	3	192	7.34317	12.8278	4	192	2.70886	9.91326	4	192	0.00932121	0.256056	2	192	7.02292	5.60527	3
		193	1.42031	0.390364	2	193	1.81604	3.52821	4	193	8.13817	12.5866	4	193	3.71793	17.4012	4	193	14.1934	8.75761	4	193	14.0326	5.62274	3	193	16.2853	10.9907	3	193	7.52219	11.3232	4	193	2.81152	10.0869	4	193	0.0291519	0.726977	2	193	7.02486	4.72197	3
		194	1.47121	0.167276	2	194	1.44835	3.03815	4	194	8.23456	12.2598	4	194	3.57066	17.9577	4	194	14.0761	7.91968	4	194	14.4019	5.98091	3	194	16.5536	11.8809	3	194	7.57693	10.9012	4	194	2.74715	10.531	4	194	0.0377674	0.505761	2	194	6.89481	4.3088	3
		195	1.60748	0.2813	2	195	1.37836	3.07222	4	195	8.0542	12.6555	4	195	3.5906	17.5812	4	195	13.9071	7.6374	4	195	14.116	5.50236	3	195	16.4631	12.3206	3	195	7.67474	11.3201	4	195	2.7404	10.7789	4	195	0.0281963	0.665326	2	195	6.89324	4.28611	3
		196	1.62289	0.878873	2	196	1.3861	3.36951	4	196	7.92474	12.2211	4	196	3.65809	17.6813	4	196	13.8493	7.80899	4	196	14.3367	5.85168	3	196	16.7514	12.9987	3	196	7.67953	11.1559	4	196	2.92139	8.90696	4	196	0.00892639	0.165583	2	196	6.81363	3.35476	3
		197	1.63758	0.593781	2	197	1.5597	3.83116	4	197	7.91644	11.7574	4	197	3.77867	17.8015	4	197	13.863	11.0289	4	197	14.4393	6.31298	3	197	16.4958	13.2049	3	197	7.49567	10.3547	4	197	3.1445	9.04983	4	197	0.00535583	0.493323	2	197	6.75142	3.51913	3
		198	1.73523	0.67974	2	198	1.67877	3.52581	4	198	7.8513	10.8275	4	198	3.77959	17.5403	4	198	13.9546	12.0673	4	198	14.4992	6.73625	3	198	16.8416	12.6377	3	198	7.52805	9.82798	4	198	3.10991	9.79518	4	198	0.126528	0.512979	2	198	6.85695	3.46112	3
		199	1.76787	0.853765	2	199	1.90081	3.45286	4	199	7.91049	7.61344	4	199	3.91179	16.5745	4	199	13.8496	12.3899	4	199	14.5851	6.97026	3	199	16.9332	12.3967	3	199	7.59024	9.34509	4	199	3.06992	10.5579	4	199	0.265099	0.436411	2	199	6.92713	3.53528	3
		200	1.71419	0.377473	2	200	1.98004	3.35743	4	200	8.18848	7.45047	4	200	4.20664	15.5623	4	200	13.859	11.9463	4	200	14.7997	6.90224	3	200	16.9785	12.4251	3	200	7.72629	8.31228	4	200	3.09262	11.2254	4	200	0.284588	0.600914	2	200	7.23666	3.63003	3
		201	1.55504	0.405014	2	201	2.26065	3.07037	4	201	8.36354	6.9419	4	201	4.26402	15.769	4	201	14.0365	11.7038	4	201	14.5911	6.2307	3	201	16.8385	12.1634	3	201	8.1152	8.17034	4	201	3.17937	10.8767	4	201	0.268911	0.660512	2	201	7.4437	3.13764	3
		202	1.377	0.401412	2	202	2.38859	3.37463	4	202	8.49004	7.02368	4	202	4.18056	15.6529	4	202	13.9576	13.416	4	202	14.6139	5.57686	3	202	16.9583	11.4823	3	202	7.97147	8.97605	4	202	3.46162	10.442	4	202	0.166119	0.690763	2	202	7.6006	1.85651	3
		203	1.44081	0.218866	2	203	2.57972	2.52233	4	203	8.61054	7.06771	4	203	4.13264	16.2379	4	203	14.0223	15.1952	4	203	14.2305	5.40647	3	203	16.7845	10.8307	3	203	7.70349	9.12082	4	203	3.58557	9.42755	4	203	0.168215	0.181728	2	203	7.59864	1.16533	3
		204	0.586357	0.149816	2	204	3.2731	2.04381	4	204	8.89252	8.29515	4	204	4.13478	16.7127	4	204	14.0851	16.1034	4	204	14.3772	5.90672	3	204	16.689	10.9305	3	204	7.44275	9.21077	4	204	3.48859	8.28399	4	204	0.0621796	0.491494	2	204	7.43866	0.568621	3
		205	0.668396	0.185222	2	205	3.5031	1.76563	4	205	8.81995	8.9538	4	205	4.32875	17.2424	4	205	14.1457	15.8042	4	205	14.7079	6.63715	3	205	16.6783	10.0996	3	205	7.67529	9.55657	4	205	3.55974	8.37564	4	205	0.171034	0.356734	2	205	7.40718	1.93998	3
		206	0.690964	0.247605	2	206	3.53981	2.03313	4	206	8.91953	9.21103	4	206	4.31426	16.7921	4	206	14.4049	15.7211	4	206	14.8831	6.91119	3	206	16.821	10.0854	3	206	7.5838	10.336	4	206	3.58173	10.7403	4	206	0.528387	0.294958	2	206	7.46876	0	1
		207	0.707726	0.464206	2	207	3.95278	1.96667	4	207	8.94324	9.26216	4	207	4.51679	15.5627	4	207	14.4251	16.2843	4	207	14.9296	6.93285	3	207	16.6577	10.2854	3	207	7.72299	11.6972	4	207	3.43198	11.4297	4	207	0.491436	0.0761925	2	207	7.41329	0	1
		208	0.847687	0.509965	2	208	3.97855	1.96121	4	208	8.76614	9.38532	4	208	4.53302	15.1238	4	208	14.1785	16.3594	4	208	14.7196	6.7884	3	208	17.0806	10.2644	3	208	7.81113	12.3854	4	208	3.07246	12.9702	4	208	0.806532	0.0479877	2	208	7.30251	0	1
		209	0.896194	0.435006	2	209	4.57815	2.11464	4	209	8.75851	9.26029	4	209	4.49851	16.1929	4	209	14.2496	14.7077	4	209	14.9118	6.64395	3	209	17.2166	9.21132	3	209	8.10345	12.685	4	209	2.61171	15.4339	4	209	0.778755	0.758263	2	209	6.98215	0	1
		210	0.914154	0.661328	2	210	4.12967	3.09742	4	210	8.70474	8.76534	4	210	4.49174	17.7216	4	210	14.2771	13.2319	4	210	15.0437	6.59411	3	210	17.0087	9.08172	3	210	8.39496	13.5417	4	210	2.56931	15.9658	4	210	0.47315	0.664962	2	210	7.23753	0	1
		211	0.856339	0.406299	2	211	4.40643	3.3156	4	211	8.73412	8.38605	4	211	4.46182	17.5376	4	211	14.3648	13.1415	4	211	15.2618	6.33201	3	211	17.3427	9.21581	3	211	8.34555	12.9922	4	211	2.69507	15.7562	4	211	0.378637	0.352293	2	211	7.31384	0	1
		212	1.0413	0.533869	2	212	4.59333	3.30101	4	212	8.94592	8.05027	4	212	4.46336	17.6236	4	212	14.3952	12.7876	4	212	15.452	6.09497	3	212	17.3589	8.8748	3	212	8.38745	13.0055	4	212	2.82587	14.2395	4	212	0.399336	0.426673	2	212	7.25095	0	1
		213	1.04416	0.0263254	2	213	4.68305	2.92827	4	213	8.99876	7.7789	4	213	4.33015	17.482	4	213	14.3972	11.707	4	213	15.2928	6.02394	3	213	17.2987	8.20595	3	213	8.35397	12.3355	4	213	2.81146	12.64	4	213	0.51774	0.065015	2	213	7.16862	0	1
		214	0.874207	0.0428132	2	214	4.7685	2.94801	4	214	9.04499	8.5513	4	214	4.28522	16.7855	4	214	14.5368	10.995	4	214	15.288	5.94572	3	214	17.316	8.04481	3	214	8.38544	11.8081	4	214	2.6993	12.3766	4	214	1.83104	0.470751	2	214	6.92739	0	1
		215	0.86792	0.0108802	2	215	4.54108	4.10463	4	215	9.29468	9.84154	4	215	4.19524	15.9315	4	215	14.5581	12.0729	4	215	15.7681	6.04168	3	215	17.491	7.33081	3	215	8.46155	11.5605	4	215	2.772	11.7303	4	215	1.94172	0.313954	2	215	6.68191	0	1
		216	1.18701	0.171679	2	216	4.60199	4.07641	4	216	9.34531	9.81676	4	216	4.36142	14.5939	4	216	14.4692	12.4964	4	216	15.7445	6.30502	3	216	17.302	6.51037	3	216	8.48184	10.7272	4	216	2.86075	11.1377	4	216	1.89374	0.230015	2	216	6.48764	0	1
		217	1.17316	0.263133	2	217	4.66321	5.13307	4	217	9.22861	9.78674	4	217	4.20018	13.1865	4	217	14.6516	11.3575	4	217	15.6753	6.73024	3	217	17.4585	7.06697	3	217	8.38431	9.84233	4	217	2.81273	12.141	4	217	1.69879	0.157012	2	217	6.79701	0	1
		218	1.04843	0.145334	2	218	4.76209	5.34605	4	218	9.16819	10.2666	4	218	4.14034	11.9719	4	218	14.7796	12.069	4	218	16.0883	7.26231	3	218	17.4074	6.3491	3	218	8.35431	8.93385	4	218	2.75676	12.8278	4	218	1.4355	0.810217	2	218	6.85623	0	1
		219	1.13235	0.167559	2	219	4.79505	5.78995	4	219	9.19558	10.5777	4	219	4.24736	11.4753	4	219	14.7298	13.8086	4	219	15.8815	7.32697	3	219	17.4733	6.5125	3	219	8.25055	8.49346	4	219	2.88103	13.3259	4	219	1.3985	1.49736	2	219	6.7068	0	1
		220	1.05311	0.10189	2	220	4.30019	5.79799	4	220	9.65921	11.1132	4	220	4.20026	10.7641	4	220	14.6938	12.5509	4	220	15.9808	7.16455	3	220	17.4424	7.60569	3	220	8.21762	8.42495	4	220	3.12482	10.233	4	220	1.30007	0.913898	2	220	6.92227	0	1
		221	1.06062	0.34504	2	221	4.37236	5.84884	4	221	9.67025	10.9948	4	221	4.20849	10.2895	4	221	14.8093	12.2673	4	221	15.8997	7.92341	3	221	17.2654	10.5753	3	221	8.13098	8.2161	4	221	3.27814	9.34883	4	221	1.47253	1.11313	2	221	6.87978	0	1
		222	1.11633	0.427008	2	222	4.55661	6.04137	4	222	9.52407	10.9742	4	222	4.18547	10.2515	4	222	14.8618	11.7478	4	222	16.0016	8.33174	3	222	17.4417	11.4363	3	222	7.9097	8.51815	4	222	3.37445	9.30353	4	222	1.33588	2.01995	2	222	6.90098	0	1
		223	1.17489	0.257818	2	223	4.21087	5.32065	4	223	9.64286	10.995	4	223	4.10934	9.9372	4	223	14.97	10.3349	4	223	16.1427	9.17632	3	223	17.5324	10.0689	3	223	7.65936	8.9095	4	223	3.45866	9.62538	4	223	1.29686	1.53001	2	223	6.95333	0	1
		224	1.0553	0.737163	2	224	4.48148	5.41022	4	224	9.54114	11.5007	4	224	4.16795	10.0927	4	224	15.0622	9.06952	4	224	16.2476	9.53806	3	224	17.1976	9.99624	3	224	7.47693	8.41264	4	224	3.49031	9.86905	4	224	1.39432	0.629904	2	224	6.91113	0	1
		225	1.05972	0.375265	2	225	4.55791	5.87437	4	225	9.37335	11.853	4	225	4.19677	9.92967	4	225	15.238	8.46646	4	225	16.3445	9.13245	3	225	17.2231	9.01121	3	225	7.27954	8.37592	4	225	3.41826	10.0143	4	225	1.41203	1.88339	2	225	6.86792	0	1
		226	1.27924	0.407204	2	226	4.54774	5.93729	4	226	9.37198	12.2736	4	226	4.26637	10.9716	4	226	14.8518	8.70025	4	226	16.1555	8.7325	3	226	17.4531	9.78619	3	226	7.41949	8.53386	4	226	3.52582	10.5082	4	226	1.47349	1.99846	2	226	6.89082	0	1
		227	1.4414	0.423678	2	227	4.43305	5.94239	4	227	9.45913	12.3822	4	227	4.38512	12.2536	4	227	14.8934	9.55827	4	227	16.1927	8.6309	3	227	17.8313	9.60655	3	227	7.63974	8.98837	4	227	3.67671	10.7098	4	227	1.42934	2.32164	2	227	7.03398	0	1
		228	1.7627	0.399876	2	228	4.5001	4.80882	4	228	9.37379	12.6378	4	228	4.37572	11.9899	4	228	15.0232	9.80936	4	228	16.1985	8.50485	3	228	17.664	9.32017	3	228	7.59509	9.82285	4	228	3.7048	12.438	4	228	1.62851	1.96225	2	228	7.03893	0	1
		229	2.15253	1.05432	2	229	4.20079	4.83052	4	229	9.2915	13.1571	4	229	4.30125	11.975	4	229	15.1648	11.2996	4	229	16.2401	8.30771	3	229	17.6536	8.28492	3	229	8.0459	10.1678	4	229	3.68303	13.0797	4	229	1.6378	1.29362	2	229	6.71393	0	1
		230	2.27385	0.588887	2	230	4.24823	4.85946	4	230	9.23364	13.1642	4	230	4.30885	11.0992	4	230	15.2495	10.1807	4	230	16.0847	8.11925	3	230	17.6332	7.91843	3	230	8.56485	9.85064	4	230	3.70273	14.4522	4	230	1.39037	1.53723	2	230	6.48385	0	1
		231	1.83435	0.0028579	2	231	4.33265	5.02159	4	231	9.3283	12.5852	4	231	4.08533	11.855	4	231	14.9826	11.1571	4	231	15.9135	7.94186	3	231	17.3908	8.21099	3	231	8.87604	9.7595	4	231	3.69798	14.4522	4	231	1.11529	1.3802	2	231	6.43263	0	1
		232	1.64763	0.989504	2	232	4.36263	5.05346	4	232	9.22115	12.4771	4	232	3.8895	11.4964	4	232	14.6341	12.4816	4	232	15.8759	7.70919	3	232	17.7195	8.8976	3	232	9.09808	9.70443	4	232	3.69901	12.9042	4	232	1.02943	1.42016	2	232	6.53062	0	1
		233	1.61541	0.630963	2	233	4.28048	5.24871	4	233	9.1069	12.3601	4	233	3.84334	11.5674	4	233	14.5944	12.75	4	233	15.5146	7.70256	3	233	17.5569	8.71297	3	233	9.22647	9.79685	4	233	3.77419	12.072	4	233	0.888624	1.83938	2	233	6.64683	0	1
		234	1.72398	0.463776	2	234	4.08989	5.78935	4	234	9.20569	12.3337	4	234	3.68849	11.2403	4	234	14.7884	12.2242	4	234	15.5152	7.80735	3	234	17.2769	8.88695	3	234	9.15793	10.1257	4	234	3.68236	11.8883	4	234	0.93222	1.97338	2	234	6.63935	0	1
		235	1.57392	0.454721	2	235	4.07071	6.59361	4	235	9.18635	12.8602	4	235	3.5271	10.9827	4	235	15.0148	12.5463	4	235	15.5209	8.11423	3	235	17.4521	8.67585	3	235	9.11111	10.1396	4	235	3.78522	12.2666	4	235	1.02529	2.54323	2	235	6.59595	0	1
		236	1.56489	0.632704	2	236	4.15477	6.6641	4	236	9.23665	12.8353	4	236	3.39314	11.0852	4	236	14.8964	12.0822	4	236	15.2604	8.29189	3	236	17.453	8.98561	3	236	9.14554	9.04127	4	236	3.76663	11.0172	4	236	1.04837	2.57353	2	236	6.4421	0	1
		237	1.58392	0.579292	2	237	4.08862	7.3719	4	237	9.4054	13.0434	4	237	3.39642	11.3502	4	237	15.0397	11.3567	4	237	15.6031	8.04176	3	237	17.2747	9.10797	3	237	9.30249	8.93462	4	237	3.79428	11.4863	4	237	1.24626	2.26069	2	237	6.38322	0	1
		238	1.49908	0.334319	2	238	3.88339	6.83388	4	238	9.46686	12.9453	4	238	3.24042	11.9574	4	238	15.1409	10.1457	4	238	15.5175	7.67932	3	238	17.5416	9.26542	3	238	9.12741	9.89966	4	238	4.01768	12.0577	4	238	1.26225	2.97212	2	238	6.53946	0	1
		239	0.967758	0.655867	2	239	3.88028	6.67952	4	239	9.216	13.2653	4	239	3.27793	12.8425	4	239	15.1165	9.58241	4	239	15.2512	7.20168	3	239	17.4342	9.3214	3	239	8.57205	11.3606	4	239	4.12604	12.1207	4	239	1.40042	2.62602	2	239	6.55455	0	1
		240	1.10786	1.44999	2	240	3.55729	5.64487	4	240	9.02619	13.9939	4	240	3.12763	13.6013	4	240	14.8998	10.0895	4	240	14.9199	7.07351	3	240	17.2243	9.40066	3	240	8.38025	12.6018	4	240	3.94427	12.5219	4	240	1.38729	2.88649	2	240	6.54019	0	1
		241	1.23814	1.13651	2	241	3.82632	4.30187	4	241	9.00471	13.7491	4	241	3.0834	11.3723	4	241	14.8206	10.826	4	241	14.8799	6.91832	3	241	17.5051	8.19024	3	241	8.16199	12.9477	4	241	3.80772	12.8145	4	241	1.50237	2.50164	2	241	6.6919	0	1
		242	1.3125	0.966345	2	242	3.83169	4.3156	4	242	9.04062	13.2901	4	242	2.92665	12.296	4	242	14.9601	11.0817	4	242	14.8449	6.66018	3	242	17.5529	7.65381	3	242	8.55481	12.985	4	242	3.81248	12.7892	4	242	1.5821	1.79361	2	242	6.86762	0	1
		243	1.14465	0.909786	2	243	3.6257	4.47014	4	243	9.29929	13.4264	4	243	2.87807	13.2093	4	243	15.1913	11.0612	4	243	14.819	6.56437	3	243	17.5514	8.12525	3	243	8.26791	11.6639	4	243	4.02136	11.6277	4	243	1.60315	1.44667	2	243	6.60359	0	1
		244	1.10177	0.921806	2	244	3.61974	4.91951	4	244	9.31998	12.329	4	244	2.89504	13.2664	4	244	15.2738	11.9777	4	244	14.5099	6.28509	3	244	17.4366	7.19908	3	244	7.8324	11.7909	4	244	3.96454	11.4909	4	244	1.55131	1.47216	2	244	6.58139	0	1
		245	1.07361	0.916205	2	245	3.51822	4.32423	4	245	9.24286	13.4258	4	245	3.11171	10.9835	4	245	15.2211	12.8366	4	245	14.6739	6.26	3	245	17.2247	7.74405	3	245	7.35654	13.1025	4	245	3.79611	11.9805	4	245	1.60866	1.55757	2	245	6.57306	0	1
		246	1.05764	0.658557	2	246	3.70117	3.98766	4	246	9.411	13.2197	4	246	3.29118	9.78461	4	246	15.0944	13.8116	4	246	14.5204	6.53691	3	246	17.1754	7.95807	3	246	7.11026	12.8664	4	246	3.37883	12.0552	4	246	1.59714	1.17753	2	246	6.62294	0	1
		247	1.07005	0.394812	2	247	3.97917	4.99213	4	247	9.39239	13.1931	4	247	3.19608	11.7255	4	247	14.8605	13.8838	4	247	14.5244	6.88062	3	247	16.9247	8.30702	3	247	7.27243	10.9658	4	247	3.08951	10.3791	4	247	1.47288	1.14996	2	247	6.46117	0	1
		248	0.701775	0.793879	2	248	3.70617	5.7198	4	248	9.54993	13.2331	4	248	3.11026	11.9832	4	248	14.8007	14.972	4	248	14.5251	6.95183	3	248	17.0824	7.93984	3	248	7.24231	10.4462	4	248	2.97719	8.99652	4	248	1.55852	1.07437	2	248	6.54937	0	1
		249	0.456039	0.891428	2	249	3.42997	4.89485	4	249	9.74995	13.9575	4	249	3.13158	12.1021	4	249	14.7484	14.4859	4	249	14.5618	6.58646	3	249	17.0458	8.87412	3	249	7.08975	10.4905	4	249	3.02339	7.91051	4	249	1.57423	1.40052	2	249	6.53175	0	1
		250	0.668251	0.92554	2	250	3.3662	5.64656	4	250	9.75095	13.7277	4	250	3.28796	10.2256	4	250	14.7512	14.5244	4	250	14.5819	6.93566	3	250	17.178	8.18503	3	250	6.92554	9.35341	4	250	2.82394	8.38036	4	250	1.59321	3.1902	2	250	6.45384	0	1
		251	0.749702	0.705295	2	251	2.93523	7.84959	4	251	9.91699	13.5718	4	251	3.42709	10.1666	4	251	14.6663	14.3738	4	251	14.9326	6.86884	3	251	17.18	8.31017	3	251	6.95074	8.99656	4	251	3.00853	9.30712	4	251	1.61794	5.53903	2	251	6.25888	0	1
		252	0.669952	1.13669	2	252	2.98336	6.91747	4	252	9.88731	13.5402	4	252	3.57461	10.6348	4	252	14.3534	14.0463	4	252	14.8915	6.64134	3	252	17.2149	8.59422	3	252	6.89081	8.74876	4	252	3.08536	10.2316	4	252	1.62019	3.92695	2	252	5.72962	0	1
		253	0.616127	1.52998	2	253	3.20628	7.21635	4	253	9.95207	13.336	4	253	3.01231	11.0043	4	253	14.3369	14.444	4	253	14.946	6.55789	3	253	17.2904	8.55971	3	253	6.80011	8.94638	4	253	3.03656	10.6771	4	253	1.31996	2.78318	2	253	5.35359	0	1
		254	0.695343	1.41217	2	254	3.15939	8.60279	4	254	9.62875	13.1606	4	254	2.78436	11.3104	4	254	14.5385	14.9744	4	254	15.3106	6.35836	3	254	17.2654	9.11542	3	254	6.93774	9.75331	4	254	3.0289	10.7096	4	254	1.43143	1.97298	2	254	5.26153	0	1
		255	0.5299	0.877629	2	255	2.96431	8.80937	4	255	9.97401	12.407	4	255	2.87172	11.8175	4	255	14.4509	14.6737	4	255	15.2681	6.30244	3	255	17.1819	8.32684	3	255	7.00604	9.55321	4	255	3.0184	10.8098	4	255	1.55468	1.5586	2	255	5.22835	0	1
		256	0.401039	1.23069	2	256	3.02677	8.52374	4	256	10.0587	12.708	4	256	3.05094	10.9145	4	256	14.2845	14.0399	4	256	15.1152	6.36797	3	256	17.2166	7.54231	3	256	6.86823	9.87466	4	256	3.01024	12.0181	4	256	1.65966	2.78423	2	256	5.20534	0	1
		257	0.354546	1.16003	2	257	2.87704	7.69576	4	257	9.88939	13.1278	4	257	3.18341	10.2298	4	257	14.2312	13.6836	4	257	15.2199	6.35209	3	257	17.1077	7.9689	3	257	6.92963	10.9698	4	257	2.94322	11.9565	4	257	1.77153	3.86425	2	257	5.14509	0	1
		258	0.594749	0.91826	2	258	2.71518	8.65783	4	258	9.59073	13.5153	4	258	3.1269	9.19938	4	258	14.1904	13.7308	4	258	15.0494	6.20565	3	258	17.0779	7.92209	3	258	6.98981	15.161	4	258	2.92389	11.1498	4	258	1.90853	3.61495	2	258	5.05696	0	1
		259	0.521317	0.72892	2	259	3.08124	9.75264	4	259	9.49776	13.6755	4	259	3.25804	9.36224	4	259	14.1043	14.1134	4	259	14.8105	6.21756	3	259	16.931	7.71845	3	259	6.93576	15.0663	4	259	2.93794	10.5428	4	259	1.77542	3.0953	2	259	5.21133	0	1
		260	0.61953	0.707967	2	260	3.28909	8.99181	4	260	9.21366	13.5501	4	260	3.23342	9.49191	4	260	14.1471	13.6828	4	260	14.5101	6.6808	3	260	17.0013	7.89904	3	260	6.86783	15.0728	4	260	2.98755	10.2936	4	260	2.00369	2.38575	2	260	5.15705	0	1
		261	0.525711	1.36281	2	261	3.34097	8.82414	4	261	9.04443	13.5271	4	261	3.40347	9.95587	4	261	14.0589	13.7377	4	261	14.3921	7.02536	3	261	16.8582	7.44289	3	261	6.75208	15.8659	4	261	2.91219	9.96535	4	261	2.07632	2.31257	2	261	5.14446	0	1
		262	0.23896	2.01099	2	262	3.521	7.95027	4	262	8.87654	13.6751	4	262	3.17532	9.97085	4	262	13.9986	14.1962	4	262	14.3024	7.25627	3	262	16.6701	7.63731	3	262	6.72861	15.9409	4	262	2.8981	10.3773	4	262	2.28661	2.0094	2	262	5.11258	0	1
		263	0.318802	1.76233	2	263	3.2295	7.08061	4	263	8.77502	13.3585	4	263	3.29205	10.347	4	263	14.0384	12.7433	4	263	14.2871	7.42173	3	263	16.2083	9.95328	3	263	6.6481	14.9765	4	263	2.77391	10.0519	4	263	2.38936	1.98214	2	263	5.19209	0	1
		264	0.50161	1.7847	2	264	3.02624	8.57538	4	264	8.59492	13.3948	4	264	3.37756	10.8129	4	264	14.1964	11.3849	4	264	14.0142	7.45966	3	264	16.0496	9.4241	3	264	6.8349	15.5514	4	264	2.42937	10.3847	4	264	2.48398	1.69754	2	264	5.09316	0	1
		265	0.499786	2.71145	2	265	3.31068	9.16143	4	265	8.32148	13.2359	4	265	3.11829	12.4267	4	265	14.2082	11.7463	4	265	13.9736	7.45131	3	265	15.8366	9.48242	3	265	6.93005	16.0566	4	265	2.32967	12.6292	4	265	2.51071	1.90203	2	265	5.09465	0	1
		266	0.727501	4.36663	2	266	3.32876	9.48102	4	266	8.0488	13.1013	4	266	2.84699	12.547	4	266	14.021	11.1882	4	266	13.8192	7.7368	3	266	15.6992	9.85285	3	266	6.99811	16.1859	4	266	2.22542	9.57158	4	266	2.5619	2.40517	2	266	5.12132	0	1
		267	1.01023	4.61717	2	267	3.04	9.28172	4	267	8.23682	13.3241	4	267	2.57558	14.0502	4	267	13.916	10.933	4	267	14.0341	8.24178	3	267	15.6559	10.0319	3	267	7.13657	14.4603	4	267	2.08812	9.18066	4	267	2.56718	1.74483	2	267	5.08712	0	1
		268	1.0929	5.19768	2	268	2.37988	9.32772	4	268	8.0117	13.4007	4	268	2.33453	13.8643	4	268	13.8688	9.84446	4	268	13.9282	8.57255	3	268	15.4134	10.4447	3	268	7.27829	13.3413	4	268	1.8708	9.83766	4	268	2.62576	2.2109	2	268	4.85118	0	1
		269	0.816788	4.68017	2	269	2.41573	9.27743	4	269	7.74885	12.4262	4	269	2.37952	13.0193	4	269	13.8127	8.84445	4	269	13.7755	8.53563	3	269	15.4632	9.89948	3	269	7.57034	13.7589	4	269	1.99451	8.96509	4	269	2.67366	2.49826	2	269	5.04975	0	1
		270	0.835678	2.85171	2	270	2.30192	10.1435	4	270	7.62103	12.1481	4	270	2.32973	13.2086	4	270	14.0591	8.60916	4	270	13.6651	8.51389	3	270	15.2145	9.605	3	270	7.34705	14.3671	4	270	2.34225	9.28794	4	270	2.33778	2.01735	2	270	5.26356	0	1
		271	1.02957	2.69326	2	271	2.28209	10.1023	4	271	7.69598	11.0346	4	271	2.29175	12.81	4	271	13.9741	9.43801	4	271	13.64	8.75763	3	271	15.1667	9.78434	3	271	7.3837	12.0752	4	271	2.37234	10.2847	4	271	2.35687	2.4005	2	271	5.33799	0	1
		272	1.06409	3.28497	2	272	2.18026	9.01482	4	272	7.93668	10.9174	4	272	2.30943	12.695	4	272	13.9745	9.17408	4	272	13.761	9.23706	3	272	15.31	10.4159	3	272	7.35287	11.2232	4	272	2.29897	10.3467	4	272	2.38396	3.63135	2	272	5.56784	0	1
		273	0.987701	3.45056	2	273	2.01851	8.33982	4	273	7.86329	10.9532	4	273	2.32844	12.2502	4	273	14.1936	8.22026	4	273	13.7418	9.68486	3	273	14.6293	10.6277	3	273	7.27985	10.2681	4	273	1.98901	10.8477	4	273	2.19183	4.00425	2	273	5.87082	0	1
		274	1.1607	3.418	2	274	1.68711	8.43021	4	274	7.89127	10.7801	4	274	2.26919	13.1628	4	274	14.1414	7.73974	4	274	13.7068	10.214	3	274	15.1105	10.0063	3	274	7.33469	9.56331	4	274	1.87874	12.0671	4	274	2.24638	4.19584	2	274	5.81315	0	1
		275	1.11796	3.12935	2	275	1.94104	9.1872	4	275	8.08856	11.1673	4	275	2.29476	13.7812	4	275	14.0473	7.00036	4	275	13.7335	12.801	3	275	14.8615	10.6063	3	275	7.32831	9.88063	4	275	1.84885	12.6779	4	275	2.44089	4.49889	2	275	5.82942	0	1
		276	1.17429	3.10116	2	276	2.08845	9.25532	4	276	8.07756	11.105	4	276	2.54104	12.6779	4	276	14.2927	7.79007	4	276	13.8456	13.2145	3	276	14.7845	11.1367	3	276	7.30109	10.3557	4	276	1.59938	14.1698	4	276	2.51826	4.00012	2	276	5.81881	0	1
		277	1.30776	2.41391	2	277	2.19945	10.481	4	277	7.95533	11.6525	4	277	2.57804	13.0769	4	277	14.424	9.74679	4	277	13.9179	13.1713	3	277	15.0303	11.7501	3	277	7.17816	10.3981	4	277	1.59929	14.7577	4	277	2.34628	3.63153	2	277	5.68813	0	1
		278	1.51453	2.52736	2	278	2.18607	8.94752	4	278	8.019	11.8996	4	278	2.7167	11.0634	4	278	14.3795	10.7831	4	278	13.8688	13.1963	3	278	14.8505	11.9931	3	278	7.37137	9.45488	4	278	1.59488	15.1971	4	278	2.20125	3.65188	2	278	5.96319	0	1
		279	1.5745	2.53565	2	279	2.38471	7.77447	4	279	8.37852	11.9908	4	279	3.02715	11.5771	4	279	14.4044	11.861	4	279	13.902	13.3292	3	279	15.2668	12.4862	3	279	7.46667	9.21939	4	279	1.59384	14.9244	4	279	2.05374	3.67687	2	279	6.06948	0	1
		280	1.54108	2.74288	2	280	2.45662	8.67852	4	280	8.53197	11.5662	4	280	2.77644	12.7751	4	280	14.6127	12.9317	4	280	13.929	13.375	3	280	14.8665	12.1265	4	280	7.55035	8.21419	4	280	1.68164	14.8155	4	280	1.9286	3.63838	2	280	6.06147	0	1
		281	1.34751	3.28041	2	281	2.58102	7.23068	4	281	8.52567	11.4242	4	281	2.39014	13.6713	4	281	14.9708	13.92	4	281	14.1991	13.2957	3	281	15.4604	11.6953	4	281	7.70993	8.49687	4	281	1.8918	14.1563	4	281	1.59617	5.4346	2	281	6.06375	0	1
		282	1.16993	2.83677	2	282	2.6462	5.21678	4	282	8.58567	10.9821	4	282	2.48836	12.3362	4	282	14.9895	14.9709	4	282	14.2584	13.0981	3	282	15.4971	11.754	4	282	8.02676	8.86907	4	282	1.44556	13.704	4	282	1.36602	6.55561	2	282	6.12286	0	1
		283	0.806343	2.30196	2	283	2.63025	4.95303	4	283	8.93742	11.138	4	283	2.61137	12.7565	4	283	14.9562	15.9154	4	283	14.38	13.0456	3	283	15.3922	13.2598	4	283	8.02298	9.04887	4	283	1.16071	13.0437	4	283	1.26277	6.39056	2	283	6.13267	0	1
		284	0.781097	1.97194	2	284	2.49001	5.15245	4	284	9.05922	10.1972	4	284	2.64864	12.2029	4	284	15.0518	15.6949	4	284	14.3287	12.1901	3	284	15.6148	13.2073	4	284	8.06888	10.9861	4	284	1.2216	12.481	4	284	1.15723	4.64562	2	284	6.14455	0	1
		285	0.738823	1.86595	2	285	2.50278	5.5738	4	285	8.88311	9.60671	4	285	2.62332	13.3652	4	285	15.0023	14.4454	4	285	14.4404	11.7336	4	285	15.6516	12.742	4	285	8.17984	9.66554	4	285	1.29669	9.94076	4	285	1.14635	4.41192	2	285	6.01605	0	1
		286	0.659027	1.79487	2	286	2.71195	4.85879	4	286	8.79155	8.43852	4	286	2.67799	13.8945	4	286	15.1288	14.1399	4	286	14.3867	11.3463	4	286	15.5097	12.7543	4	286	8.28043	9.72594	4	286	1.17107	9.73229	4	286	1.26395	5.08687	2	286	5.82726	0	1
		287	0.617378	0.915257	2	287	2.73951	4.87604	4	287	8.92295	8.23754	4	287	2.59648	14.0981	4	287	15.3324	14.0106	4	287	14.5211	11.0565	4	287	15.8516	13.367	4	287	8.25726	9.76563	4	287	0.954407	10.3132	4	287	1.20149	4.29425	2	287	5.74599	0	1
		288	0.372711	1.28218	2	288	2.63092	4.66288	4	288	9.41766	7.94965	4	288	2.46781	13.5852	4	288	15.5572	15.0089	4	288	14.583	10.8203	4	288	15.8091	12.4592	4	288	8.34955	9.43343	4	288	0.922256	10.0267	4	288	1.22789	5.51916	2	288	5.84575	0	1
		289	0.248291	0.531124	2	289	2.61662	4.96476	4	289	9.72945	7.78727	4	289	2.10506	14.1166	4	289	15.5101	15.275	4	289	14.677	10.9697	4	289	15.6937	12.1555	4	289	8.43997	8.69898	4	289	0.803131	9.91389	4	289	1.20054	3.94496	2	289	5.81325	0	1
		290	0.0255127	3.43607	2	290	2.7774	5.63348	4	290	9.73618	8.00033	4	290	2.2761	14.6228	4	290	15.5078	15.221	4	290	14.7611	11.1191	4	290	15.5881	11.5277	4	290	8.42126	9.20723	4	290	1.01859	9.8872	4	290	1.19519	3.89808	2	290	5.83879	0	1
		291	0.10907	3.82301	2	291	2.76362	5.01267	4	291	9.67043	9.00792	4	291	2.42442	14.0632	4	291	15.8156	15.0155	4	291	14.5892	11.5438	4	291	15.723	11.8094	4	291	8.47394	9.30245	4	291	1.16182	9.72371	4	291	0.950399	3.78087	2	291	5.86174	0	1
		292	0.246994	3.91406	2	292	2.54285	5.6686	4	292	9.55022	10.333	4	292	2.34186	14.4066	4	292	15.8784	14.7679	4	292	14.9996	12.0551	4	292	15.8457	11.9072	4	292	8.53467	8.85301	4	292	1.71942	9.25228	4	292	0.941511	4.34308	2	292	5.88838	2.76592	3
		293	0.479546	4.09723	2	293	2.76873	6.6495	4	293	9.82399	11.837	4	293	2.43497	13.7255	4	293	15.749	14.6653	4	293	14.9195	12.2577	4	293	15.6342	11.9875	4	293	8.54822	8.1662	4	293	2.08882	10.143	4	293	1.05258	3.61458	2	293	5.89153	4.03414	3
		294	0.63726	4.26518	2	294	2.73768	7.15591	4	294	9.96796	12.3232	4	294	2.33004	13.6339	4	294	15.9098	14.5514	4	294	14.8132	12.2827	4	294	15.7576	11.6539	4	294	8.61023	8.61647	4	294	2.15514	10.869	4	294	0.950792	3.00927	2	294	5.85143	3.86678	3
		295	0.661484	4.25668	2	295	2.73843	5.91954	4	295	10.0316	12.9466	4	295	2.04891	13.2888	4	295	15.8865	13.9354	4	295	14.9056	12.4179	4	295	15.9313	11.5444	4	295	8.6796	7.96149	4	295	2.32375	11.298	4	295	0.815287	3.21904	2	295	5.78978	4.32919	3
		296	0.66893	3.69039	2	296	2.55928	5.5191	4	296	9.9479	13.0301	4	296	1.98689	12.2093	4	296	15.9655	11.7502	4	296	15.0999	12.6765	4	296	15.5106	11.4046	4	296	8.73166	8.28191	4	296	2.18285	10.8837	4	296	0.835972	2.55448	2	296	5.9132	4.09736	3
		297	0.790047	3.24068	2	297	2.51444	5.66849	4	297	10.2282	13.3243	4	297	2.02059	12.7224	4	297	15.9468	11.0837	4	297	15.0674	12.7412	4	297	15.8401	10.8006	4	297	8.82022	7.68608	4	297	2.25394	10.02	4	297	0.904303	2.25224	2	297	5.94271	4.56032	3
		298	0.721413	3.10493	2	298	2.452	7.33067	4	298	9.92337	12.8463	4	298	2.14099	12.0687	4	298	15.8884	11.2844	4	298	15.3481	12.6734	4	298	15.9989	10.4661	4	298	8.90796	6.7641	4	298	2.15433	9.41927	4	298	0.817059	2.07766	2	298	5.59583	4.75629	3
		299	0.210464	3.21858	2	299	2.59151	6.45661	4	299	9.66341	12.0739	4	299	1.98866	11.9586	4	299	15.8337	11.6259	4	299	15.3169	12.7025	4	299	16.1118	10.5838	4	299	8.98996	7.17781	4	299	2.05714	9.1791	4	299	0.723787	2.05709	2	299	5.21516	5.51261	3
		300	0.259933	3.26915	2	300	2.53194	7.45538	4	300	9.98845	11.7584	4	300	1.9389	11.9614	4	300	15.9049	11.8993	4	300	15.5071	12.7206	4	300	15.685	11.3004	4	300	9.15533	8.22488	4	300	1.9948	9.51091	4	300	0.632242	1.74337	2	300	4.64417	5.79013	3
		301	0.216187	3.45249	2	301	2.47136	6.46284	4	301	9.93477	11.0772	4	301	1.96869	12.263	4	301	15.9005	11.3684	4	301	15.0873	12.8058	4	301	15.9541	11.7258	4	301	9.33826	9.12082	4	301	2.00688	11.1315	4	301	0.576859	2.67806	2	301	4.38124	5.48303	3
		302	0.0403137	3.30438	2	302	2.4794	6.3958	4	302	10.0288	11.1807	4	302	1.89378	11.6741	4	302	16.0494	10.2463	4	302	14.9888	12.7728	4	302	16.4091	11.6636	4	302	9.52347	10.9615	4	302	2.06009	12.9002	4	302	0.577366	2.65983	2	302	4.1398	8.21427	3
		303	0.0462646	2.25795	2	303	2.5246	9.2382	4	303	9.88475	11.3044	4	303	2.08268	11.0785	4	303	16.0504	10.5611	4	303	14.9846	12.5946	4	303	15.9542	11.9683	4	303	9.66376	13.5134	4	303	2.11244	14.0342	4	303	0.646879	2.07278	2	303	3.90331	7.07397	3
		304	0.133995	2.53078	2	304	2.40088	11.1118	4	304	9.84377	10.3084	4	304	2.09988	11.9263	4	304	16.1016	10.7078	4	304	15.5238	12.2427	4	304	16.0175	11.8997	4	304	9.7381	14.7361	4	304	2.12482	14.1515	4	304	0.735298	2.17267	2	304	3.93707	7.24572	3
		305	0.215599	2.71425	2	305	2.26137	9.99627	4	305	10.1661	10.3054	4	305	2.13757	12.0786	4	305	16.05	10.3467	4	305	15.4095	11.8525	4	305	16.0603	11.2822	4	305	9.70889	14.7421	4	305	2.22404	14.2366	4	305	0.761187	1.96777	2	305	3.99679	6.16002	3
		306	0.03862	2.41961	2	306	2.2616	8.74518	4	306	10.1596	10.4987	4	306	2.10585	14.1142	4	306	15.846	10.5197	4	306	15.4934	11.476	4	306	16.0831	12.3689	4	306	9.80191	12.0495	4	306	2.49536	14.2393	4	306	0.799427	1.5928	2	306	4.0785	5.58932	3
		307	0.0162735	3.30885	2	307	2.21494	8.48387	4	307	10.3771	9.61734	4	307	2.08376	14.5476	4	307	16.0271	11.2358	4	307	15.7157	11.0705	4	307	15.8973	12.1887	4	307	10.1814	11.8627	4	307	2.36641	14.1093	4	307	0.608288	1.72571	2	307	4.12739	7.06687	3
		308	0.0412445	3.84074	2	308	2.12425	10.6356	4	308	10.3755	9.54065	4	308	1.99867	12.8358	4	308	15.8036	10.544	4	308	15.7294	10.7423	4	308	15.9618	12.0462	4	308	10.0536	11.6904	4	308	2.20644	14.2829	4	308	0.453314	1.68287	2	308	4.13882	8.88073	3
		309	0.0168533	3.94352	2	309	1.91562	10.8098	4	309	10.2358	8.92168	4	309	2.06419	12.923	4	309	15.8287	10.4085	4	309	16.0633	10.5139	4	309	15.793	10.9808	4	309	10.266	11.7834	4	309	1.7137	14.6119	4	309	0.605055	1.87094	2	309	4.36928	8.17849	3
		310	0.134407	4.16759	2	310	2.08083	10.8303	4	310	10.4049	8.9562	4	310	2.11608	13.1056	4	310	15.9495	11.2458	4	310	15.9481	10.6213	4	310	16.1001	10.7281	4	310	10.4001	11.6013	4	310	2.46455	12.6897	4	310	0.530991	1.65225	2	310	4.50043	7.80199	3
		311	0.124641	4.39713	2	311	2.03999	11.0054	4	311	10.5076	9.4395	4	311	2.04263	13.4039	4	311	16.1244	10.9902	4	311	16.2219	10.8548	4	311	15.8963	10.7843	4	311	11.053	12.9849	4	311	2.7552	12.5304	4	311	0.523296	1.94897	2	311	4.58968	6.93159	3
		312	0.359055	4.65666	2	312	1.8494	8.87099	4	312	10.6573	9.66146	4	312	2.00862	13.828	4	312	15.9635	10.1637	4	312	16.3142	10.9011	4	312	15.6839	11.3268	4	312	11.5042	12.7567	4	312	3.04376	12.2227	4	312	0.495537	1.66254	2	312	4.88734	6.61162	3
		313	0.344795	4.11355	2	313	1.80313	8.11051	4	313	10.6211	9.48224	4	313	2.19528	13.2208	4	313	15.9701	12.6158	4	313	16.4477	10.8906	4	313	15.8808	11.7901	4	313	11.7348	11.9718	4	313	2.93256	12.8071	4	313	0.299873	1.30477	2	313	5.20217	6.97196	3
		314	0.306908	4.24904	2	314	1.6904	9.61439	4	314	10.7005	8.99964	4	314	2.20351	12.7257	4	314	15.9977	13.4293	4	314	16.4449	10.6899	4	314	15.895	11.2402	4	314	11.9543	12.1048	4	314	2.72871	11.028	4	314	0.233463	1.90366	2	314	5.41984	7.00992	3
		315	0.538643	4.28324	2	315	1.25591	8.56607	4	315	10.7894	8.9917	4	315	2.14898	11.7933	4	315	15.9511	12.1008	4	315	16.1348	10.4799	4	315	15.9745	13.15	4	315	12.1218	12.2165	4	315	2.70615	10.0248	4	315	0.300753	1.82252	2	315	5.78366	7.76283	3
		316	0.558449	3.84285	2	316	1.03313	7.87536	4	316	10.1276	8.84665	4	316	2.12495	11.6802	4	316	16.0519	11.3306	4	316	16.1895	10.3255	4	316	15.9068	12.8249	4	316	12.3696	13.3008	4	316	2.6537	9.98914	4	316	0.357103	1.57357	2	316	5.97745	7.75911	3
		317	0.353165	4.03489	2	317	1.02267	8.8947	4	317	10.0135	9.16185	4	317	2.04878	12.3833	4	317	15.947	11.9512	4	317	16.0757	10.115	4	317	15.932	11.9167	4	317	12.7576	14.6592	4	317	2.51244	9.63795	4	317	0.479456	1.42107	2	317	6.13808	6.82434	3
		318	0.451797	3.88109	2	318	0.976357	8.94428	4	318	10.2279	8.86906	4	318	2.01704	12.2018	4	318	15.9097	11.8519	4	318	16.029	9.63488	4	318	16.2701	11.6368	4	318	12.9595	15.5964	4	318	2.42023	9.02527	4	318	0.450054	1.55659	2	318	6.39667	6.17065	3
		319	0.661453	3.81702	2	319	0.782528	7.40196	4	319	10.7682	8.58427	4	319	1.73479	12.5039	4	319	15.8562	11.9986	4	319	16.0161	9.62586	4	319	16.428	11.5706	4	319	13.002	16.5221	4	319	2.41615	8.39155	4	319	0.422361	1.86803	2	319	6.41117	5.89544	3
		320	0.678185	3.84935	2	320	1.077	7.32678	4	320	10.6484	8.59036	4	320	1.8563	11.4213	4	320	15.8648	11.1986	4	320	16.1821	9.60456	4	320	16.4501	11.475	4	320	13.0481	16.5542	4	320	2.47035	8.09132	4	320	0.362034	2.15991	2	320	6.6088	5.25702	3
		321	0.561066	3.98737	2	321	1.47736	7.41904	4	321	10.6961	8.60096	4	321	1.8231	9.87976	4	321	15.8884	11.3983	4	321	16.3918	9.31861	4	321	16.2639	10.8037	4	321	12.8824	16.2051	4	321	2.71576	7.99866	4	321	0.387562	2.1771	2	321	6.82364	5.89042	3
		322	0.480637	3.58237	2	322	1.85997	7.80835	4	322	10.7583	9.02162	4	322	1.79521	9.84228	4	322	15.8198	11.2639	4	322	16.4273	9.03575	4	322	16.4926	11.5802	4	322	12.7475	15.9898	4	322	2.88663	8.31579	4	322	0.550316	1.79601	2	322	7.058	6.62499	3
		323	0.492447	3.86122	2	323	2.19481	8.09751	4	323	11.0395	8.7359	4	323	1.87161	9.71472	4	323	15.7881	11.0076	4	323	16.224	8.8168	4	323	16.2802	11.6525	4	323	12.9623	15.4373	4	323	2.76411	8.32381	4	323	0.620464	1.9228	2	323	7.27178	7.06693	3
		324	0.329315	3.9861	2	324	2.1058	8.32255	4	324	11.0434	8.55741	4	324	1.85389	10.5222	4	324	15.7114	13.1536	4	324	16.4822	8.64562	4	324	16.3851	12.0913	4	324	13.2102	13.5227	4	324	2.72513	7.44978	4	324	0.718952	1.72901	2	324	7.39557	6.98225	3
		325	0.398743	3.22562	2	325	2.07627	7.65579	4	325	11.0463	8.07503	4	325	2.15796	11.1692	4	325	15.6799	13.258	4	325	16.3676	8.49633	4	325	16.4445	12.3345	4	325	13.6362	13.1666	4	325	2.47987	7.50531	4	325	0.888666	2.23203	2	325	7.47325	6.21098	3
		326	0.499443	3.26977	2	326	2.24917	7.94493	4	326	10.9728	8.66017	4	326	2.20034	11.0068	4	326	15.5233	13.2904	4	326	16.7102	8.40188	4	326	16.5569	11.3657	4	326	13.8883	13.0612	4	326	2.3443	8.19769	4	326	0.975697	1.91142	2	326	7.4038	5.98598	3
		327	0.552803	3.11594	2	327	2.49015	8.57693	4	327	10.9903	9.14489	4	327	2.13821	11.5793	4	327	15.5329	13.3827	4	327	16.8524	8.34149	3	327	16.2871	10.7135	4	327	14.2711	12.9718	4	327	2.46738	7.21346	4	327	0.905619	2.01441	2	327	7.49214	6.41361	3
		328	0.695129	2.61773	2	328	2.40065	8.99295	4	328	10.7131	9.38281	4	328	2.15813	12.2224	4	328	15.4745	12.7874	4	328	16.9708	8.71985	3	328	16.4102	9.16343	4	328	14.5091	13.2088	4	328	2.33932	7.81608	4	328	0.777399	2.15311	2	328	7.74573	6.89486	3
		329	0.84874	2.5682	2	329	2.38129	8.83473	4	329	10.7658	9.62898	4	329	2.17784	11.5631	4	329	15.4114	12.5165	4	329	16.7951	8.8054	3					329	14.6815	12.8577	4	329	2.13878	9.88001	4	329	0.794947	2.52342	2	329	7.71242	6.70034	3
		330	0.818466	2.21019	2	330	2.43861	8.91379	4	330	10.6805	9.78595	4	330	2.30209	11.8477	4	330	15.3997	13.2502	4	330	16.8754	8.7544	3					330	14.7548	12.4737	4	330	1.94627	11.2432	4	330	0.909815	3.44971	2	330	7.81244	6.32719	3
		331	0.762077	2.35639	2	331	2.52588	8.03752	4	331	10.9577	10.787	4	331	2.59147	12.0813	4	331	15.2339	13.9323	4	331	16.9965	8.68517	3					331	14.7896	12.0115	4	331	2.15622	11.833	4	331	1.00413	3.9043	2	331	7.65556	5.87	3
		332	0.653381	2.86687	2	332	2.57374	7.04817	4	332	10.8853	11.1298	4	332	2.88555	10.8583	4	332	15.084	13.7071	4	332	16.9767	8.88043	3					332	14.8521	11.7643	4	332	2.00421	11.3634	4	332	1.06485	3.4941	2	332	7.62305	5.35534	3
		333	0.514778	3.63465	2	333	2.24742	8.48195	4	333	10.7093	11.0019	4	333	2.99822	10.6607	4	333	14.8848	13.2149	4	333	16.9764	9.08047	3					333	14.7296	12.3534	4	333	1.87904	11.4597	4	333	1.29151	3.23837	2	333	7.57083	5.12239	3
		334	0.681122	4.02764	2	334	2.07589	8.42709	4	334	10.946	9.09579	4	334	2.7445	9.00918	4	334	14.7479	13.3124	4	334	16.87	9.04438	3					334	14.8347	10.9234	4	334	1.90512	11.9787	4	334	1.39351	3.00787	2	334	7.53127	4.39899	3
		335	0.491295	4.81693	2	335	2.1819	8.02566	4	335	11.9364	8.64787	4	335	3.13893	8.15325	4	335	14.6182	13.3366	4	335	17.0456	8.84332	3					335	14.8336	11.5698	4	335	1.99968	11.918	4	335	1.54861	1.86657	2	335	7.73818	0	1
		336	0.428398	5.46385	2	336	1.89495	9.08689	4	336	12.0722	9.11384	4	336	3.59095	7.84006	4	336	14.4962	12.7749	4	336	16.9608	8.72809	3					336	14.9192	11.1339	4	336	1.98976	11.5216	4	336	1.57957	1.42754	2	336	8.16498	0	1
		337	0.45491	6.83456	2	337	1.6157	7.59532	4	337	12.183	9.54446	4	337	3.73677	6.5151	4	337	14.321	12.5883	4	337	16.8643	8.48851	3					337	14.8939	10.7903	4	337	2.15054	10.7019	4	337	1.5604	1.5081	2	337	8.29006	0	1
		338	0.549698	6.67927	2	338	1.70994	5.64745	4	338	12.1783	9.58812	4	338	4.09721	6.97314	4	338	14.2668	12.7114	4	338	16.9294	8.38669	3					338	14.9252	11.3588	4	338	2.29922	10.8376	4	338	1.57526	1.54767	2	338	8.30276	0	1
		339	0.567604	7.13966	2	339	1.90606	4.78484	4	339	12.4911	9.22147	4	339	4.2113	6.01603	4	339	14.2001	13.0078	4	339	16.7348	8.62727	3					339	14.9668	10.6737	4	339	2.82671	9.95305	4	339	1.6339	2.8159	2	339	8.10231	0	1
		340	0.679413	6.22505	2	340	1.79125	4.05404	4	340	12.475	10.1117	4	340	4.01064	5.74152	4	340	14.1662	12.5921	4	340	16.6104	8.76227	3					340	15.1635	11.2712	4	340	2.84834	9.39178	4	340	1.77703	2.16303	2	340	8.19022	0	1
		341	0.521576	4.76034	2	341	1.77617	3.24083	4	341	12.5471	10.9347	4	341	3.99177	6.33531	4	341	14.1291	12.5466	4	341	16.4725	8.89223	3					341	15.2597	11.4376	4	341	2.7748	8.77355	4	341	1.87258	1.72289	2	341	7.94155	0	1
		342	0.543427	6.11681	2	342	2.08327	6.5053	4	342	12.4174	10.8159	4					342	14.1808	11.7147	4	342	16.3962	8.80674	3					342	15.4386	11.1431	4	342	2.56111	8.51501	4	342	2.04046	1.75147	2	342	7.7455	0	1
		343	0.402542	6.77133	2	343	2.16158	7.19888	4	343	12.5814	10.0578	4					343	14.0393	12.014	4	343	16.3595	8.73062	3					343	15.6034	11.9254	4	343	2.24171	9.05753	4	343	2.23846	2.07531	2	343	7.72613	0	1
		344	0.463356	5.78059	2	344	1.93424	8.44172	4	344	13.2221	9.56391	4					344	14.0229	11.7476	4	344	16.2014	8.74882	3					344	15.9672	12.1805	4	344	2.01569	9.30959	4	344	2.34442	2.34895	2	344	7.70008	0	1
		345	0.522202	4.95624	2	345	1.80881	8.82409	4	345	13.1957	10.0937	4					345	13.993	12.6156	4	345	16.0051	8.98163	3					345	16.076	11.8639	4	345	1.77026	9.73005	4	345	2.32036	2.39481	2	345	7.63529	0	1
		346	0.60836	5.03412	2	346	1.97285	9.20607	4	346	12.8847	10.6355	4					346	13.8873	12.7789	4	346	16.0315	9.36607	3					346	16.3361	11.836	4	346	1.59979	10.2092	4	346	0.855613	0.539409	2	346	7.59703	0	1
		347	0.430801	7.6711	2	347	1.87164	7.40589	4	347	12.7588	11.2554	4					347	13.8097	13.6877	4	347	15.7501	9.61623	3					347	16.5805	12.1749	4	347	1.60004	11.1563	4	347	0.670952	0.278901	2	347	7.50683	0	1
		348	0.39489	9.30416	2	348	1.60019	8.82881	4	348	12.5267	11.8773	4					348	13.7542	14.45	4	348	15.4911	9.49507	3					348	16.8432	12.1322	4	348	1.78545	11.6293	4	348	0.640646	0.21092	2	348	7.49015	0	1
		349	0.561165	9.8027	2	349	1.96691	9.34888	4	349	12.5146	13.7145	4					349	13.7308	13.8502	4	349	15.3091	9.3739	3					349	17.1914	12.6864	4	349	2.00233	10.6713	4	349	0.241131	0.104522	2	349	7.52239	0	1
		350	0.63649	9.83869	2	350	2.36769	9.60076	4	350	12.8669	14.9104	4					350	13.6539	13.5559	4	350	15.1505	9.39683	3					350	18.3743	12.0064	4	350	2.1292	9.0843	4	350	0.0225697	0.460576	2	350	7.47209	0	1
		351	0.77317	7.66778	2	351	2.77399	10.0795	4	351	12.7968	14.9767	4					351	13.5017	12.4344	4	351	14.8737	9.41	3					351	18.7913	11.7194	4	351	2.33607	9.47031	4	351	0.333513	0.329066	2	351	7.66026	0	1
		352	0.96241	5.4237	2	352	2.80925	10.0972	4	352	12.8383	15.5745	4					352	13.4246	12.3223	4	352	14.5395	9.16705	3					352	18.2977	11.3915	4	352	2.60518	9.18932	4	352	0.780647	0.544596	2	352	7.9138	0	1
		353	0.809433	6.01088	2	353	2.87794	8.68857	4	353	13.0694	15.3866	4					353	13.456	12.1488	4	353	14.4506	9.04536	3					353	17.627	12.2059	4	353	2.70808	9.09452	4	353	1.16048	0.478253	2	353	7.96986	0	1
		354	0.602585	7.26116	2	354	2.93795	7.88695	4	354	13.0546	16.193	4					354	13.4556	11.9051	4	354	14.4637	9.08725	3					354	17.4405	13.5714	4	354	2.91461	9.54187	4	354	1.16201	0.200426	2	354	8.08004	0	1
		355	0.689781	4.71335	2	355	2.273	7.46368	4	355	13.0811	16.8337	4					355	13.4019	11.3704	4	355	14.0086	8.98778	3					355	17.3229	13.5281	4	355	2.71825	9.40074	4	355	1.22781	0.811641	2	355	8.03894	0	1
		356	0.630943	4.3385	2	356	2.57785	8.05219	4	356	12.9679	17.7286	4					356	13.3209	12.0591	4	356	14.0659	8.95055	3					356	17.3445	13.2529	4	356	2.78171	9.28436	4	356	1.46614	1.07117	2	356	7.73114	0	1
		357	0.352287	3.24379	2	357	2.77333	9.51064	4	357	12.6702	17.8851	4					357	13.2976	12.7496	4	357	13.745	8.95424	3					357	17.3968	13.6535	4	357	3.14308	8.54181	4	357	1.80823	1.22786	2	357	7.77877	0	1
		358	0.371597	3.64285	2	358	2.67878	9.53748	4	358	12.372	16.5598	4					358	13.2679	13.1327	4	358	13.5958	8.72622	3					358	17.4866	13.9914	4	358	3.49525	8.44363	4	358	1.9056	1.69091	2	358	7.91435	0	1
		359	0.0342636	3.93201	2	359	2.42403	8.81526	4	359	12.1874	14.8201	4					359	13.4263	12.9571	4	359	13.1702	8.65652	3					359	17.389	14.5266	4	359	3.38327	7.69586	4	359	2.26714	0.488052	2	359	7.88556	0	1
		360	0.0348587	4.18927	2	360	2.84986	8.5996	4	360	12.07	12.4557	4					360	13.4369	12.347	4	360	13.212	8.13076	3					360	17.3481	15.3898	4	360	3.56871	8.07669	4	360	1.91376	0.258205	2	360	8.23713	0	1
		361	0.0501404	4.49354	2	361	2.74926	11.3525	4	361	11.8857	13.4162	4					361	13.4369	11.769	4	361	12.8682	7.79601	3					361	17.1076	16.0163	4	361	4.00745	9.90691	4	361	1.87247	0.889118	2	361	8.10242	0	1
		362	0.107979	4.74798	2	362	2.68618	12.5484	4	362	11.7648	13.5861	4					362	13.5494	12.9142	4	362	12.9972	7.89134	3					362	16.7675	15.9483	4	362	4.05106	11.0971	4	362	1.89948	1.00381	2	362	8.21791	0	1
		363	0.0792465	4.65139	2	363	2.73091	11.5984	4	363	11.7443	13.0045	4					363	13.6559	13.833	4	363	12.7439	8.30805	3					363	16.6193	13.1886	4	363	4.11525	11.1662	4	363	1.72409	1.33912	2	363	8.22382	0	1
		364	0.018219	4.95432	2	364	2.93022	11.832	4	364	11.5794	13.5827	4					364	13.5644	14.3858	4	364	12.8676	8.55421	3					364	16.0668	11.8004	4	364	4.23691	11.1827	4	364	1.72499	1.17091	2	364	7.9916	0	1
		365	0.113441	4.79122	2	365	2.85551	12.6014	4	365	11.3902	14.3984	4					365	13.5861	13.8255	4	365	13.4125	9.18085	3					365	15.6457	11.1928	4	365	4.14995	11.424	4	365	1.73099	1.11196	2	365	8.00474	0	1
		366	0.0700226	3.80525	2	366	2.65791	12.8777	4	366	11.4077	13.7655	4					366	13.6318	14.8246	4	366	13.278	9.80066	3					366	15.1829	12.0019	4	366	3.67072	11.222	4	366	1.34427	1.32172	2	366	8.12127	0	1
		367	0.085022	3.70647	2	367	2.60544	12.0848	4	367	11.1581	13.583	4					367	13.8232	14.4534	4	367	13.4308	10.4872	3					367	15.0241	12.9746	4	367	3.42915	10.8929	4	367	0.938629	1.36796	2	367	8.10578	0	1
		368	0.00872803	3.98489	2	368	2.40541	11.7645	4	368	11.3179	13.081	4					368	13.8495	14.5642	4	368	13.5497	10.4947	3					368	14.9521	12.1048	4	368	3.41151	11.5015	4	368	0.884501	1.40234	2	368	8.04882	0	1
		369	0.21006	4.51509	2	369	2.32721	10.0835	4	369	11.1824	12.2647	4					369	13.8971	15.2259	4	369	13.5362	10.5597	3					369	14.7928	13.1724	4	369	3.68112	12.0938	4	369	0.748322	2.23274	2	369	8.28055	0	1
		370	0.161644	5.39822	2	370	2.54266	9.43673	4	370	11.1594	12.2187	4					370	14.0887	15.8723	4	370	13.4638	10.5911	3					370	14.5397	13.479	4	370	4.13237	13.8219	4	370	0.841122	1.37683	2	370	8.17331	0	1
		371	0.435799	6.32417	2	371	2.56621	8.83902	4	371	10.9369	11.9589	4					371	14.1756	16.5456	4	371	13.037	9.56558	3					371	14.3881	13.0351	4	371	4.19972	15.5053	4	371	1.22634	1.25793	2	371	8.14207	0	1
		372	0.381744	6.43448	2	372	2.52021	8.13933	4	372	11.4711	12.1406	4					372	14.2821	16.9616	4	372	13.0636	8.99121	3					372	14.2418	13.665	4	372	4.05524	16.1994	4	372	1.65332	1.20431	2	372	7.82994	0	1
		373	0.404678	6.40075	2	373	2.69132	7.95672	4	373	11.5198	12.1273	4					373	14.3323	16.9839	4	373	13.0983	8.81549	3					373	14.1666	14.4265	4	373	3.53967	17.4106	4	373	1.93425	1.34432	2	373	7.54556	0	1
		374	0.374725	7.13037	2	374	2.72303	7.34964	4	374	11.4617	13.1644	4					374	14.3385	15.9926	4	374	13.1853	9.07755	3					374	14.0929	14.2988	4	374	3.46976	18.6332	4	374	2.15987	1.49203	3	374	7.67149	0	1
		375	0.410042	7.55203	2	375	2.7551	6.47107	4	375	11.7266	14.5519	4					375	14.3312	16.1777	4	375	13.1824	9.29052	3					375	14.0845	14.2699	4	375	3.31429	17.7677	4	375	2.31232	0.906229	3	375	7.62991	0	1
		376	0.00656128	7.92726	2	376	2.78748	5.80403	4	376	11.5097	14.8442	4					376	14.1862	16.2335	4	376	13.1993	9.3983	3					376	13.8775	14.9828	4	376	2.6987	16.7908	4	376	2.59104	1.04714	3	376	7.6287	0	1
		377	0.168488	7.85591	2	377	2.64778	5.08618	4	377	11.451	16.1188	4					377	13.9931	15.9853	4	377	13.2852	9.40774	3					377	13.7614	15.4748	4	377	2.29942	16.7032	4	377	2.7824	1.30524	3	377	7.61707	0	1
		378	0.234108	5.53491	2	378	2.47989	4.55919	4	378	11.1543	16.5773	4					378	13.8938	15.7711	4	378	13.7048	9.17503	3					378	13.3246	15.3587	4	378	1.99147	15.3037	4	378	2.90955	1.04014	3	378	7.64215	0	1
		379	0.263191	5.57671	2	379	2.43734	4.7373	4	379	11.204	16.0934	4					379	13.823	15.842	4	379	13.3296	8.8488	3					379	13.271	14.0077	4	379	1.94986	14.2647	4	379	3.16899	1.24969	3	379	7.53321	0	1
		380	0.143654	5.332	2	380	2.51012	4.15539	4	380	10.9677	15.3817	4					380	13.7083	13.6786	4	380	13.4247	8.39664	3					380	13.7724	13.2221	4	380	2.04768	14.2783	4	380	3.36446	1.39196	3	380	7.41504	0	1
		381	0.216988	5.4009	2	381	2.39492	6.20281	4	381	10.5324	14.9359	4					381	13.5611	12.4767	4	381	13.9016	7.94448	3					381	13.7677	13.61	4	381	2.12247	14.5366	4	381	3.41131	1.14513	3	381	7.18154	0	1
		382	0.259438	6.53911	2	382	2.30745	7.15886	4	382	10.5806	15.3381	4					382	13.6265	11.6847	4	382	13.6833	7.59534	3					382	13.7308	13.903	4	382	2.15088	14.9004	4	382	3.41619	1.13433	3	382	7.28137	0	1
		383	0.458702	7.60578	2	383	2.13486	7.1087	4	383	10.7315	15.3443	4					383	13.7083	12.0266	4	383	13.6454	7.34305	3					383	13.3837	13.6835	4	383	2.64626	14.8652	4	383	3.38997	1.36396	3	383	7.12267	0	1
		384	0.554955	7.49338	2	384	2.35004	7.23292	4	384	11.2165	15.5387	4					384	13.6427	13.1959	4	384	13.7495	7.12018	3					384	12.9599	13.9982	4	384	2.75299	14.271	4	384	3.36162	2.10515	3	384	6.9324	4.37337	3
		385	0.658524	6.28405	2	385	2.57866	7.30969	4	385	11.2315	14.5651	4					385	13.6308	12.5893	4	385	13.6263	7.15089	3					385	13.0116	13.7238	4	385	2.77545	14.0686	4	385	3.22696	2.82458	3	385	6.75456	5.48093	3
		386	0.675407	6.51962	2	386	2.44611	6.6922	4	386	10.7538	13.8247	4					386	13.5434	10.9584	4	386	13.6127	7.1816	3					386	12.833	12.8084	4	386	2.7988	13.9623	4	386	3.19742	2.79748	3	386	6.58965	5.82664	3
		387	0.63118	6.74764	2	387	2.18835	6.321	4	387	10.7526	15.0962	4					387	13.6786	11.282	4	387	13.6506	7.25561	3					387	12.9685	11.6078	4	387	2.76175	14.7248	4	387	2.96687	3.3999	3	387	6.33307	5.84457	3
		388	0.642563	8.08614	2	388	2.56166	6.95662	4	388	10.9762	13.9312	4					388	13.6073	10.9901	4	388	13.4683	7.36266	3					388	12.9792	10.3174	4	388	2.65254	15.1346	4	388	3.23582	3.6672	3	388	6.14121	4.71054	3
		389	0.751152	8.0593	2	389	2.69366	7.48886	4	389	10.7991	14.3121	4					389	13.6609	11.5761	4	389	13.6066	7.40774	3					389	13.0764	10.0788	4	389	2.50674	16.1366	4	389	3.53449	3.44675	3	389	6.39236	4.77038	3
		390	0.602066	7.70742	2	390	2.76071	6.77881	4	390	10.7488	14.4994	4					390	13.665	10.9848	4	390	13.54	7.29169	3					390	13.0217	11.1312	4	390	2.54909	15.4117	4	390	3.30513	3.25212	3	390	6.4317	5.34575	3
		391	0.668579	6.76058	2	391	2.70684	5.35984	4	391	10.6557	13.6074	4					391	13.6175	11.857	4	391	13.4105	7.04724	3					391	13.0605	11.5127	4	391	2.43819	14.3774	4	391	2.8699	2.05044	3	391	6.30679	5.75631	3
		392	0.595444	7.33196	2	392	2.74033	4.58573	4	392	10.4955	12.7969	4					392	13.5479	11.1701	4	392	13.6046	6.72095	3					392	13.0455	11.1133	4	392	1.51974	14.7923	4	392	2.44869	2.02255	3	392	6.20272	5.49708	3
		393	0.41745	6.6141	2	393	2.80511	5.90408	4	393	10.4875	12.5955	4					393	13.5494	10.9543	4	393	13.5907	6.40541	3					393	13.1535	11.9111	4	393	1.88834	14.5544	4	393	2.19209	1.51063	3	393	6.09237	5.22812	3
		394	0.150215	7.76714	2	394	2.90089	5.70388	4	394	10.0614	11.2264	4					394	13.4158	11.7644	4	394	13.6924	6.45454	3					394	12.951	11.8325	4	394	1.94	14.8348	4	394	1.65039	1.39067	3	394	6.01467	4.9278	3
		395	0.00139618	7.67774	2	395	2.62037	6.00039	4	395	9.84828	10.7669	4					395	13.3606	13.5239	4	395	13.769	6.39882	3					395	12.625	12.1275	4	395	1.8445	16.0223	4	395	1.68783	1.55274	3	395	5.8828	4.4971	3
		396	0.0230103	7.52316	2	396	2.72175	5.79347	4	396	9.91526	10.4289	4					396	13.3316	14.3679	4	396	13.6036	6.26168	3					396	12.4188	13.5081	4	396	1.8732	16.7359	4	396	1.60663	1.18312	3	396	5.7724	4.32396	3
		397	0.049408	7.43089	2	397	2.91214	6.32821	4	397	9.43161	10.3047	4					397	13.4195	14.0185	4	397	13.2557	6.3581	3					397	12.2113	14.0305	4	397	1.90677	16.3438	4	397	1.52673	1.33854	3	397	5.58991	4.20337	3
		398	0.0600891	6.88998	2	398	2.91339	8.30675	4	398	9.08309	10.3988	4					398	13.401	12.9227	4	398	13.2582	6.68475	3					398	12.1042	13.7291	4	398	2.06952	16.8106	4	398	1.45709	1.531	3	398	5.34557	3.59328	3
		399	0.0971832	6.9137	2	399	2.83839	9.35184	4	399	8.81993	9.93649	4					399	13.3713	12.4745	4	399	13.6079	6.77469	3					399	12.0724	13.6824	4	399	2.29369	17.1363	4	399	1.66198	1.39903	3	399	5.42039	3.13108	3
		400	0.012291	7.28939	2	400	3.08418	8.89549	4	400	8.65774	10.1287	4					400	13.2457	12.4648	4	400	13.6707	6.74021	3					400	12.106	12.1603	4	400	2.39342	16.1463	4	400	1.90362	1.78435	3	400	5.47557	2.38851	3
		401	0.201469	8.11254	2	401	3.04407	8.05064	4	401	8.6478	9.40055	4					401	13.2311	12.5561	4	401	13.2556	6.43857	3					401	12.2159	11.2744	4	401	2.51016	15.7842	4	401	2.05003	2.12824	3	401	5.52628	1.70988	3
		402	0.0847626	7.66729	2	402	3.08344	9.74335	4	402	8.71354	10.2016	4					402	13.1815	12.4673	4	402	13.3046	6.37003	3					402	11.9708	11.0902	4	402	2.62456	15.6819	4	402	1.92908	3.42914	3	402	5.56121	0.990491	3
		403	0.0163116	6.30789	2	403	3.02488	10.4203	4	403	8.55801	11.9656	4					403	13.4365	12.852	4	403	13.2883	6.3021	3					403	11.8684	10.4365	4	403	2.51067	15.3963	4	403	1.90073	4.16058	3	403	5.57808	0	1
		404	0.0188904	5.04455	2	404	3.00289	10.6363	4	404	8.63628	11.1843	4					404	13.3743	13.6423	4	404	13.0786	6.15472	3					404	11.8376	10.5301	4	404	2.7245	12.5521	4	404	2.0669	4.35028	3	404	5.46378	0	1
		405	0.127838	4.99918	2	405	2.96288	9.50129	4	405	8.651	11.0236	4					405	13.3666	14.1675	4	405	13.1512	5.96879	3					405	11.8472	10.9278	4	405	2.73277	11.9615	4	405	2.10486	4.48976	3	405	5.22484	0	1
		406	0.153687	4.24365	2	406	3.25682	10.2296	4	406	8.62274	11.6688	4					406	13.4199	13.8453	4	406	12.944	5.47959	3					406	11.8023	10.8947	4	406	2.65242	11.6547	4	406	2.04022	5.35587	3	406	5.12353	0	1
		407	0.0914154	4.34174	2	407	3.44984	10.4901	4	407	8.53667	13.7106	4					407	13.2915	13.9451	4	407	12.6532	5.12321	3					407	11.8595	11.7026	4	407	2.793	11.5211	4	407	2.24899	5.06682	3	407	5.01691	0	1
		408	0.137573	6.52555	2	408	3.41256	9.48609	4	408	8.58752	13.8004	4					408	13.1531	13.8139	4	408	12.561	5.15777	3					408	12.2185	11.9251	4	408	2.85963	12.2198	4	408	2.24079	4.81277	3	408	4.89078	0	1
		409	0.316605	6.21008	2	409	3.26699	8.43166	4	409	8.6806	14.599	4					409	13.1076	13.5881	4	409	12.7087	5.32552	3					409	12.3417	12.8919	4	409	2.83437	12.8755	4	409	1.88383	4.4739	3	409	4.87617	0	1
		410	0.755997	7.25764	2	410	3.81809	8.40827	4	410	8.70202	13.7288	4					410	13.3211	13.6607	4	410	12.7154	5.43498	3					410	12.4544	13.0396	4	410	2.83723	11.5027	4	410	2.16968	4.61015	3	410	4.78349	0	1
		411	0.739868	7.25981	2	411	3.73373	8.94124	4	411	8.72442	13.15	4					411	13.3738	13.4363	4	411	12.8058	5.82192	3					411	12.5076	14.3433	4	411	3.01996	7.78588	4	411	1.90726	4.78014	3	411	4.69184	0	1
		412	0.955856	7.64332	2	412	4.08022	8.87945	4	412	8.85604	12.7406	4					412	13.4025	13.546	4	412	12.6759	6.53448	3					412	12.2893	15.5405	4	412	3.38528	8.45667	4	412	1.72282	4.90907	3	412	4.47478	0	1
		413	1.19202	7.50761	2	413	3.80505	9.82198	4	413	8.9601	11.8548	4					413	13.5053	13.1616	4	413	12.5486	7.16819	3					413	11.8734	15.6638	4	413	3.43175	9.26183	4	413	1.90671	4.91459	3	413	4.54671	0	1
		414	1.27685	6.76514	2	414	3.83654	11.3926	4	414	9.00125	12.0255	4					414	13.3673	12.9855	4	414	12.6279	7.2379	3					414	11.3538	16.8429	4	414	3.45926	8.04744	4	414	1.91994	5.29929	3	414	5.24817	0	1
		415	1.42332	7.84309	2	415	3.94004	11.3218	4	415	9.11251	12.2983	4					415	13.219	12.7552	4	415	12.3078	6.93966	3					415	11.2133	16.9914	4	415	3.39578	5.67297	4	415	1.93478	5.0961	3	415	5.12773	0	1
		416	1.24513	7.67275	2	416	3.58877	11.4366	4	416	9.14296	14.3251	4					416	13.2142	12.8501	4	416	12.3713	6.8316	3					416	11.3843	16.5942	4	416	13.0098	6.36663	4	416	1.80263	5.16966	3	416	4.89896	0	1
		417	1.26318	6.60359	2	417	3.6556	12.4734	4	417	9.17175	15.5636	4					417	13.1679	12.8319	4	417	11.9628	6.992	3					417	11.6421	15.9793	4	417	13.1332	7.29345	4	417	1.74857	5.25225	3	417	4.59187	0	1
		418	1.08418	6.80741	2	418	3.99638	11.1753	4	418	9.29246	15.2685	4					418	13.2309	12.947	4	418	12.1323	7.20029	3					418	12.3367	14.9521	4	418	12.9312	8.06718	4	418	1.59336	4.79725	3	418	4.75972	0	1
		419	1.00975	3.83252	2	419	3.74171	10.3377	4	419	9.25877	14.9939	4					419	13.1935	12.7309	4	419	12.0173	7.3833	3					419	12.6234	14.6766	4	419	12.717	7.64081	4	419	1.72383	4.29043	3	419	4.53058	0	1
		420	1.11578	8.75991	2	420	3.60658	10.6448	4	420	9.36611	15.204	4					420	13.1796	13.1739	4	420	12.4214	7.85183	3					420	12.8513	14.2386	4	420	13.0294	7.91981	4	420	1.90344	3.80776	3	420	4.47708	0	1
		421	0.788826	8.48801	2	421	3.65261	8.7697	4	421	9.50398	17.7572	4					421	13.246	13.1226	4	421	12.4052	9.68171	3					421	13.1579	13.0297	4	421	13.3229	7.92918	4	421	1.61612	3.49383	3	421	4.32714	0.738846	3
		422	0.733116	8.04847	2	422	3.93337	9.26639	4	422	9.43694	18.9551	4					422	13.1581	13.1714	4	422	12.1436	11.8447	3					422	13.4101	13.013	4	422	13.2546	8.55399	4	422	1.49416	3.63778	3	422	4.43096	1.21166	3
		423	0.883369	7.66865	2	423	3.98038	10.0169	4	423	9.56437	19.7993	4					423	13.162	12.8193	4	423	12.4079	13.2485	3					423	13.4987	13.4934	4	423	13.3334	8.29933	4	423	1.46311	3.87467	3	423	4.20683	0.660135	3
		424	0.851089	7.95973	2	424	3.71329	10.6258	4	424	9.34383	20.0533	4					424	13.2901	11.9907	4	424	12.3761	14.0454	4					424	13.394	11.5983	4	424	13.246	6.45913	4	424	1.40464	3.39558	3	424	4.31592	1.98608	3
		425	0.756302	6.945	2	425	3.5192	9.93248	4	425	9.43356	20.3467	4					425	13.1759	12.0036	4	425	12.6492	14.828	4					425	13.3175	11.6643	4	425	13.5429	3.5634	4	425	1.48945	3.45895	3	425	4.44143	2.96414	3
		426	0.894356	6.31889	2	426	3.33559	6.23013	4	426	9.57987	19.9293	4					426	13.1534	11.6865	4	426	12.8394	14.9496	4					426	13.3105	11.5212	4	426	13.2073	3.86162	4	426	1.4481	3.29942	3	426	4.37757	3.76586	3
		427	0.846497	5.91655	2	427	4.61238	6.06428	4	427	9.59455	20.8966	4					427	13.0641	11.6407	4	427	12.6036	15.16	4					427	12.8512	12.0792	4	427	12.8918	5.38598	4	427	1.6402	3.45115	3	427	4.29406	3.90942	3
		428	0.960495	5.67461	2	428	4.45478	5.14432	4	428	9.74937	20.8356	4					428	12.9683	11.8458	4	428	12.5471	15.5001	4					428	12.9485	12.8672	4	428	12.2395	3.9615	4	428	1.65137	2.6963	3	428	4.30424	3.59404	3
		429	0.684799	6.13832	2	429	4.82109	6.30325	4	429	9.96169	20.2505	4					429	12.9477	11.8598	4	429	12.5935	15.4756	4					429	13.2964	12.7906	4	429	11.0922	3.69285	4	429	1.54925	2.22426	3	429	4.23349	3.68671	3
		430	0.845184	5.87611	2					430	10.1078	21.6284	4					430	13.0051	11.313	4	430	12.854	15.2838	4					430	13.4803	11.6499	4	430	9.7242	2.39541	4	430	1.55189	1.53119	3	430	4.20145	3.79468	3
		431	0.856827	5.82138	2					431	10.245	22.1481	4					431	12.8955	11.5333	4	431	12.5942	15.1524	4					431	13.4678	11.6426	4	431	8.44894	1.7149	4	431	1.67539	1.31885	3	431	4.37133	4.09678	3
		432	1.03731	5.40833	2					432	10.3654	21.2898	4					432	12.9063	11.987	4	432	12.6763	15.2242	4					432	13.735	10.4374	4	432	8.72115	1.38784	4	432	1.68891	0.980156	3	432	4.57482	3.81555	3
		433	0.922783	5.34152	2					433	10.4781	20.4235	4					433	13.0095	12.1861	4	433	12.9343	15.0936	4					433	14.1422	10.0657	4	433	9.51257	0.845532	4	433	1.71871	1.36208	3	433	4.61277	4.09302	3
		434	0.415802	4.86042	2					434	10.5402	20.4308	4					434	12.888	12.1725	4	434	12.8344	15.3942	4					434	14.288	11.3977	4	434	10.0199	0.754814	4	434	1.78772	2.47903	3	434	4.51908	4.32765	3
		435	0.0632324	4.60493	2					435	10.6642	21.4533	4					435	12.9314	12.0294	4	435	12.983	16.0336	4					435	14.2798	10.3895	4	435	11.3776	0.752969	4	435	1.77864	2.69957	3	435	4.4817	4.49516	3
		436	0.267365	5.04555	2					436	10.7539	21.5172	4					436	13.0112	11.821	4	436	13.1273	16.5184	4					436	14.3151	10.5496	4	436	11.6324	0.612561	4	436	1.934	3.13547	3	436	4.30171	4.94726	3
		437	0.720055	6.11179	2					437	10.7325	21.2064	4					437	12.991	11.7465	4	437	13.1579	16.6051	4					437	14.2981	10.0481	4	437	11.5133	0.605631	4	437	2.1381	2.45392	3	437	4.51128	5.0288	3
		438	1.07107	6.16682	2					438	10.8049	21.0608	4					438	12.9973	11.74	4	438	13.3828	16.8698	4					438	14.2496	9.27167	4	438	11.4927	1.73819	4	438	2.26865	3.32642	3	438	4.62131	4.86498	3
		439	1.05936	6.03626	2					439	10.958	20.6254	4					439	12.9702	11.4887	4	439	13.2005	16.8984	4					439	14.2197	9.51063	4	439	11.6326	1.65297	4	439	2.17758	3.55311	3	439	4.53549	4.88435	3
		440	0.957077	6.13586	2					440	11.0748	19.8967	4					440	13.0251	11.0805	4	440	13.3895	16.8347	4					440	14.1813	10.3138	4	440	11.6628	4.12276	4	440	2.20995	2.80752	3	440	4.58789	4.72548	3
		441	1.07401	5.3849	2					441	10.9591	18.7251	4					441	13.1029	10.5983	4	441	13.2275	16.4536	4					441	14.1473	11.5188	4	441	11.6619	3.67592	4	441	2.19184	3.46556	3	441	4.80411	4.27761	3
		442	0.996017	5.7592	2					442	10.9993	19.786	4					442	13.1582	10.2825	4	442	13.3809	16.0773	4					442	14.1618	11.6491	4	442	10.9972	4.12288	4	442	2.3805	3.49315	3	442	4.89651	5.09012	3
		443	1.00559	5.83175	2					443	11.0545	19.333	4					443	13.1977	10.0436	4	443	13.3477	15.9301	4					443	14.1524	12.0177	4	443	9.73677	3.9148	4	443	2.58165	1.66011	3	443	5.00492	4.65723	3
		444	0.973198	5.48485	2					444	11.007	18.1406	4					444	13.0839	9.79555	4	444	13.0543	15.8442	4					444	14.1476	13.1811	4	444	8.85808	3.23297	4	444	2.59855	1.20161	3	444	5.02298	3.3679	3
		445	1.0586	5.51749	2					445	11.0064	17.788	4					445	13.1887	9.59766	4	445	13.2644	15.6969	4					445	14.0605	13.5528	4	445	8.61305	1.92623	4	445	2.43128	1.67338	3	445	5.07141	3.62447	3
		446	1.19823	5.59541	2					446	10.8381	17.1845	4					446	13.0631	9.43351	4	446	13.0687	15.6797	4					446	14.1819	12.9203	4	446	8.77252	1.74241	4	446	2.508	1.52091	3	446	5.09357	3.68589	3
		447	1.20023	6.90402	2					447	10.8032	16.4992	4					447	13.0743	9.04737	4	447	13.0531	15.8737	4					447	14.2186	12.1283	4	447	8.98843	7.31466	4	447	2.47454	1.17785	3	447	5.00871	3.41446	3
		448	1.25587	7.06216	2					448	10.7204	17.2655	4					448	13.1115	8.91635	4	448	13.1328	16.1231	4					448	14.3155	11.4019	4	448	8.46635	9.68175	4	448	2.51922	2.29221	3	448	4.90816	2.91433	3
		449	1.2349	7.29545	2					449	10.756	16.9609	4					449	13.1278	8.51717	4	449	12.7245	16.4905	4					449	14.5648	12.2315	4	449	8.67038	11.2661	4	449	2.59879	2.89274	3	449	4.81761	3.39338	3
		450	1.149	7.54711	2					450	10.8049	19.9651	4					450	13.0287	8.33632	4	450	12.7627	17.206	4					450	14.5805	11.9516	4	450	8.56888	11.8418	4	450	2.63844	3.0436	3	450	4.67103	3.59608	3
		451	1.26836	6.55875	2					451	10.6791	19.0738	4					451	12.9919	8.61438	4	451	12.5473	16.3857	4					451	14.5595	11.495	4	451	8.02692	11.4994	4	451	2.62624	2.05573	3	451	4.56386	3.44492	3
		452	1.4297	5.73119	2					452	9.98583	17.3904	4					452	13.0099	8.98482	4	452	12.7725	16.8582	4					452	14.6319	11.4242	4	452	8.07977	11.2308	4	452	2.68183	2.67904	3	452	4.5972	2.81117	3
		453	1.34504	5.34337	2					453	9.85964	17.3521	4					453	13.0446	9.01165	4	453	12.6581	17.0043	4					453	14.5702	9.85248	4	453	8.18239	10.9155	4	453	2.70038	2.50421	3	453	4.56606	3.08392	3
		454	1.46414	3.28163	2					454	10.0274	17.6551	4					454	13.2245	9.01327	4	454	12.34	16.6162	4					454	14.5999	6.76804	4	454	7.85252	9.60746	4	454	2.97249	2.27598	3	454	4.46225	2.7813	3
		455	1.26497	3.07044	2					455	10.797	17.5807	4					455	13.2816	9.23719	4	455	12.5583	16.2533	4					455	14.558	7.43329	4	455	7.68251	10.7998	4	455	2.89284	2.69968	3	455	4.34276	2.67121	3
		456	1.3308	3.50242	2					456	10.7201	17.0724	4					456	13.3958	9.2153	4	456	12.5433	17.7462	4					456	14.5588	7.89398	4	456	7.40544	9.24998	4	456	2.86266	3.19082	3	456	4.34603	2.66764	3
		457	1.22286	3.02342	2					457	11.1123	17.7713	4					457	13.5346	9.37469	4	457	12.4801	18.3446	4					457	14.4276	7.8067	4	457	7.80069	8.44977	4	457	2.9568	4.29961	3	457	4.29822	2.14224	3
		458	1.12724	1.5122	2					458	11.1654	18.1168	4					458	13.5785	9.56004	4	458	12.1533	18.2279	4					458	14.3688	7.77775	4	458	8.1593	8.15314	4	458	2.99533	3.85424	3	458	4.54413	2.50737	3
		459	1.00727	1.38252	2					459	10.8194	18.5376	4					459	13.6339	9.27722	4	459	12.4782	17.5825	4					459	14.3162	7.78253	4	459	8.88608	8.67543	4	459	2.96668	3.66999	3	459	4.26497	0	1
		460	0.866028	3.88221	2					460	10.8496	18.1466	4					460	13.6381	9.82903	4	460	12.601	16.4833	4					460	14.3291	6.70764	4	460	8.64708	8.25506	4	460	3.08985	3.80373	3	460	4.047	0	1
		461	0.722115	5.12208	2					461	10.9261	17.6307	4					461	13.5065	10.0067	4	461	12.6024	15.2607	4					461	14.279	7.83524	4	461	6.90067	9.36505	4	461	3.01391	3.25892	3	461	4.17666	0	1
		462	0.756424	5.70477	2					462	10.8571	19.5171	4					462	13.4102	9.66401	4	462	12.402	14.5936	4					462	14.1618	8.27761	4	462	6.06563	8.25817	4	462	3.11047	2.3122	3	462	3.86326	0	1
		463	0.948151	6.10852	2					463	10.9599	19.6817	4					463	13.6991	7.77673	4	463	12.5552	14.6794	4					463	14.1215	9.2044	4	463	6.19551	9.60875	4	463	3.04227	0.714608	3	463	3.49335	0	1
		464	1.17686	3.76161	2					464	10.963	19.1433	4					464	13.8307	6.85451	4	464	12.9066	14.7121	4					464	14.0568	10.6162	4	464	6.85046	8.52356	4	464	3.23994	1.4392	3	464	3.36341	0	1
		465	1.17135	4.34668	2					465	10.6518	18.6491	4					465	13.8928	7.03596	4	465	12.7781	14.4753	4					465	13.9894	10.1951	4	465	8.12668	7.2777	4	465	3.2077	2.26946	3	465	3.47177	0	1
		466	1.38832	4.61408	2					466	11.0261	19.0234	4					466	13.9134	7.43881	4	466	12.376	14.3523	4					466	14.0641	8.78861	4	466	9.38911	6.4996	4	466	3.18091	2.19638	3	466	3.4601	0	1
		467	1.64321	6.23524	2					467	10.8813	18.9075	4					467	13.951	7.29004	4	467	12.5069	14.677	4					467	13.9776	8.35911	4	467	10.1123	7.66329	4	467	3.10957	1.05968	3	467	3.51677	0	1
		468	1.43225	6.36572	2					468	10.6455	19.0343	4					468	13.944	7.37468	4	468	12.5862	14.7133	4					468	13.9064	7.98267	4	468	9.14963	6.83849	4	468	2.76969	1.41802	3	468	3.63826	0	1
		469	1.46578	5.62476	2					469	10.4588	19.1178	4					469	13.9807	7.44375	4	469	12.341	14.7358	4					469	13.8425	7.87778	4	469	7.77139	10.5544	4	469	2.98614	1.64083	3	469	3.62352	0	1
		470	1.74915	5.85373	2					470	10.2784	17.9037	4					470	14.0134	7.63795	4	470	12.0603	15.2626	4					470	13.8704	8.92231	4	470	7.60016	13.2341	4	470	3.14707	1.93106	3	470	3.70804	0	1
		471	1.50393	6.31798	4					471	10.0547	17.7166	4					471	14.0316	7.68037	4	471	11.9797	15.73	4					471	13.7558	8.82603	4	471	7.08096	16.0977	4	471	3.06901	2.10102	3	471	3.71481	0	1
		472	1.3511	5.88069	4					472	10.0104	18.2798	4					472	13.878	7.6789	4	472	12.1488	15.668	4					472	13.7746	9.52619	4	472	6.88783	17.6025	4	472	3.19181	1.80854	3	472	3.57358	0	1
		473	1.22983	6.07184	4					473	9.97499	18.6653	4					473	13.7884	7.98395	4	473	12.1054	15.1204	4					473	13.7022	9.59855	4	473	7.13347	18.2072	4	473	3.28073	1.74626	3	473	3.58836	0	1
		474	1.51141	5.89279	4					474	9.80348	19.4637	4					474	13.7097	7.918	4	474	12.2471	14.9225	4					474	13.5268	9.32567	4	474	7.80656	15.7678	4	474	3.25465	1.6736	3	474	3.45464	0	1
		475	1.55473	5.6066	4					475	9.7679	16.8208	4					475	13.6308	7.57766	4	475	12.076	14.7779	4					475	13.4811	9.09687	4	475	9.69989	15.5362	4	475	2.99853	1.91209	3	475	3.55078	0	1
		476	1.55634	4.54207	4					476	10.0214	15.4109	4					476	13.719	7.10742	4	476	12.0139	14.5395	4					476	13.5452	10.1323	4	476	10.8452	15.6529	4	476	2.94809	1.71493	3	476	3.62117	0	1
		477	1.46499	4.17504	4					477	9.68534	15.0501	4					477	13.7578	7.73063	4	477	12.0266	14.1018	4					477	13.5727	9.83147	4	477	10.9991	16.4919	4	477	3.2158	1.64494	3	477	3.81644	0	1
		478	1.44434	4.93151	4					478	9.59646	14.326	4					478	13.7331	7.69916	4	478	11.9397	13.6558	4					478	13.4664	10.6455	4	478	11.0464	19.3575	4	478	3.16118	1.8185	3	478	3.89456	0	1
		479	1.47698	5.15563	4					479	9.58723	12.5745	4					479	13.7536	8.04301	4	479	11.7199	13.197	4					479	13.3394	10.5518	4	479	10.9327	17.9184	4	479	3.03612	1.29684	3	479	4.0283	0	1
		480	1.47705	5.26866	4					480	9.1974	11.9396	4					480	13.7367	7.96964	4	480	11.4354	12.7382	4					480	13.2488	10.4221	4	480	10.4339	15.6901	4	480	3.05735	1.41611	3	480	4.07269	0	1
		481	1.3642	5.2137	4					481	9.25694	13.6212	4					481	13.7538	8.15293	4	481	11.3141	11.5741	4					481	13.1589	9.76455	4	481	8.37172	14.2111	4	481	3.37132	1.74908	3	481	4.0654	0	1
		482	1.11079	5.4944	4					482	9.10744	13.4384	4					482	13.8865	9.07931	4	482	11.7326	10.2952	4					482	13.1162	9.48962	4	482	7.70804	14.0603	4	482	3.46994	1.62503	3	482	4.05983	0	1
		483	1.0556	6.37793	4					483	9.23433	13.3291	4					483	13.9969	9.21938	4	483	11.4002	8.92728	4					483	13.0556	8.38238	4	483	7.69775	14.4215	4	483	3.29884	1.72127	3	483	4.32025	0	1
		484	0.94973	6.20542	4					484	9.63564	13.0632	4					484	14.0447	9.59632	4	484	11.3993	8.13943	4					484	13.0472	8.20482	4	484	7.61406	16.1495	4	484	3.41816	0.897075	3	484	4.38233	0	1
		485	0.862892	6.50871	4					485	9.64059	12.9686	4					485	14.0136	9.59871	4	485	11.4756	6.81152	4					485	12.9873	7.73255	4	485	7.78946	16.5086	4	485	3.31036	1.07345	3	485	4.42402	0	1
		486	0.894524	6.33453	4					486	9.73661	13.7258	4					486	14.0783	8.95823	4	486	10.9672	6.525	4					486	13.0896	7.45881	4	486	7.62834	16.9053	4	486	3.44431	1.20743	3	486	4.73039	0	1
		487	1.10216	4.98228	4					487	9.62162	13.7333	4					487	14.11	8.69451	4	487	11.1521	6.72993	4					487	13.0089	8.10252	4	487	7.59187	17.4828	4	487	3.71656	1.08546	3	487	5.04054	0	1
		488	1.26681	3.41963	4					488	9.67766	13.5498	4					488	13.9051	8.64411	4	488	11.1884	6.44748	4					488	13.0413	7.75376	4	488	7.61217	17.0638	4	488	3.7529	0.987867	3	488	5.20461	0	1
		489	1.18842	3.45041	4					489	9.49819	13.0274	4					489	13.9018	8.32398	4	489	10.9248	6.10232	4					489	13.0419	7.72497	4	489	7.72005	15.9809	4	489	3.89716	0.958048	3	489	5.32591	0	1
		490	1.32121	3.56065	4					490	10.0142	12.958	4					490	13.9023	7.97835	4	490	10.893	5.99739	4					490	12.9811	7.85791	4	490	7.90569	15.7322	4	490	3.86404	0.876201	3	490	5.35658	0	1
		491	1.38663	3.24836	4					491	10.0956	13.6949	4					491	13.9494	8.02459	4	491	10.7339	6.12215	4					491	12.8931	7.04747	4	491	8.86406	15.4661	4	491	3.75631	2.02341	3	491	4.85914	0	1
		492	1.44019	3.47101	4					492	10.0876	13.085	4					492	13.9434	7.96142	4	492	10.925	6.07289	3					492	12.6631	6.4273	4	492	9.5188	17.6422	4	492	3.77623	1.53511	3	492	4.83175	0	1
		493	1.54813	4.24877	4					493	9.8445	12.1304	4					493	14.0105	7.94888	4	493	10.6718	6.11877	3					493	12.4407	6.88263	4	493	9.90826	19.0104	4	493	3.83771	1.25492	3	493	4.94765	0	1
		494	1.47363	5.47657	4					494	10.0773	12.2593	4					494	13.9744	6.26329	4	494	10.794	7.14526	3					494	12.4649	6.51785	4	494	9.85886	19.5905	4	494	3.65177	1.2895	3	494	5.14602	0	1
		495	1.51671	5.04875	4					495	10.1023	12.2534	4					495	14.0336	7.03803	4	495	10.8603	7.72885	3					495	12.354	5.71959	4	495	10.0667	20.7821	4	495	3.70117	1.48069	3	495	5.48915	0	1
		496	1.52522	4.7996	4					496	10.2366	12.8299	4					496	13.7637	7.75441	4	496	11.0483	8.09899	3					496	12.2828	5.90567	4	496	10.0528	20.9649	4	496	3.69642	1.25608	3	496	5.34314	0	1
		497	1.68169	4.77363	4					497	10.1537	12.571	4					497	13.7733	7.74806	4	497	10.9343	8.04063	3					497	12.1787	5.94447	4	497	10.0065	20.8931	4	497	3.63844	1.40038	3	497	5.28174	0	1
		498	1.6368	5.27653	4					498	10.0726	12.6369	4					498	13.9002	7.64889	4	498	10.8956	7.37622	3					498	12.1113	5.25095	3	498	9.88177	20.8836	4	498	3.65119	1.47357	3	498	5.18013	0	1
		499	1.57678	5.35798	4					499	10.0537	13.7726	4					499	13.8616	7.39977	4	499	10.5909	6.37036	3					499	12.0322	5.73165	3	499	10.0209	23.3549	4	499	3.66458	1.62314	3	499	5.28805	0	1
		500	1.82542	4.89426	4					500	9.85262	12.8948	4					500	13.7817	7.94391	4	500	10.5634	5.72544	3					500	11.9622	5.8579	3	500	9.94862	22.5341	4	500	3.69073	1.47725	3	500	5.26348	0	1
		501	1.95664	6.40512	4					501	10.128	12.665	4					501	13.8571	8.43126	4	501	10.4617	5.83215	3					501	11.9355	6.3478	3	501	9.51537	20.8777	4	501	3.75138	1.43151	3	501	5.32441	0	1
		502	1.79823	6.26887	4					502	9.77621	12.1559	4					502	13.8067	9.12529	4	502	10.2233	6.12536	3					502	11.939	6.64327	3	502	7.38483	18.5853	4	502	3.96212	1.51601	3	502	5.26163	0	1
		503	1.59889	6.70455	4					503	10.0092	11.9641	4					503	13.8195	9.42379	4	503	10.3715	6.08501	3					503	11.8447	6.55641	3	503	7.36559	20.0981	4	503	4.28602	1.35599	3	503	5.24109	0	1
		504	1.82492	5.5676	4					504	9.91605	12.3759	4					504	13.7696	9.22555	4	504	10.2228	5.71946	3					504	11.5981	6.57778	3	504	7.73608	22.2685	4	504	4.06462	1.52381	3	504	5.47955	1.86045	3
		505	1.68263	5.41608	4					505	9.96519	12.6363	4					505	13.7631	8.42487	4	505	9.94424	5.62964	3					505	11.5768	6.79342	3	505	7.7923	23.5763	4	505	3.96714	1.19055	3	505	5.3756	4.45827	3
		506	1.62829	4.57298	4					506	9.83347	11.4822	4					506	13.7237	8.04668	4	506	10.3226	5.57708	3					506	11.3151	6.60508	3	506	7.74919	23.5253	4	506	3.95155	1.30814	3	506	5.50026	4.3459	3
		507	1.62595	4.08704	4					507	9.75708	11.8883	4					507	13.7585	7.89525	4	507	10.2162	5.72743	3					507	11.4327	6.42324	3	507	7.65399	23.3059	4	507	3.85613	1.16291	3	507	5.54873	4.18724	3
		508	1.64899	5.74712	4					508	9.81252	12.2824	4					508	13.7384	8.05877	4	508	10.1461	5.56953	3					508	11.5974	6.01108	3	508	9.16745	22.7162	4	508	3.83792	1.28712	3	508	5.61103	4.34403	3
		509	1.6777	6.70135	4					509	10.0719	12.3597	4					509	13.6686	8.14406	4	509	10.0908	5.34088	3					509	11.403	6.2594	3	509	9.0089	21.7369	4	509	3.5582	0.884666	3	509	5.61405	4.94587	3
		510	1.51846	7.1968	4					510	10.2698	13.3709	4					510	13.6744	8.13199	4	510	10.0137	5.32169	3					510	11.5192	6.07512	3	510	7.18765	21.0794	4	510	3.4059	0.619291	3	510	5.71052	4.32011	3
		511	1.45802	7.32475	4													511	13.7716	7.88476	4	511	9.86047	5.3025	3					511	11.4298	6.02091	3	511	7.08389	18.1304	4	511	3.4397	0.669785	3	511	5.74907	3.94893	3
		512	1.14359	8.03977	4													512	13.8788	7.7018	4	512	9.87122	5.22448	3					512	11.2652	6.03917	3	512	6.63181	19.9908	4	512	3.29793	0.95333	3	512	5.79296	3.56017	3
		513	0.9702	8.01422	4													513	13.851	7.80012	4	513	10.2143	5.17831	3					513	11.2149	6.15945	3	513	7.34595	23.7245	4	513	3.29521	0.934764	3	513	5.71779	3.73743	3
		514	0.580391	7.39759	4													514	13.7563	8.11128	4	514	10.3452	5.13214	3					514	11.1826	5.55455	3	514	8.00664	24.0375	4	514	3.2932	0.956453	3	514	5.41663	3.96405	3
		515	0.508003	6.05128	4													515	13.7813	7.59361	4	515	10.3009	5.09447	3					515	11.208	4.97693	3	515	7.84422	22.5805	4	515	3.2206	1.88878	3	515	5.46658	4.21062	3
		516	0.0146942	5.84502	4													516	13.7776	7.03071	4	516	10.5524	5.05108	3					516	11.336	5.20323	3	516	8.37126	22.8125	4	516	3.17481	3.17071	3	516	5.51528	3.05761	3
		517	0.00621033	5.57212	4													517	13.7712	6.63298	4	517	10.1279	4.95239	3					517	11.4561	5.0215	3	517	8.42928	23.4645	4	517	2.99064	3.81726	3	517	5.53736	3.83734	3
		518	0.0938797	6.454	4													518	13.7732	7.10953	4	518	10.1541	4.85741	3					518	11.4041	4.79442	3	518	8.71947	23.299	4	518	3.15688	4.00513	3	518	5.741	3.54352	3
		519	0.135963	6.7066	4													519	13.776	7.03869	4	519	10.0442	4.77353	3					519	11.4628	5.11379	3	519	8.75919	23.8964	4	519	3.06106	4.13001	3	519	6.14838	3.29116	3
		520	0.0128784	7.34942	4													520	13.6898	7.13214	4	520	10.4626	4.64181	3					520	11.3652	4.92676	3	520	8.78674	26.0047	4	520	2.88682	4.34411	3	520	6.37666	3.44133	3
		521	0.055809	7.55426	4													521	13.7075	7.35017	4	521	10.442	4.28415	3					521	11.3443	5.73587	3	521	8.6955	24.3581	4	521	2.87215	5.02115	3	521	6.36958	3.72393	3
		522	0.228806	7.94205	4													522	13.7119	7.33725	4	522	10.1672	4.01371	3					522	11.3456	5.26386	3	522	8.56754	23.1517	4	522	2.8101	5.67829	3	522	6.31584	2.92047	3
		523	0.36348	8.52804	4													523	13.7069	7.96766	4	523	10.4722	4.22419	3					523	11.1898	5.14909	3	523	8.87979	22.2507	4	523	2.74034	5.989	3	523	6.29713	3.5886	3
		524	0.410728	9.28183	4													524	13.7598	8.70369	4	524	10.5741	4.40946	3					524	11.1598	5.19525	3	524	8.68428	21.1206	4	524	2.83926	5.60775	3	524	6.26157	4.00659	3
		525	0.571358	9.30783	4													525	13.6794	9.15086	4	525	10.3166	4.32559	3					525	11.0681	4.30325	3	525	8.64232	20.1923	4	525	2.8082	5.43818	3	525	6.21689	3.49282	3
		526	0.667259	9.50188	4													526	13.7723	8.80023	4	526	10.5181	4.24171	3					526	11.0147	3.85519	3	526	8.27977	20.0012	4	526	2.81207	5.47107	3	526	6.16588	3.31303	3
		527	0.522026	9.33997	4													527	13.6475	8.81778	4	527	10.3855	3.99711	3					527	11.0492	4.08903	3	527	8.73431	17.8595	4	527	2.69999	5.54861	3	527	5.95345	2.9392	3
		528	0.572426	9.37801	4													528	13.6966	8.36006	4	528	10.4489	3.74135	3					528	11.092	5.01142	3	528	8.90355	17.6094	4	528	2.60286	5.30756	3	528	5.57666	1.59002	3
		529	0.711708	8.93093	4													529	13.7203	8.59911	4	529	10.4881	3.49026	3					529	11.1021	5.05243	3	529	8.94951	18.8666	4	529	2.57579	4.97189	3	529	5.33534	2.72622	3
		530	0.829948	9.11272	4													530	13.7527	8.65659	4	530	10.5853	3.23918	3					530	11.0089	5.52716	3	530	9.00027	19.8461	4	530	2.53091	4.79976	3	530	5.26837	2.96457	3
		531	0.919067	9.02779	4													531	13.6691	8.68037	4	531	10.8908	3.02034	3					531	10.9725	5.19226	3	531	9.37912	19.3805	4	531	2.61019	4.63054	3	531	5.20827	2.06828	3
		532	0.906921	8.63104	4													532	13.7696	9.15761	4	532	10.9677	3.35328	3					532	11.2693	5.27641	3	532	9.32027	19.3432	4	532	2.38397	4.16711	3	532	5.08668	1.67735	3
		533	0.841949	8.64072	4													533	13.8113	9.36648	4	533	10.9179	4.17161	3					533	11.376	4.8981	3	533	8.99892	19.1029	4	533	2.32275	3.8877	3	533	4.98554	2.26406	3
		534	0.880371	9.32836	4													534	13.5517	9.47992	4	534	10.6854	4.29744	3					534	11.6302	5.16984	3	534	8.20018	15.9991	4	534	2.36412	3.59706	3	534	5.07292	2.62137	3
		535	0.870605	9.98873	4													535	13.5194	9.37632	4	535	11.3232	4.26025	3					535	11.7485	5.14307	3	535	7.37976	15.9923	4	535	2.46305	3.53419	3	535	5.21855	1.95831	3
		536	1.06799	10.2912	4													536	13.4724	9.30612	4	536	11.0005	3.96712	3					536	11.7644	4.69727	3	536	6.77632	15.8992	4	536	2.25906	3.62071	3	536	5.28201	2.14476	3
		537	1.18295	10.3776	4													537	13.4899	8.90544	4	537	10.8553	3.90809	3					537	11.7419	4.49937	3	537	6.83318	18.3101	4	537	2.46623	4.32537	3	537	5.31969	1.61055	3
		538	1.24371	9.66384	4													538	13.5389	8.72008	4	538	10.9791	3.98545	3					538	11.6321	4.3958	3	538	7.10881	17.6498	4	538	2.51657	6.4063	3	538	5.32478	1.59008	3
		539	1.32516	9.59037	4													539	13.5752	8.46283	4	539	11.2079	3.99453	3					539	11.6067	4.67887	3	539	7.02898	16.9939	4	539	2.72758	5.7573	3	539	5.29793	2.14698	3
		540	1.55652	8.9843	4													540	13.4561	8.35258	4	540	10.9519	3.85949	3					540	11.7008	4.70947	3	540	6.92451	16.4136	4	540	2.86326	5.0585	3	540	5.27327	2.23577	3
		541	1.54866	8.61309	4													541	13.4812	8.35793	4	541	10.9255	3.70017	3					541	11.6542	4.86908	3	541	7.31679	15.6864	4	541	2.94626	4.62494	3	541	5.40388	1.85789	3
		542	1.60949	9.54168	4													542	13.3532	8.28864	4	542	11.1309	3.5416	3					542	11.6817	4.01366	3	542	6.71541	15.1161	4	542	2.84903	4.55277	3	542	5.3106	1.9807	3
		543	1.90274	8.68086	4													543	13.3442	8.86011	4	543	11.381	3.89973	3					543	11.4832	4.28418	3	543	6.63153	16.3343	4	543	2.92271	4.43523	3	543	5.28115	1.89873	3
		544	1.98558	9.03399	4													544	13.4125	8.62276	4	544	11.6357	4.23669	3					544	11.3916	4.62034	3	544	6.5146	16.3695	4	544	3.17401	3.93732	3	544	5.32838	1.66045	3
		545	2.12075	8.7436	4													545	13.2442	8.06481	4	545	11.7215	4.28944	3					545	11.7197	4.33016	3	545	6.63216	18.5603	4	545	3.3917	3.49889	3	545	5.48568	1.8154	3
		546	2.31616	8.70118	4													546	13.1532	8.06636	4	546	11.7415	4.40974	3					546	11.971	5.32303	3	546	7.5163	19.5994	4	546	3.37773	3.45937	3	546	5.50758	2.02742	3
		547	2.61353	8.80386	4													547	13.1277	8.21214	4	547	11.5352	4.69917	3					547	11.9528	5.61182	3	547	7.42224	19.8885	4	547	3.48373	3.26863	3	547	5.54171	2.11861	3
		548	2.58333	8.57767	4													548	13.1304	8.08869	4	548	11.8813	4.86082	3					548	11.9095	5.16648	3	548	6.75009	19.4402	4	548	3.71414	3.08752	3	548	5.57168	2.1843	3
		549	2.61646	10.2066	4													549	13.0794	7.97194	4	549	12.3086	4.97014	3					549	11.8405	5.50658	3	549	6.69954	18.8711	4	549	3.88269	2.96987	3	549	5.62059	1.90916	3
		550	2.53043	11.1426	4													550	13.0361	7.53306	4	550	12.1912	5.0603	3					550	11.6598	5.81292	3	550	7.36496	17.5543	4	550	4.01288	2.87084	3	550	5.57562	1.86818	3
		551	2.6181	10.6356	4													551	13.0061	7.49257	4	551	12.3719	5.15497	3					551	11.5866	5.99406	3	551	7.73135	18.1197	4	551	3.9708	3.12011	3	551	5.48611	2.0324	3
		552	2.82022	12.0027	4													552	12.9503	7.41805	4	552	12.9659	5.38077	3					552	11.5594	5.42434	3	552	8.30696	17.5518	4	552	4.14585	4.2148	3	552	5.26166	2.88199	3
		553	2.54099	12.325	4													553	12.8794	7.60055	4	553	12.561	5.54731	3					553	11.5162	5.22426	3	553	8.44958	18.2184	4	553	4.29238	4.33115	3	553	5.16913	2.06166	3
		554	2.40388	11.2102	4													554	12.8165	7.49791	4	554	12.8883	5.63391	3					554	11.4017	5.49725	3	554	8.20958	18.1938	4	554	4.43719	3.94384	3	554	5.28198	2.03393	3
		555	2.66219	10.5688	4													555	12.764	7.23525	4	555	12.7708	5.59076	3					555	11.3946	5.57714	3	555	8.52271	19.2074	4	555	4.50622	3.50002	3	555	5.39503	1.97523	3
		556	2.61772	10.7294	4													556	12.848	7.08151	4	556	13.0903	5.49605	3					556	11.4811	5.4785	3	556	8.88602	18.9203	4	556	4.72055	2.96969	3	556	5.29275	1.95813	3
		557	2.45573	9.3681	4													557	12.845	7.42491	4	557	13.1513	5.56265	3					557	11.6273	5.65267	3	557	9.759	17.9828	4	557	4.93776	2.9722	3	557	5.30197	1.89035	3
		558	2.31904	9.05544	4													558	12.7936	7.56362	4	558	13.6137	5.6128	3					558	11.5135	4.91051	3	558	10.5243	18.155	4	558	5.00361	4.53893	3	558	5.29307	2.11161	3
		559	2.39208	9.36766	4													559	12.788	7.84088	4	559	13.8363	5.53689	3					559	11.3201	5.30407	3	559	10.9661	17.9733	4	559	5.10184	4.51321	3	559	5.33192	2.30695	3
		560	2.55411	10.0085	4													560	12.8168	8.20223	4	560	13.8163	5.31476	3					560	10.9014	3.96144	3	560	10.9152	17.6357	4	560	5.20648	4.29394	3	560	5.3133	3.45218	3
		561	2.74318	10.5999	4													561	12.6907	7.99146	4	561	13.8369	5.55186	3					561	10.9303	3.1887	3	561	11.2188	17.2301	4	561	5.3889	4.55041	3	561	5.27039	3.22294	3
		562	2.71503	11.2119	4													562	12.6236	7.78292	4	562	13.9371	5.7084	3					562	11.1585	2.09502	3	562	11.3733	16.3173	4	562	5.58899	4.7937	3	562	5.25131	1.93116	3
		563	2.44846	8.6594	4													563	12.5898	7.98163	4	563	14.0775	5.74479	3					563	11.5175	3.60827	3	563	11.3722	16.0009	4	563	5.64409	4.67269	3	563	5.30684	1.89306	3
		564	2.54879	8.1387	4													564	12.5669	8.01941	4	564	14.0647	5.98099	3					564	11.5585	6.62473	3	564	11.3514	15.6472	4	564	5.59089	4.68143	3	564	5.31264	1.86948	3
		565	2.48484	8.82211	4													565	12.4479	8.23522	4	565	14.2101	6.00672	3					565	11.4262	7.29358	3	565	11.3311	14.0783	4	565	5.65777	4.71414	3	565	5.27222	1.62089	3
		566	2.56061	9.15871	4													566	12.4091	8.93808	4	566	14.1893	6.28429	3					566	11.1219	7.57804	3	566	11.3187	14.8415	4	566	5.60793	5.01585	3	566	5.2428	1.26506	3
		567	2.64195	10.1135	4													567	12.2773	9.41949	4	567	14.4954	6.55676	3					567	11.0912	7.13066	3	567	11.2267	16.2754	4	567	5.41555	5.87597	3	567	5.27559	1.0774	3
		568	2.58914	10.1388	4													568	12.078	9.16424	4	568	14.5254	6.84453	3					568	11.0363	6.69663	3	568	10.8842	15.0081	4	568	5.38168	6.16937	3	568	5.34674	1.18371	3
		569	2.70719	9.20173	4													569	11.9364	9.6216	4	569	14.1827	7.09158	3					569	10.9686	6.25623	3	569	10.7643	13.858	4	569	5.48553	6.1945	3	569	5.43422	1.66711	3
		570	2.96318	9.02235	4													570	12.0694	9.66423	4	570	14.0768	7.06406	3					570	10.7929	6.13627	3	570	10.494	13.0565	4	570	5.42886	5.68535	3	570	5.48302	1.70042	3
		571	3.04991	9.52025	4													571	12.0082	9.44157	4	571	14.3669	7.10549	3					571	10.8373	6.0871	3	571	10.1203	11.5401	4	571	5.34904	6.24514	3	571	5.54853	1.95882	3
		572	2.77526	9.13415	4													572	11.9347	9.63688	4	572	14.4303	7.65822	4					572	10.756	6.44012	3	572	9.48053	11.8206	4	572	5.40833	6.15136	3	572	5.53879	1.99284	3
		573	2.47977	10.7316	4													573	11.9435	9.45549	4	573	14.6214	7.84324	4					573	10.646	7.25605	3	573	8.71255	12.6462	4	573	5.33999	5.05589	3	573	5.58856	1.44776	3
		574	2.38883	10.2246	4													574	11.87	9.53288	4	574	14.4755	7.84915	4					574	10.2655	6.84737	3	574	8.97119	13.0552	4	574	5.42052	4.51137	3	574	5.39675	1.80124	3
		575	2.42146	10.2105	4													575	11.7712	9.44765	4	575	14.8361	7.70618	4					575	10.4512	6.71558	3	575	8.98495	14.3159	4	575	5.37829	4.1863	3	575	5.19971	1.44199	3
		576	2.36176	8.88219	4													576	11.7732	9.62995	4	576	14.9053	7.43825	4					576	10.822	6.41	3	576	9.65775	13.6838	4	576	5.26889	6.11988	3	576	4.976	1.2941	3
		577	2.41626	8.2957	4													577	11.8706	9.84455	4	577	14.9898	7.17506	4					577	10.8721	5.38319	3	577	9.85782	13.6532	4	577	5.10323	4.14749	3	577	4.85212	1.14401	3
		578	2.38307	7.65304	4													578	11.7966	9.92726	4	578	14.9502	6.90417	4					578	10.9889	5.95199	3	578	9.71347	14.1153	4	578	5.16126	3.8384	3	578	4.8356	1.28122	3
		579	2.24069	6.68307	4													579	11.8878	10.102	4	579	14.9935	6.89602	4					579	11.1409	6.50395	3	579	9.72128	14.7792	4	579	5.16891	4.01725	3	579	4.92524	1.59409	3
		580	2.29128	7.85882	4													580	11.8168	10.1558	4	580	14.9331	6.95543	4					580	11.1985	6.21481	3	580	9.65213	14.977	4	580	5.28432	3.82291	3	580	4.97254	1.83039	3
		581	2.0899	8.52066	4													581	11.7484	10.0877	4	581	14.8874	7.01297	4					581	11.2411	5.5418	3	581	9.75061	15.6979	4	581	5.22215	3.61988	3	581	5.10238	2.2203	3
		582	1.98347	8.12708	4													582	11.625	9.94936	4	582	14.7954	7.121	4					582	11.2986	5.52246	3	582	9.7155	16.413	4	582	5.20829	3.3887	3	582	5.27926	2.72259	3
		583	1.7194	7.63714	4													583	11.5206	10.0484	4	583	14.7912	7.22774	4					583	11.3242	6.01457	3	583	9.66959	15.6524	4	583	5.05762	3.58458	3	583	5.40969	3.46572	3
		584	1.85596	7.48653	4													584	11.4982	9.97019	4	584	14.6841	7.47933	4					584	11.3095	5.21202	3	584	9.63872	15.4841	4	584	5.2352	3.49709	3	584	5.56502	3.98986	3
		585	1.80347	6.56861	4													585	11.5843	10.505	4	585	14.95	7.6931	4					585	11.4683	5.31008	3	585	9.62585	16.2341	4	585	5.22044	3.44988	3	585	5.48063	3.66211	3
		586	1.76352	5.80574	4													586	11.4946	11.246	4	586	14.7851	7.86556	4					586	11.1375	5.66902	3	586	9.48367	16.2374	4	586	5.18663	3.13088	3	586	4.93755	4.46469	3
		587	1.7485	5.42369	4													587	11.4751	12.1745	4	587	14.5529	7.80234	4					587	11.1798	4.74461	3	587	9.20155	17.2143	4	587	5.01439	3.11701	3	587	4.91784	4.906	3
		588	1.75226	5.41941	4													588	11.561	11.9983	4	588	14.6364	7.73911	4					588	11.4262	4.4542	3	588	9.22945	18.3756	4	588	4.80736	3.37009	3	588	4.92849	4.51182	3
		589	1.95406	5.96269	4													589	11.5693	11.7322	4	589	14.4165	7.77105	4					589	11.4982	5.3165	3	589	9.08015	18.5142	4	589	4.97813	3.82794	3	589	4.82549	4.63334	3
		590	2.15854	5.06986	4													590	11.5346	11.8627	4	590	14.3769	7.84692	4					590	11.6365	5.19911	3	590	9.4574	19.052	4	590	5.01426	4.34809	3	590	4.80259	3.83556	3
		591	2.40825	4.90824	4													591	11.4584	11.1434	4	591	14.2139	7.74494	4					591	11.696	4.79623	3	591	9.62187	17.9009	4	591	5.08113	4.79129	3	591	4.69231	3.62449	3
		592	2.27442	6.8439	4													592	11.6745	9.98443	4	592	14.0754	7.58725	4					592	11.6157	4.44938	3	592	9.22113	17.2852	4	592	4.97316	4.06085	3	592	4.74888	3.09286	3
		593	2.48608	6.47994	4													593	11.6917	10.1489	4	593	14.2377	7.32325	4					593	11.2928	4.50165	3	593	9.27017	16.3617	4	593	4.97889	3.21012	3	593	4.62374	3.53523	3
		594	2.97629	8.48772	4													594	11.5545	11.0779	4	594	13.9154	6.99199	4					594	11.2935	4.59424	3	594	9.45824	16.8906	4	594	5.11109	3.1925	3	594	4.7506	3.28331	3
		595	2.91422	8.52561	4													595	11.2036	10.6726	4	595	13.8678	6.87487	4					595	11.3675	4.59408	3	595	9.53061	17.4374	4	595	4.91596	3.27765	3	595	5.10442	2.70251	3
		596	2.96147	7.03851	4													596	11.0894	10.7384	4	596	13.5916	6.77301	4					596	11.4558	4.32021	3	596	9.49727	15.7591	4	596	5.04442	3.29374	3	596	5.08606	2.96674	3
		597	2.78275	6.36635	4													597	11.0127	10.8459	4	597	13.6003	6.75946	4					597	11.182	4.27062	3	597	9.40625	15.6513	4	597	4.91483	3.97185	3	597	5.06979	2.61756	3
		598	2.57286	6.58369	4													598	10.9601	10.3602	4	598	13.5674	6.79497	4					598	10.9889	4.84219	3	598	9.66434	16.0574	4	598	4.9246	4.32182	3	598	5.51118	5.3638	3
		599	2.85244	7.40832	4													599	10.879	10.7006	4	599	13.2236	7.10086	4					599	10.9068	5.62996	3	599	9.82565	17.6063	4	599	4.96556	3.95134	3	599	5.25424	6.02962	3
		600	3.16249	7.6735	4													600	10.6748	11.0154	4	600	13.4595	7.12485	4					600	10.7548	6.92877	3	600	9.70837	18.8693	4	600	4.72537	3.79209	3	600	5.53884	6.05986	3
		601	3.20535	7.91389	4																	601	13.4517	6.68838	4					601	10.6262	6.55614	3	601	9.57562	20.7217	4	601	4.53783	4.36234	3	601	5.7338	5.43201	3
		602	3.21606	8.06503	4																	602	13.4409	6.37552	4					602	10.4398	6.59253	3	602	9.77351	20.3709	4	602	4.49866	4.49585	3	602	5.79814	4.89011	3
		603	3.19046	7.05325	4																	603	13.3268	6.28285	4					603	10.5109	6.15073	3	603	9.88831	21.7082	4	603	4.25558	4.43471	3	603	5.6962	4.34742	3
		604	3.06047	7.46861	4																	604	13.2576	6.01372	4					604	10.3699	6.23638	3	604	9.88799	19.9948	4	604	4.48811	4.89877	3	604	5.76278	3.80473	3
		605	3.22815	7.43195	4																	605	13.3643	6.24591	4					605	10.5304	6.09899	3	605	10.0113	18.5361	4	605	4.46571	5.36054	3	605	5.74829	3.26204	3
		606	3.27545	8.63957	4																	606	13.1893	6.41805	4					606	10.6431	6.19019	3	606	9.94818	17.6681	4	606	4.43464	5.25472	3	606	5.82906	2.79431	3
		607	3.52134	8.20816	4																	607	12.8701	6.78267	4					607	10.5614	6.43897	3	607	9.87158	18.8352	4	607	4.46851	5.24508	3	607	5.9824	2.49364	3
		608	3.30423	7.67492	4																	608	13.295	7.20669	4					608	10.939	5.46255	3	608	10.0318	18.3033	4	608	4.55528	5.74728	3	608	6.04629	2.05124	3
		609	3.26068	7.9617	4																	609	13.1639	7.41012	4					609	10.8883	5.10696	3	609	10.0766	17.5768	4	609	4.61923	6.84822	3	609	6.04822	2.10632	3
		610	2.88998	7.51061	4																	610	13.1723	7.50557	4					610	10.6972	4.88588	3	610	10.0392	17.2613	4	610	4.70542	6.34944	3	610	6.03798	2.22556	3
		611	2.90311	7.75331	4																	611	13.205	7.59133	4					611	10.4074	5.12825	3	611	10.0962	15.7376	4	611	4.80358	6.38027	3	611	6.077	2.09441	3
		612	2.99465	8.02881	4																	612	13.8113	7.53544	4					612	10.1574	5.29838	3	612	10.2348	15.1436	4	612	4.77049	6.48616	3	612	6.03635	2.61892	3
		613	3.12717	8.38167	4																	613	13.8158	7.21168	4					613	10.0127	4.54984	3	613	10.3681	15.6907	4	613	4.69592	6.55679	3	613	6.02591	2.45284	3
		614	3.27351	10.2786	4																	614	13.1022	6.72243	4					614	9.94525	4.26124	3	614	10.3506	16.1842	4	614	4.59098	6.80172	3	614	6.03032	2.60641	3
		615	3.05427	9.9924	4																	615	13.2245	6.13173	4					615	10.0266	4.49452	3	615	10.5548	16.3416	4	615	4.74163	6.89027	3	615	6.10511	2.56319	3
		616	3.00419	10.3898	4																	616	13.186	5.75517	4					616	10.1544	4.77497	3	616	10.3109	16.942	4	616	4.69035	7.05399	3	616	5.99266	2.87364	3
		617	3.17842	9.92212	4																	617	13.3681	6.35923	4					617	10.3453	4.69348	3	617	10.3825	16.3121	4	617	4.6729	6.91934	3	617	6.00843	3.20299	3
		618	3.05679	10.2319	4																	618	13.4596	7.20887	4					618	10.5758	4.40697	3	618	10.87	14.9656	4	618	4.66028	7.63312	3	618	5.93101	2.5983	3
		619	2.92033	10.7252	4																	619	13.0773	7.41376	4					619	10.5977	4.48696	3	619	11.0701	14.2707	4	619	4.73616	6.38867	3	619	5.88885	2.4786	3
		620	3.09467	8.72425	4																	620	12.9534	7.6338	4					620	10.9434	4.47648	3	620	11.2599	13.3338	4	620	4.99971	6.95855	3	620	5.94196	1.97948	3
		621	3.03956	8.1662	4																	621	13.3576	8.21919	4					621	11.3633	3.696	3	621	11.2458	13.0737	4	621	5.12123	6.68269	3	621	6.00827	2.41074	3
		622	3.03402	8.32848	4																	622	13.3509	8.57449	4					622	12.0656	4.31063	3	622	11.3608	13.5353	4	622	5.11319	6.72096	3	622	6.5486	2.17124	3
		623	2.98347	8.35872	4																	623	13.4743	8.91603	4					623	12.7491	5.07287	3	623	11.9655	15.4591	4	623	5.15067	6.37643	3	623	6.56855	1.81165	3
		624	2.99174	8.11473	4																	624	13.5189	9.25629	4					624	13.1545	5.76282	3	624	11.8808	15.4286	4	624	5.33238	6.50928	3	624	6.53858	2.28109	3
		625	2.84046	7.57147	4																	625	13.2241	9.4305	4					625	13.7514	5.7513	3	625	10.3795	15.4316	4	625	5.50219	5.03235	3	625	6.55959	2.54369	3
		626	2.88293	8.07478	4																	626	13.0253	9.48301	4					626	14.1385	5.26635	3	626	7.43881	15.986	4	626	5.49286	4.98207	3	626	6.54969	2.44928	3
		627	2.77995	7.6546	4																	627	13.385	9.53466	4					627	14.7451	5.9467	3	627	7.27145	16.8504	4	627	5.29152	5.311	3	627	6.60307	4.02819	3
		628	2.5993	8.0009	4																	628	13.466	9.57064	4					628	15.2479	6.06044	3	628	7.17404	16.7542	4	628	5.49508	5.36441	3	628	6.57984	5.41956	3
		629	2.41276	8.49571	4																	629	13.4965	9.53791	4					629	15.1105	7.14791	3	629	7.1871	17.1285	4	629	5.60742	5.75314	3	629	6.6377	5.12075	3
		630	2.15491	7.76532	4																	630	13.6817	9.24072	4					630	15.1118	7.23164	3	630	7.85252	17.8537	4	630	5.32506	5.78274	3	630	6.45539	2.96731	3
		631	2.22508	7.92938	4																	631	13.6102	8.81894	4					631	14.8302	6.50569	3	631	8.33607	16.9342	4	631	5.10014	5.32541	3	631	5.88218	1.88675	3
		632	2.228	8.28166	4																	632	13.3851	8.42567	4					632	14.0884	5.28458	3	632	8.62326	16.0819	4	632	5.1993	4.72256	3	632	5.70077	1.97046	3
		633	2.27851	8.41208	4																	633	13.7537	8.08711	4					633	13.9348	4.49439	3	633	9.30617	16.0283	4	633	5.38149	4.15338	3	633	5.70549	2.43715	3
		634	2.11626	8.6821	4																	634	13.862	8.31374	4					634	13.8904	3.62454	3	634	9.61142	15.9942	4	634	4.9623	3.60881	3	634	5.6514	1.76491	3
		635	1.97081	8.1542	4																	635	13.5645	8.20272	4					635	14.0483	3.76804	3	635	9.97676	17.7167	4	635	4.94128	3.42233	3	635	5.60718	1.82966	3
		636	1.83564	8.6587	4																	636	13.6933	8.25761	4					636	14.0696	3.78939	3	636	9.14749	20.0972	4	636	5.37934	3.95134	3	636	5.58866	2.38152	3
		637	1.52637	9.0645	4																	637	13.9403	8.42271	4					637	14.1401	3.80717	3	637	8.97517	18.0031	4	637	5.34116	4.5874	3	637	5.48669	2.82478	3
		638	1.74106	8.79663	4																	638	13.3148	8.55529	4					638	14.3	3.5941	3	638	9.37749	18.2813	4	638	5.42776	4.89134	3	638	5.79836	1.80054	3
		639	1.48541	8.64289	4																	639	13.3083	8.39841	4					639	14.4936	3.38569	3	639	9.74051	19.1367	4	639	5.48282	6.02674	3	639	5.83955	1.07953	3
		640	1.22795	8.4198	4																	640	13.4422	8.37816	4					640	14.5217	3.91238	3	640	10.2082	21.6689	4	640	5.20619	7.03823	3	640	6.05448	1.36054	3
		641	0.935913	7.79005	4																	641	13.9615	8.33494	4					641	14.5158	4.52349	3	641	10.5836	22.4673	4	641	5.13451	7.41954	3	641	6.2853	1.22632	3
		642	0.832367	7.68651	4																	642	13.6906	8.18631	4					642	14.6641	4.55842	3	642	10.8679	23.1074	4	642	5.0656	6.52035	3	642	6.46757	1.85773	3
		643	0.813339	6.81015	4																	643	13.5333	7.75153	4					643	14.6316	5.16831	3	643	10.5081	23.8326	4	643	5.13532	5.56244	3	643	6.50816	1.78949	3
		644	0.501999	6.65494	4																	644	13.5745	7.55656	4					644	14.4582	5.94966	3	644	10.1055	21.5504	4	644	5.09437	4.60383	3	644	6.24188	2.30496	3
		645	0.40667	7.4912	4																	645	13.4984	7.79108	3					645	14.2896	5.9259	3	645	8.15771	20.5696	4	645	5.25315	4.50263	3	645	6.28693	1.73374	3
		646	0.416428	6.20205	4																	646	13.6357	8.10693	3					646	14.2235	5.59064	3	646	6.16287	21.8995	4	646	5.2284	4.51617	3	646	6.25684	3.48423	3
		647	0.274025	6.48981	4																	647	13.4868	7.96344	3					647	14.3336	6.2767	3	647	6.1433	22.2792	4	647	5.17478	4.71815	3	647	6.30231	4.43459	3
		648	0.36219	6.19379	4																	648	13.6745	7.73824	3					648	14.3309	5.37558	3	648	5.53548	23.9943	4	648	5.20191	5.33408	3	648	6.38431	4.0054	3
		649	0.27269	6.44015	4																	649	13.9093	7.50352	3					649	14.1875	5.1267	3	649	6.37901	24.7167	4	649	5.34616	5.31451	3	649	6.4902	3.9443	3
		650	0.225258	7.71738	4																	650	13.314	7.07219	3					650	14.3031	4.31644	3	650	5.65843	26.5669	4	650	5.37566	4.93006	3	650	6.57024	3.09045	3
		651	0.124832	6.19084	4																	651	13.3535	6.69718	3					651	14.3687	3.40926	3	651	6.00018	28.0123	4	651	5.30935	4.69775	3	651	6.53629	2.07783	3
		652	0.250557	5.96107	4																	652	13.345	6.5647	3					652	14.3579	3.63017	3	652	6.10074	29.7056	4	652	5.22082	4.63258	3	652	6.70217	1.62472	3
		653	0.234848	5.32384	4																	653	13.4687	6.39349	3					653	14.2783	4.6184	3	653	7.29668	29.129	4	653	5.25545	4.44748	3	653	6.77165	1.35141	3
		654	0.293587	6.51124	4																	654	13.4742	6.16417	3					654	14.2045	4.9613	3	654	8.33492	28.8285	4	654	5.15331	4.67979	3	654	7.06459	0.64663	3
		655	0.411613	7.64143	4																	655	13.4109	6.17934	3					655	14.2525	4.77408	3	655	9.23846	28.3681	4	655	5.12386	4.6911	3	655	7.28958	1.48211	3
		656	0.339561	8.44545	4																	656	13.3148	6.20328	3					656	14.2199	6.24389	3	656	9.50473	27.1159	4	656	5.06048	4.5569	3	656	7.41789	2.37166	3
		657	0.464157	7.58918	4																	657	13.7541	6.275	3					657	14.1949	5.49751	3	657	9.39388	26.9645	4	657	5.14382	4.43784	3	657	7.45497	2.17219	3
		658	0.350914	6.60009	4																	658	13.2682	6.36547	3					658	14.1963	5.55321	3	658	9.56886	27.7396	4	658	5.02159	3.94258	3	658	7.41642	1.89531	3
		659	0.430656	5.59828	4																	659	13.1281	6.35622	3					659	14.1457	5.3974	3	659	9.17479	27.1861	4	659	4.9422	4.19649	3	659	7.51515	1.19177	3
		660	0.231995	5.76636	4																	660	13.5679	6.31963	3					660	14.292	4.5814	3	660	9.61108	26.1055	4	660	4.86028	4.96875	3	660	7.52832	1.64445	3
		661	0.294518	6.36185	4																	661	13.5339	6.30454	3					661	14.4155	4.56437	3	661	12.6754	25.2338	4	661	4.8457	5.96626	3	661	7.56004	1.36429	3
		662	0.36071	7.33743	4																	662	13.4428	6.29267	3					662	14.2126	3.6131	3	662	13.2018	25.2502	4	662	4.82332	6.15327	4	662	7.55214	1.02389	3
		663	0.510185	6.68601	4																	663	13.202	6.27184	3					663	14.0261	3.55079	3	663	12.873	27.3423	4	663	4.80377	7.55709	4	663	7.56031	1.06462	3
		664	0.512314	8.36829	4																	664	13.1945	6.25017	3					664	13.9349	4.23657	3	664	12.6632	28.0301	4	664	4.68794	6.53953	4	664	7.63987	0.99724	3
		665	0.411407	7.23388	4																	665	13.2963	6.30816	3					665	13.9799	3.55644	3	665	12.3156	29.4883	4	665	4.70973	6.62314	4	665	7.56726	2.32783	3
		666	0.600372	5.88816	4																	666	12.9657	6.1266	3					666	13.9091	3.42254	3	666	12.1182	29.702	4	666	4.78694	7.22134	4	666	7.15505	2.79819	3
		667	0.634972	5.52194	4																	667	12.8138	5.91843	3					667	13.7871	3.25588	3	667	11.9709	30.1501	4	667	4.87277	7.34516	4	667	7.09705	2.42927	3
		668	0.867302	5.12182	4																	668	13.018	6.15965	3					668	13.8478	2.87234	3	668	11.8496	30.7989	4	668	4.87262	8.10014	4	668	7.16418	1.64694	3
		669	0.834549	5.96476	4																	669	12.7271	6.36123	3					669	13.7636	3.57249	3	669	11.7132	30.9297	4	669	4.89429	6.6373	4	669	7.15663	1.7433	3
		670	0.526031	7.19239	4																	670	12.5728	6.18159	3					670	13.8105	3.9855	3	670	11.6309	31.0739	4	670	4.96971	6.0444	4	670	7.29098	2.48969	3
		671	1.29345	6.67185	4																	671	12.7251	6.27204	3					671	14.1493	4.38739	3	671	11.5214	30.2328	4	671	5.32221	4.95583	4	671	7.17726	1.70492	3
		672	1.34763	6.4611	4																	672	12.5046	6.15671	3					672	14.0657	4.72336	3	672	11.4124	32.0594	4	672	5.1449	4.29487	4	672	7.1447	3.15037	3
		673	1.35925	5.93267	4																	673	12.6551	5.98004	3					673	14.018	5.56497	3	673	11.1811	31.815	4	673	5.1951	4.69466	4	673	7.11156	3.23104	3
		674	1.57751	6.01226	4																	674	12.392	6.32752	3					674	14.1943	5.02542	3	674	11.1971	31.203	4	674	5.09105	4.41583	4	674	7.66873	3.94485	3
		675	1.60776	6.52698	4																	675	12.2907	6.31429	3					675	14.2411	5.09502	3	675	10.9296	30.5175	4	675	5.07998	4.1768	4	675	8.05464	4.02629	3
		676	1.68674	5.62294	4																	676	12.68	6.10849	3					676	14.3219	6.24766	3	676	10.9082	29.4261	4	676	5.14774	3.35068	4	676	7.87113	1.37247	3
		677	1.83155	4.28965	4																	677	12.6736	6.05397	3					677	14.384	7.82552	3	677	11.0387	29.2623	4	677	5.17945	3.59248	4	677	7.90431	0.651061	3
		678	1.81211	4.64312	4																	678	13.1811	5.95885	3					678	14.5516	9.17336	3	678	11.1698	28.9898	4	678	5.39074	4.00212	4	678	7.84694	1.56771	3
		679	1.81897	5.01726	4																	679	12.924	5.54669	3					679	14.6219	6.48796	3	679	11.3149	28.6542	4	679	5.39111	4.25312	4	679	7.80759	1.73646	3
		680	1.63432	5.18005	4																	680	13.3507	5.28805	3					680	14.734	5.44784	3	680	11.1898	29.4378	4	680	5.40841	4.07845	4	680	7.87472	0	1
		681	1.50615	5.15863	4																	681	13.0169	5.27056	3					681	14.7984	5.75733	3	681	11.0989	27.964	4	681	5.64008	5.57908	4	681	7.93813	0	1
		682	1.47158	6.038	4																	682	13.0499	5.26101	3					682	14.8601	6.82699	3	682	11.1986	25.9935	4	682	5.58943	4.68937	4	682	7.87339	0	1
		683	1.41207	6.20227	4																	683	12.8517	5.33248	3					683	14.9508	6.81037	3	683	11.1231	26.3231	4	683	5.65885	5.97519	4	683	7.84228	0	1
		684	1.44141	6.07276	4																	684	13.0297	5.33187	3					684	14.9295	5.91372	3	684	11.1625	26.1532	4	684	5.95916	5.50825	4	684	7.94996	0	1
		685	1.3866	6.21148	4																	685	13.5396	5.07817	3					685	15.492	7.11954	3	685	10.9026	27.0664	4	685	6.26834	5.30686	4	685	8.11373	0	1
		686	1.34585	6.79482	4																	686	13.041	5.03564	3					686	14.6989	7.48043	3	686	10.9533	25.3008	4	686	6.18509	5.60366	4	686	8.46819	0	1
		687	1.57061	6.44764	4																	687	13.3294	5.18286	3					687	14.6683	7.27312	3	687	11.0954	24.453	4	687	6.09235	5.49782	4	687	8.56536	0.481691	3
		688	1.72044	6.51148	4																	688	13.2207	5.22278	3					688	14.037	7.64116	3	688	11.1938	25.9527	4	688	6.10931	4.92054	4	688	8.50881	0.860477	3
		689	1.58108	6.0221	4																	689	13.4633	5.17003	3					689	13.2984	7.15972	3	689	11.2446	25.7027	4	689	6.21964	4.63116	4	689	8.53731	0.431179	3
		690	1.3512	6.19734	4																	690	13.131	5.45597	3					690	13.0143	7.48134	3	690	11.3392	26.0263	4	690	6.38987	3.91296	4	690	8.60037	2.37501	3
		691	1.21413	6.38937	4																	691	13.0242	5.51018	3					691	12.5258	8.02277	3	691	11.5904	25.8423	4	691	6.4453	3.13142	4	691	8.64144	2.30986	3
		692	1.46671	5.80299	4																	692	13.0072	5.46255	3					692	12.5059	7.21149	3	692	11.7655	23.988	4	692	6.40762	2.29435	4	692	8.63334	2.31229	3
		693	1.28954	5.73322	4																	693	13.2327	5.88182	3					693	12.298	7.28068	3	693	11.8076	21.2365	4	693	6.63641	0.942383	4	693	8.63777	1.65467	3
		694	1.27722	5.82327	4																	694	13.5155	5.79779	3					694	12.3681	7.50184	3	694	11.852	19.7828	4	694	6.71401	0.0123857	4	694	8.62609	2.3946	3
		695	1.59756	6.27289	4																	695	13.3862	6.12902	3					695	12.4912	6.75761	3	695	11.9285	19.8437	4	695	6.65965	0.37892	4	695	8.62764	2.35386	3
		696	1.64855	6.45674	4																	696	13.4105	5.95072	3					696	12.5027	5.80052	3	696	12.0352	18.4165	4	696	6.78673	1.87865	4	696	8.61852	2.07242	3
		697	2.12325	6.51558	4																	697	13.1104	6.19465	3					697	12.4418	6.13309	3	697	11.8501	18.7152	4	697	6.92932	1.99081	4	697	8.49383	1.73746	3
		698	2.2396	6.31188	4																	698	12.6625	6.31884	3					698	12.2377	5.88037	3	698	11.4174	19.5123	4	698	6.83391	1.72562	4	698	8.49334	2.38978	3
		699	2.18275	6.93408	4																	699	13.086	6.2843	3					699	12.0724	5.97097	3	699	11.2749	18.5258	4	699	6.71025	1.80155	4	699	8.38332	2.57667	3
		700	2.33485	7.31126	4																	700	13.1762	6.09832	3					700	12.1455	7.07049	3	700	12.6638	18.454	4	700	6.6822	1.3471	4	700	8.31148	1.96152	3
		701	2.31818	7.8345	4																	701	12.9785	5.7749	3					701	12.3156	6.74447	3	701	13.4567	19.1532	4	701	6.69154	3.93972	4	701	8.14438	2.0065	3
		702	2.56295	8.3136	4																	702	12.6635	5.36728	3					702	12.2861	6.7874	3	702	13.8299	20.5677	4	702	6.64616	6.39822	4	702	8.00389	2.10543	3
		703	2.76613	8.98188	4																	703	12.9711	4.15063	3					703	12.5647	5.95318	3	703	14.1025	20.8447	4	703	6.59212	6.36654	4	703	7.79182	1.79865	3
		704	2.85049	9.63273	4																	704	12.9596	1.27463	3					704	12.105	6.18004	3	704	14.2214	19.7401	4	704	7.01919	6.79291	4	704	7.69977	1.87802	3
		705	2.7714	10.2352	4																									705	12.0203	6.58643	3	705	14.4899	20.2826	4	705	7.1785	7.24131	4	705	7.6293	2.46454	3
		706	2.67332	10.1516	4																									706	11.8054	6.46333	3	706	14.985	20.2406	4	706	7.44824	8.12547	4	706	7.50701	1.89251	3
		707	2.49619	10.5384	4																									707	11.91	5.79405	3	707	15.2981	20.333	4	707	7.5101	7.62325	4	707	7.41329	1.85918	3
		708	2.6318	10.5685	4																									708	11.9349	7.32102	3	708	15.3453	20.9589	4	708	7.43565	7.39786	4	708	7.11203	1.10392	3
		709	2.80516	10.7643	4																									709	12.0004	6.44771	3	709	15.4691	19.9649	4	709	7.22468	7.91191	4	709	6.73764	1.45943	3
		710	2.84116	10.8861	4																									710	11.4918	6.60274	3	710	13.6283	19.1447	4	710	7.19257	9.14366	4	710	6.52173	1.12481	3
		711	2.65955	10.6644	4																									711	11.0289	5.74366	3	711	11.7751	18.1542	4	711	7.27754	9.25676	4	711	6.3493	0.862136	3
		712	2.74925	10.1567	4																									712	10.719	5.99803	3	712	13.4531	19.4733	4	712	7.35672	8.2979	4	712	6.35486	1.29982	3
		713	2.66658	9.80823	4																									713	10.5204	4.97107	3	713	15.445	20.9324	4	713	7.19345	8.63088	4	713	6.34288	2.68571	3
		714	2.67487	9.81063	4																									714	10.0483	4.62522	3	714	16.2984	21.7378	4	714	7.13601	9.2256	4	714	6.3476	2.86125	3
		715	2.77949	9.81487	4																									715	9.6442	4.99629	3	715	16.158	21.3691	4	715	7.03301	9.18428	4	715	6.4567	4.35229	3
		716	3.06108	9.96171	4																									716	9.37393	4.90892	3	716	13.9036	22.5284	4	716	7.17702	8.50343	4	716	6.80645	4.67887	3
		717	2.74188	9.9244	4																									717	9.08371	4.60334	3	717	11.63	22.788	4	717	7.26712	9.49755	4	717	6.88185	6.18309	3
		718	2.90688	9.96153	4																									718	8.71619	4.91966	3	718	14.4091	23.5718	4	718	7.09385	9.46813	4	718	6.78201	6.82098	3
		719	2.90504	10.4507	4																									719	8.41721	5.29319	3	719	16.6458	22.4201	4	719	7.15812	8.76097	4	719	6.79169	5.5207	3
		720	3.03082	10.3942	4																									720	8.35513	5.04838	3	720	16.8745	20.438	4	720	7.04384	7.49727	4	720	6.74038	2.27123	3
		721	3.28529	9.74917	4																									721	8.15442	4.71336	3	721	17.1422	21.6554	4	721	7.28553	6.78833	4	721	6.86503	2.16448	3
		722	3.36675	8.98679	4																									722	8.01944	5.59495	3	722	17.8458	20.7072	4	722	7.25477	7.14366	4	722	6.9907	3.07889	3
		723	3.41722	8.24792	4																									723	7.85864	5.89535	3	723	17.4488	21.2548	4	723	7.25813	7.60741	4	723	6.93269	3.53993	3
		724	3.26934	7.80104	4																									724	7.63272	6.6908	3	724	17.8935	22.8522	4	724	7.27225	6.77426	4	724	6.84233	3.24297	3
		725	3.41136	8.03377	4																									725	7.5159	7.28608	3	725	18.0387	22.8723	4	725	7.00997	6.46199	4	725	6.91096	2.52626	3
		726	3.41063	8.09056	4																									726	7.62646	7.07278	3	726	17.1101	23.5432	4	726	6.94278	6.57984	4	726	6.84698	2.82433	3
		727	3.45361	7.6441	4																									727	7.61908	5.6928	3	727	15.3494	22.4842	4	727	6.76881	4.67067	4	727	6.64192	2.74608	3
		728	3.24854	7.33717	4																									728	7.65717	5.96922	3	728	14.3385	22.2492	4	728	6.99109	6.72939	4	728	6.63792	2.68491	3
		729	2.86771	7.4945	4																									729	7.94971	5.34405	3	729	14.6908	23.1043	4	729	6.98785	7.74525	4	729	6.72288	1.62468	3
		730	2.69538	7.7248	4																									730	7.65463	4.85036	3	730	14.906	23.1771	4	730	6.9118	8.27932	4	730	6.81854	1.03258	3
		731	2.85903	7.92646	4																									731	7.63718	3.99504	3	731	15.3535	24.8529	4	731	6.96509	6.71714	4	731	6.75804	1.31834	3
		732	2.87571	8.24008	4																									732	7.68454	3.97942	3	732	16.0274	28.7396	4	732	7.02751	6.47067	4	732	6.67254	1.03411	3
		733	2.87635	7.34764	4																									733	7.76566	4.38007	3	733	15.6972	29.2835	4	733	7.08894	6.56586	4	733	6.66527	1.35113	3
		734	2.60637	6.98872	4																									734	7.73535	3.76268	3	734	14.0902	30.231	4	734	7.11181	6.13033	4	734	6.79558	0.156126	3
		735	2.46961	7.00189	4																									735	8.39081	3.41441	3	735	13.7486	31.794	4	735	7.14384	5.55898	4	735	6.79809	0	1
		736	2.59264	6.73972	4																									736	8.46378	3.93593	3	736	13.0526	29.8828	4	736	7.10605	6.53725	4	736	6.8627	0	1
		737	2.59003	6.36993	4																									737	8.72809	3.74186	3	737	13.3584	29.0247	4	737	7.35148	7.22518	4	737	7.0459	0	1
		738	2.49993	6.6742	4																									738	8.67017	3.51417	3	738	12.5277	28.8116	4	738	7.15715	5.33536	4	738	7.29967	0	1
		739	2.52716	6.48694	4																									739	8.77481	3.85204	3	739	12.9615	29.1243	4	739	7.41117	5.57482	4	739	7.48345	0	1
		740	2.44663	5.94786	4																									740	9.13644	4.07482	3	740	13.9708	28.773	4	740	7.21358	5.02218	4	740	7.62519	0	1
		741	2.58743	5.7683	4																									741	9.18973	3.98909	3	741	15.2013	28.8449	4	741	7.47152	5.29484	4	741	7.63081	0	1
		742	2.56411	6.52579	4																									742	9.20609	3.64044	3	742	15.3502	28.8486	4	742	7.45795	5.28092	4	742	7.46165	0	1
		743	2.52265	6.74448	4																									743	9.17947	4.3037	3	743	15.1393	31.1235	4	743	7.29799	7.31282	4	743	7.49423	0	1
		744	2.61165	6.70887	4																									744	9.21243	4.37758	3	744	15.036	32.4098	4	744	7.28037	7.84578	4	744	7.68016	0	1
		745	2.46456	6.3699	4																									745	9.18152	4.22625	3	745	15.1818	33.4808	4	745	7.57635	7.22041	4	745	7.81858	0	1
		746	2.4503	6.15827	4																									746	9.15738	4.37426	3	746	15.4031	33.1122	4	746	7.4257	6.27365	4	746	7.75959	0.932552	3
		747	2.48746	5.71352	4																									747	9.07596	4.02408	3	747	15.3699	34.4932	4	747	7.22682	6.03052	4	747	7.7959	1.32814	3
		748	2.43855	5.64784	4																									748	9.03506	4.22766	3	748	15.3672	35.9105	4	748	7.18966	4.25343	3	748	7.81431	1.36349	3
		749	2.45146	5.91616	4																									749	9.00516	6.56012	3	749	16.1547	36.0541	4	749	7.14498	2.93206	3	749	7.67099	1.74191	3
		750	2.17601	5.82196	4																									750	8.95184	8.40502	3	750	15.8937	35.3108	4	750	7.1601	3.3474	3	750	7.6342	1.93803	3
		751	2.18153	5.79866	4																									751	8.90393	8.36335	3	751	16.9073	32.9147	4	751	7.36413	3.81796	3	751	7.6472	2.2596	3
		752	2.03733	5.76468	4																									752	8.89667	8.09931	3	752	17.9882	27.1543	4	752	7.23835	3.67217	3	752	7.7408	2.2216	3
		753	1.82178	5.52611	4																									753	8.90024	7.73653	3	753	17.5527	25.9263	4	753	7.15949	3.98534	3	753	7.72797	2.32071	3
		754	1.74782	5.37566	4																									754	9.02725	7.28232	3	754	16.4543	26.8056	4	754	7.22092	5.14334	3	754	7.76979	2.5737	3
		755	1.7155	5.43511	4																									755	9.29016	6.57602	3	755	15.6768	27.2995	4	755	6.99271	6.12266	3	755	7.8073	2.65597	3
		756	1.57385	5.66363	4																									756	9.58551	6.67533	3	756	15.6832	27.0272	4	756	6.80278	6.27913	3	756	7.83987	1.60693	3
		757	1.80143	4.45163	4																									757	9.84296	7.00294	3	757	15.9918	25.6829	4	757	6.92263	6.35708	3	757	7.96279	1.33071	3
		758	1.67896	5.86483	4																									758	9.9986	6.85	3	758	16.3493	25.2445	4	758	6.94751	5.9265	3	758	8.34908	1.11692	3
		759	1.43776	5.5154	4																									759	10.2545	7.29668	3	759	17.9533	25.0995	4	759	6.91303	4.71236	3	759	8.39464	1.58184	3
		760	1.51686	5.19049	4																									760	10.2229	6.51497	3	760	18.4614	23.8805	4	760	7.16722	4.75497	3	760	8.28327	1.07723	3
		761	1.56639	4.68007	4																									761	10.4583	5.78116	3	761	18.2116	26.1773	4	761	7.27635	3.81017	3	761	8.40987	1.19183	3
		762	1.68619	4.52414	4																									762	10.3635	5.48532	3	762	18.3621	27.9117	4	762	7.14535	4.39696	3	762	8.12916	1.13459	3
		763	1.60607	3.92775	4																									763	10.1052	5.15122	3	763	19.019	26.3433	4	763	7.01719	4.22806	3	763	7.78732	1.46862	3
		764	1.24586	2.77697	4																									764	9.85611	4.25226	3	764	19.2362	26.7389	4	764	7.06814	4.67845	3	764	7.63961	2.81323	3
		765	1.37154	2.3257	4																									765	9.6582	3.97868	3	765	19.455	27.5749	4	765	6.97332	5.24796	3	765	7.39263	2.27703	3
		766	1.50829	2.06242	4																									766	9.47302	3.75004	3	766	19.4537	27.9109	4	766	6.96157	3.50942	3	766	7.30067	1.96916	3
		767	1.33404	2.43367	4																									767	9.465	4.45935	4	767	19.8262	28.8866	4	767	6.92387	5.0788	3	767	7.14342	2.11378	3
		768	1.57198	2.198	4																									768	9.38776	4.74147	4	768	20.0536	27.8656	4	768	6.91598	5.55906	3	768	6.96973	2.11386	3
		769	1.40736	1.89011	4																									769	9.27652	4.51783	4	769	19.5335	26.0845	4	769	7.05934	3.70299	3	769	6.99341	1.36132	3
		770	1.53628	1.90766	4																									770	9.10519	5.27895	4	770	19.1744	27.4745	4	770	7.00221	3.69121	3	770	7.05163	1.01835	3
		771	1.49783	1.80016	4																									771	8.95529	8.15324	4	771	19.2687	27.7699	4	771	6.78501	3.78662	3	771	7.03004	0.994451	3
		772	1.61274	1.62577	4																									772	8.89783	8.66216	4	772	19.773	27.7716	4	772	6.71887	4.26137	3	772	6.76195	0.358856	3
		773	1.53107	2.7465	4																									773	8.87085	7.87162	4	773	20.1812	25.5199	4	773	6.66297	5.05351	3	773	6.56294	0	1
		774	1.51677	3.28607	4																									774	8.9079	8.34733	4	774	20.2944	25.7738	4	774	6.672	5.29289	3	774	6.39655	0	1
		775	1.49812	3.29091	4																									775	8.81198	7.92647	4	775	20.2157	26.4914	4	775	6.63984	0.105649	3	775	6.35559	0	1
		776	1.5062	3.00833	4																									776	8.77054	7.04679	4	776	20.2698	25.7608	4	776	6.21634	0	1	776	6.30398	0	1
		777	1.49206	3.2254	4																									777	8.92587	6.83564	4	777	20.3045	25.5249	4	777	6.21837	0	1	777	6.31327	0	1
		778	1.56712	3.63426	4																									778	8.72751	6.85287	4	778	20.309	27.8778	4	778	5.97079	0	1	778	6.39262	0	1
		779	1.55228	3.58739	4																									779	8.67386	6.66782	4	779	20.3752	27.9864	4	779	5.91678	0	1	779	6.37142	0	1
		780	1.38931	3.78859	4																									780	8.66376	6.53391	4	780	20.2126	29.0474	4	780	5.824	0	1	780	6.34145	0	1
		781	1.33633	4.24024	4																									781	8.6076	6.47272	4	781	19.8435	29.1012	4	781	5.8694	0.0275798	3	781	6.21085	0	1
		782	1.57251	4.0443	4																									782	8.56082	6.89829	4	782	19.3234	29.7136	4	782	5.67743	0.613397	3	782	5.97027	0	1
		783	1.81452	4.07935	4																									783	8.56607	7.32804	4	783	18.9573	27.8946	4	783	5.42723	0.620075	3	783	5.43449	0	1
		784	1.83566	4.71997	4																									784	8.51831	7.20526	4	784	18.8456	29.7884	4	784	5.39011	0.164745	3	784	5.56151	0	1
		785	2.01345	4.16282	4																									785	8.45816	7.37897	4	785	19.3613	30.4507	4	785	5.46612	0.141894	3	785	5.11745	0	1
		786	2.3702	2.19133	4																									786	8.50714	7.26821	4	786	19.5272	31.2871	4	786	5.46793	0.67382	3	786	5.08966	0	1
		787	2.44378	2.66342	4																									787	8.55191	6.01028	4	787	19.376	31.7581	4	787	5.6988	0.228787	3	787	4.99843	0	1
		788	2.68231	3.13131	4																									788	8.4259	4.66164	4	788	19.2887	31.2571	4	788	5.69641	0.566819	3	788	4.99058	0	1
		789	2.65211	3.79284	4																									789	8.40988	4.23756	4	789	19.2315	30.6885	4	789	5.6932	0.597854	3	789	4.82579	0	1
		790	3.02622	5.49333	4																									790	8.45676	3.71351	4	790	19.2527	31.4373	4	790	5.5117	0.0353554	3	790	4.94505	0	1
		791	3.08334	5.39435	4																									791	8.41068	3.75602	4	791	19.3121	31.7608	4	791	5.45808	0	1	791	5.35099	0	1
		792	3.23373	5.37013	4																									792	8.49976	3.44134	4	792	19.3463	32.3771	4	792	5.46271	0	1	792	5.55881	0	1
		793	3.89475	4.32759	4																									793	8.54944	3.56288	4	793	19.2761	32.3148	4	793	5.41121	0.0110179	3	793	5.95529	0	1
		794	4.04848	4.9405	4																									794	8.51712	4.25663	4	794	19.2096	32.0609	4	794	5.33045	0	1	794	6.18457	0	1
		795	4.14994	4.99272	4																									795	8.50845	4.10157	4	795	19.1729	32.6665	4	795	5.13144	0	1	795	6.03818	0	1
		796	4.19259	4.51107	4																									796	8.45511	3.9158	4	796	19.188	32.7391	4	796	5.15219	0.0699239	3	796	6.0832	0	1
		797	4.2365	4.91172	4																									797	8.34665	5.02933	4	797	19.0666	32.7688	4	797	5.27626	0	1	797	6.12941	0	1
		798	4.46474	4.90903	4																									798	8.237	4.71427	4	798	19.0748	32.3525	4	798	5.46791	0	1	798	6.13744	0	1
		799	4.66927	4.85112	4																									799	8.12924	4.45982	4	799	19.2521	30.2868	4	799	5.33062	0	1	799	6.20083	0	1
		800	4.63943	4.63025	4																									800	8.02094	4.16082	4	800	19.2711	28.1118	4	800	5.29332	0.008803	3	800	6.3066	0	1
		801	4.49678	4.19782	4																									801	7.96262	3.99045	4	801	19.2852	26.7035	4	801	5.0802	0.0120944	3	801	6.39417	0	1
		802	4.42283	5.16681	4																									802	7.93051	3.86072	4	802	19.3889	28.5313	4	802	5.00583	0	1	802	6.36263	0	1
		803	4.50402	4.83527	4																									803	7.9263	3.45659	4	803	19.4424	29.2968	4	803	4.94024	0	1	803	6.33816	0	1
		804	4.48272	5.32974	4																									804	7.87259	4.05209	4	804	19.3702	29.5443	4	804	5.04611	0	1	804	6.22316	0	1
		805	4.19685	5.36607	4																									805	7.97308	4.20097	4	805	19.3257	29.3374	4	805	5.26916	0	1	805	6.18025	0	1
		806	4.09666	5.56093	4																									806	7.9252	4.76553	4	806	19.4367	30.2852	4	806	5.343	0.818284	3	806	6.03928	0	1
		807	3.98172	5.25057	4																									807	7.86279	5.8818	4	807	19.407	30.6147	4	807	5.41076	0.442547	3	807	5.94888	0	1
		808	3.60964	5.46868	4																									808	7.88428	6.16873	4	808	19.1277	29.3932	4	808	5.25278	0.330045	3	808	6.08053	0	1
		809	3.62768	5.76837	4																									809	7.89468	6.16738	4	809	19.0344	30.753	4	809	5.29733	0.474403	3	809	6.16478	0	1
		810	3.30336	6.07007	4																									810	7.87601	6.28508	4	810	19.0179	31.582	4	810	5.38684	0.404649	3	810	6.03833	0	1
		811	3.23966	6.27914	4																									811	7.90125	6.39574	4	811	18.9039	31.3494	4	811	5.24602	0.958897	3	811	6.10549	0	1
		812	3.0702	6.48488	4																									812	8.02145	6.26566	4	812	18.1315	30.3173	4	812	5.1023	0.558665	3	812	6.21798	0	1
		813	2.95969	6.58978	4																									813	8.19583	5.83858	4	813	18.319	31.3129	4	813	5.09222	0	1	813	6.30656	0	1
		814	2.92387	6.5463	4																									814	8.13251	6.37166	4	814	18.8696	30.0928	4	814	4.99062	0	1	814	6.2462	0	1
		815	2.98925	6.56223	4																									815	8.2226	7.25416	4	815	18.9696	29.0101	4	815	5.10017	0	1	815	6.35706	0	1
		816	2.98766	6.50706	4																									816	8.27429	6.72243	4	816	18.7987	28.6362	4	816	4.9974	0	1	816	6.44563	0	1
		817	3.22984	6.27159	4																									817	8.2699	7.0259	4	817	18.7959	28.8112	4	817	4.9863	0	1	817	6.63461	0	1
		818	3.09816	6.47627	4																									818	8.15286	5.97343	4	818	18.7798	26.8033	4	818	4.98919	1.32347	3	818	6.85955	0	1
		819	3.15562	6.61167	4																									819	8.19531	5.62984	4	819	18.7628	26.6314	4	819	5.08209	1.63381	3	819	7.09252	0	1
		820	3.1832	6.82381	4																									820	8.35306	5.83895	4	820	18.782	26.2343	4	820	5.03831	1.80276	3	820	7.21221	0	1
		821	3.39544	6.90029	4																									821	8.45789	5.27021	4	821	18.7075	26.5888	4	821	5.02715	1.76971	3	821	7.29953	0	1
		822	3.36887	6.98046	4																									822	8.52759	5.14546	4	822	18.7401	25.0422	4	822	5.02694	1.60712	3	822	7.17226	0	1
		823	3.49363	7.4813	4																									823	8.61096	6.37153	4	823	18.4838	25.2622	4	823	5.02149	1.55626	3	823	8.03386	0	1
		824	3.5692	7.64591	4																									824	8.68686	6.95473	4	824	17.8563	24.9839	4	824	4.98208	1.80505	3	824	8.42906	0	1
		825	3.78957	7.24194	4																									825	8.88632	6.17821	4	825	14.4135	24.32	4	825	5.03404	2.477	3	825	8.578	0	1
		826	3.56863	7.16557	4																									826	8.89774	5.89572	4	826	13.6201	22.9056	4	826	5.14032	2.72582	3	826	8.27415	0	1
		827	3.51427	6.9838	4																									827	8.97287	5.8803	4	827	13.3483	22.6315	4	827	5.11579	2.24578	3	827	8.38456	0	1
		828	3.47186	6.81046	4																									828	8.94147	6.36329	4	828	13.9709	21.6298	4	828	5.02142	1.29149	3	828	8.28719	0	1
		829	3.26472	5.77373	4																									829	8.96494	6.83229	4	829	13.7476	22.5314	4	829	5.04208	1.9658	3	829	8.31896	0	1
		830	3.19545	4.95202	4																									830	9.18872	6.61425	4	830	14.0212	22.2942	4	830	4.95416	1.96221	3	830	8.53779	0	1
		831	3.25688	4.02978	4																									831	9.46762	6.40255	4	831	13.9337	21.8594	4	831	4.96897	0.863889	3	831	8.71818	0	1
		832	3.46396	3.64234	4																									832	9.52069	6.34036	4	832	13.444	21.8884	4	832	4.87472	0	1	832	8.57781	0	1
		833	3.17801	3.06524	4																									833	9.47595	5.92858	4	833	13.6296	22.2824	4	833	4.75123	0	1	833	8.5121	0.779711	3
		834	2.99854	4.03811	4																									834	9.58636	7.16348	4	834	13.8148	22.5207	4	834	4.73854	0	1	834	8.56151	0.809678	3
		835	2.89445	5.53845	4																									835	9.64398	7.6243	4	835	14.3683	22.6181	4	835	4.79023	0	1	835	8.67342	1.37108	3
		836	3.24863	4.98384	4																									836	9.69714	7.8209	4	836	14.2247	22.9547	4	836	4.698	0	1	836	8.71056	1.39464	3
		837	3.08952	5.41398	4																									837	9.84509	7.30728	4	837	15.0211	23.2105	4	837	4.60538	0	1	837	8.87242	2.29747	3
		838	3.02773	5.47494	4																									838	9.90021	8.58434	4	838	16.279	22.817	4	838	4.48866	0	1	838	8.74871	2.18115	3
		839	2.85341	4.96642	4																									839	10.0365	9.14024	4	839	15.8735	23.6776	4	839	4.35906	0	1	839	8.92141	1.82997	3
		840	2.99409	5.40499	4																									840	10.323	8.44246	4	840	15.9689	25.6967	4	840	4.18494	0	1	840	9.05388	1.41939	3
		841	3.15903	7.07923	4																									841	10.6222	7.8809	4	841	16.7802	25.6802	4	841	4.15275	0	1	841	8.95883	1.91464	3
		842	3.05515	6.39943	4																									842	10.6288	5.74904	4	842	18.5587	24.9206	4	842	3.89252	0	1	842	8.86204	1.47539	3
		843	3.1732	6.27524	4																									843	10.794	6.77614	4	843	18.1951	24.8322	4	843	3.73957	0	1	843	8.78684	1.95493	3
		844	2.7642	6.3437	4																									844	10.8337	7.77609	4	844	17.1805	24.6236	4	844	4.02035	0	1	844	8.64817	1.83015	3
		845	2.95293	5.09751	4																									845	10.7722	7.48121	4	845	16.9384	25.3589	4	845	4.31427	0	1	845	8.67266	2.28111	3
		846	2.75404	6.02937	4																									846	10.7244	6.88113	4	846	17.3735	25.3875	4	846	3.78963	0	1	846	8.60968	1.54693	3
		847	2.82051	5.7939	4																									847	10.5692	7.12062	4	847	17.6359	24.8146	4	847	3.81481	0	1	847	8.53498	0.888635	3
		848	3.10828	5.92119	4																									848	10.4741	6.22463	4	848	17.4494	25.2246	4	848	3.7372	0	1	848	8.57485	0.609223	3
		849	3.31077	5.85001	4																									849	10.4155	5.74016	4	849	16.9026	25.7726	4	849	3.66598	0	1	849	8.53802	1.77205	3
		850	3.17439	5.85728	4																									850	10.3956	4.63849	4	850	17.0141	23.7823	4	850	3.5573	0	1	850	8.67211	1.78173	3
		851	3.06477	5.78262	4																									851	10.3698	4.4299	4	851	17.0804	25.068	4	851	3.65757	0	1	851	8.71705	1.39776	3
		852	3.21992	4.67875	4																									852	10.3166	4.21736	4	852	17.5046	26.6465	4	852	3.58785	0	1	852	8.71115	1.44366	3
		853	3.21105	3.5383	4																									853	10.1627	4.23284	4	853	17.8384	27.71	4	853	3.59171	0	1	853	8.77299	0.928548	3
		854	3.35575	4.22225	4																									854	10.0995	4.14075	4	854	18.1818	29.0404	4	854	3.63534	0	1	854	8.92052	1.0874	3
		855	3.40491	3.84703	4																									855	9.85742	4.72712	4	855	18.1062	28.4855	4	855	3.69703	0	1	855	9.03453	1.07551	3
		856	3.56763	4.16214	4																									856	10.0032	3.88095	4	856	17.7854	27.2431	4	856	3.70513	0	1	856	9.11144	1.5271	3
		857	3.81313	4.02009	4																									857	10.1061	4.43652	4	857	17.4602	26.4753	4	857	3.7	0	1	857	9.3264	3.04131	3
		858	3.73183	3.68429	4																									858	10.0817	4.07955	4	858	17.4275	26.4991	4	858	3.74106	0	1	858	9.44089	2.1144	3
		859	3.55079	3.64414	4																									859	10.0949	4.02014	4	859	17.1207	27.0189	4	859	3.74441	0	1	859	9.55099	2.22907	3
		860	3.53642	3.56387	4																									860	10.0256	4.30836	4	860	17.0718	26.2524	4	860	3.70138	0	1	860	9.58724	1.36985	3
		861	3.62726	3.71791	4																									861	9.81839	4.84023	4	861	17.5541	26.479	4	861	3.75118	0	1	861	9.45647	0.931287	3
		862	3.80488	2.93596	4																									862	9.80655	4.61103	4	862	17.8139	26.7721	4	862	2.99172	0	1	862	9.4614	0.79009	3
		863	3.69956	3.07991	4																									863	9.68369	5.08299	4	863	17.7218	27.3738	4	863	3.28376	0	1	863	9.46404	0.755801	3
		864	3.66696	2.85177	4																									864	9.673	4.91659	4	864	17.6779	28.3157	4	864	3.49595	0	1	864	9.25953	0.936648	3
		865	3.54668	3.28955	4																									865	9.58762	4.71456	4	865	18.2951	25.2805	4	865	4.16828	0	1	865	9.02775	1.07919	3
		866	3.67406	3.66001	4																									866	9.60281	4.59434	4	866	18.7048	24.179	4	866	4.4119	0	1	866	8.90825	0.798159	3
		867	3.91908	2.99671	4																									867	9.60422	4.36485	4	867	17.7415	22.4261	4	867	4.80836	0	1	867	8.89658	0.543483	3
		868	4.11652	1.92512	4																									868	9.59073	4.10237	4	868	16.2521	22.4318	4	868	5.02198	0	1	868	8.86097	1.70689	3
		869	3.77947	2.04808	4																									869	9.58875	3.68023	4	869	16.8385	23.2427	4	869	5.00723	0	1	869	8.76914	1.29616	3
		870	3.8414	2.04056	4																									870	9.61526	3.71685	4	870	17.962	23.5984	4	870	4.93024	0	1	870	8.58555	0.604389	3
		871	3.80972	1.87502	4																									871	9.6058	4.5333	4	871	19.5421	22.9083	4	871	4.99539	0	1	871	8.34296	0	1
		872	3.61095	1.84912	4																									872	9.52682	4.55445	4	872	20.083	23.1554	4	872	5.04712	0	1	872	8.24985	0	1
		873	3.52482	1.80579	4																									873	9.50388	4.06269	4	873	20.1409	23.5826	4	873	5.32357	0	1	873	8.30381	0	1
		874	3.62156	1.71664	4																									874	9.4537	3.92703	4	874	20.1935	24.209	4	874	5.55526	0	1	874	8.22392	0	1
		875	3.61658	2.27304	4																									875	9.4321	4.69023	4	875	19.7513	24.0139	4	875	5.77643	0	1	875	8.13121	0	1
		876	3.59882	2.65999	4																									876	9.41122	5.22769	4	876	19.8713	23.2904	4	876	5.94415	0	1	876	7.91484	0	1
		877	3.75457	2.76515	4																									877	9.30292	3.87258	4	877	20.4244	22.9405	4	877	6.01113	0	1	877	7.62948	0	1
		878	3.74094	2.56628	4																									878	9.33389	3.92234	4	878	20.8229	22.2278	4	878	6.09204	0	1	878	7.55383	0	1
		879	3.61314	2.32713	4																									879	9.28305	4.19325	4	879	20.7379	23.7559	4	879	6.19684	0	1	879	7.50451	0	1
		880	3.68472	2.1609	4																									880	9.25992	4.16073	4	880	20.5356	25.0679	4	880	6.13614	0	1	880	7.43237	0	1
		881	3.59416	3.09983	4																									881	9.32974	4.46852	4	881	20.1459	23.49	4	881	6.11165	0	1	881	7.3553	0	1
		882	3.44809	3.69679	4																									882	9.34579	5.14516	4	882	20.1139	23.2501	4	882	6.25213	0	1	882	7.3099	0	1
		883	3.61897	4.30998	4																									883	9.49081	5.78133	4	883	20.2639	24.1875	4	883	6.82102	0	1	883	7.33055	0	1
		884	3.87422	4.24322	4																									884	9.56436	5.74453	4	884	20.0488	25.9	4	884	6.94183	0	1	884	7.62963	0	1
		885	3.99265	3.13701	4																									885	9.48621	5.89865	4	885	20.1027	26.4752	4	885	6.91518	0	1	885	7.48101	0	1
		886	4.0537	3.27048	4																									886	9.41684	7.04219	4	886	19.7283	28.5192	4	886	7.17934	0	1	886	7.62832	0	1
		887	3.8851	4.1011	4																									887	9.49466	7.56809	4	887	19.2366	24.3342	4	887	6.86368	0	1	887	7.63815	0	1
		888	3.83041	3.503	4																									888	9.42624	7.24093	4	888	18.9913	23.8118	4	888	6.73578	0	1	888	7.62763	0	1
		889	3.94138	4.31615	4																									889	9.40787	7.35298	4	889	18.8988	24.0855	4	889	6.68569	0	1	889	7.59184	0	1
		890	3.8954	4.79413	4																									890	9.28131	7.97379	4	890	18.8166	23.6834	4	890	6.93493	0	1	890	7.80073	0	1
		891	3.86659	5.10012	4																									891	9.01788	7.56788	4	891	18.697	24.8915	4	891	6.85741	0	1	891	7.8379	0	1
		892	3.31694	4.93798	4																									892	8.68201	7.98594	4	892	18.6189	27.2857	4	892	6.94839	0	1	892	7.96124	0.401736	3
		893	3.27565	2.99169	4																									893	8.47873	8.34642	4	893	18.4771	27.538	4	893	7.07374	0	1	893	8.0051	3.31706	3
		894	3.48309	3.9111	4																									894	8.50534	8.63295	4	894	18.2713	27.7321	4	894	6.95133	0	1	894	8.16412	4.46903	3
		895	3.36597	3.52235	4																									895	8.38568	8.66541	4	895	17.9221	30.1761	4	895	6.9772	0	1	895	8.26608	2.76543	3
		896	3.01129	3.64452	4																									896	8.1088	8.49871	4	896	17.7253	26.7669	4	896	7.16493	0	1	896	8.3469	1.57365	3
		897	3.01218	4.33069	4																									897	8.01904	6.42197	4	897	17.5208	26.0894	4	897	7.45751	0	1	897	8.40488	1.46179	3
		898	2.89317	4.54844	4																									898	7.88232	6.67734	4	898	17.1395	27.0292	4	898	7.35848	0	1	898	8.4564	1.54828	3
		899	3.0725	2.27143	4																									899	7.74542	8.10122	4	899	16.5989	28.4784	4	899	7.56956	0	1	899	8.53083	3.13377	3
		900	3.15273	1.30001	4																									900	7.56229	6.78337	4	900	16.668	28.5876	4	900	7.38162	0	1	900	8.60422	4.71444	3
		901	3.38143	3.00118	4																									901	7.40579	7.26402	4	901	16.7171	24.2354	4	901	7.49396	0	1	901	8.69626	2.96038	3
		902	3.65316	4.49367	4																									902	7.29523	6.78325	4	902	16.4012	24.4397	4	902	7.66439	0	1	902	8.6811	1.2223	3
		903	3.83255	3.18537	4																									903	7.1376	7.83733	4	903	16.6461	24.7566	4	903	7.99585	0	1	903	8.80601	3.05853	3
		904	4.01637	2.95669	4																									904	7.02194	7.53708	4	904	16.6703	24.7067	4	904	8.1753	0	1	904	9.02953	3.12277	3
		905	3.93587	3.80578	4																									905	6.87253	7.44944	4	905	16.5051	23.0646	4	905	8.09625	0	1	905	9.09384	2.56166	3
		906	4.17311	4.27676	4																									906	6.7887	6.75437	4	906	16.4389	21.6557	4	906	8.05008	0	1	906	9.10583	2.32936	3
		907	4.50545	3.52564	4																									907	6.72632	6.47142	4	907	17.393	22.0103	4	907	8.09252	0	1	907	9.22239	1.21818	3
		908	4.44328	3.49281	4																									908	6.58203	6.00392	4	908	17.9554	24.0028	4	908	8.46091	0	1	908	9.46643	0.0071931	3
		909	4.47577	2.49211	4																									909	6.51651	5.38615	4	909	17.8555	24.2599	4	909	8.64408	0	1	909	9.57026	0	1
		910	4.5425	2.14766	4																									910	6.20386	6.5733	4	910	18.3616	24.7738	4	910	8.59982	0	1	910	9.68127	0	1
		911	4.40352	0.618339	4																									911	5.92038	6.83072	4	911	18.4902	25.0188	4	911	8.73724	0	1	911	9.76067	0.453342	3
		912	4.43581	0.966696	4																									912	5.57166	7.13637	4	912	19.0551	24.3671	4	912	8.67386	0	1	912	9.73525	1.03269	3
		913	4.37292	1.11865	4																									913	5.15039	7.06416	4	913	18.5387	24.1492	4	913	8.57333	0	1	913	9.85352	1.01985	3
		914	4.32944	1.32835	4																									914	4.98849	7.20884	4	914	18.2929	23.948	4	914	8.38218	0	1	914	9.79472	0.807006	3
		915	4.39943	2.52823	4																									915	4.79663	6.48062	4	915	18.7402	23.4681	4	915	8.36053	0	1	915	9.76512	1.18082	3
		916	4.38321	2.73232	4																									916	4.8024	5.89329	4	916	19.2302	23.5486	4	916	8.39819	0	1	916	9.49798	2.1753	3
		917	4.54438	3.32211	4																									917	4.66629	6.23537	4	917	20.4532	24.5596	4	917	8.58771	0	1	917	9.58765	1.54435	3
		918	4.37222	3.14963	4																									918	4.64291	5.9446	4	918	20.6305	25.2409	4	918	8.46695	0	1	918	9.65939	2.20522	3
		919	4.25206	2.85365	4																									919	4.56348	5.32472	4	919	21.0399	26.9278	4	919	8.46431	0	1	919	9.48479	3.28735	3
		920	4.12926	1.72845	4																									920	4.65256	4.84046	4	920	21.1583	27.2627	4	920	8.39382	0	1	920	9.45612	3.95523	3
		921	4.22826	1.91744	4																									921	4.73807	5.36599	4	921	21.3725	27.7584	4	921	8.23881	0	1	921	9.40225	3.86825	3
		922	4.12423	1.77736	4																									922	4.92313	5.14932	4	922	21.7215	26.4041	4	922	8.27767	0	1	922	9.33856	3.28295	3
		923	4.1643	2.47769	4																									923	4.90323	5.48758	4	923	21.8815	25.7274	4	923	8.32301	0	1	923	9.43041	3.28318	3
		924	4.16904	1.56985	4																									924	4.93729	6.05433	4	924	21.8525	25.7236	4	924	8.19595	0	1	924	9.41423	2.86199	3
		925	4.04858	1.53998	4																									925	4.8765	5.65191	4	925	21.9468	25.8367	4	925	8.05396	0	1	925	9.33554	2.53736	3
		926	3.93571	1.40133	4																									926	4.76434	4.67648	4	926	22.3595	25.7079	4	926	7.99408	0	1	926	9.09136	1.80999	3
		927	3.84048	1.66175	4																									927	4.76843	4.81784	4	927	22.666	25.2644	4	927	7.82396	0	1	927	9.05538	1.29042	3
		928	3.54874	1.72738	4																									928	5.22418	4.41597	4	928	22.785	24.5954	4	928	7.76516	0	1	928	9.02639	1.58185	3
		929	3.50817	1.54195	4																									929	4.71741	3.99059	4	929	23.0325	24.0403	4	929	7.67627	0	1	929	9.11937	1.7701	3
		930	3.33488	0.859188	4																									930	4.82654	4.1759	4	930	23.1507	23.4815	4	930	7.59525	0	1	930	9.1668	2.08607	3
		931	3.11899	1.00977	4																									931	4.57416	4.17021	4	931	23.1114	24.3505	4	931	7.58104	0	1	931	9.21787	1.76514	3
		932	2.94769	1.30761	4																									932	4.64243	4.36409	4	932	23.0404	24.8073	4	932	7.41465	0	1	932	8.88787	2.48039	3
		933	2.94936	1.67642	4																									933	4.94434	3.98864	4	933	23.0676	24.9686	4	933	7.29879	0	1	933	8.48993	1.94513	3
		934	3.15311	1.59007	4																													934	23.1845	23.9561	4	934	7.28011	0	1	934	8.28652	1.93105	3
		935	2.71216	1.71227	4																													935	23.4237	26.2668	4	935	7.25955	0	1	935	8.55778	1.99253	3
		936	2.54323	1.87748	4																													936	23.5262	26.6386	4	936	7.12683	0	1	936	8.49006	1.79289	3
		937	2.68707	1.95401	4																													937	23.6276	26.8067	4	937	7.19745	0	1	937	8.38688	1.78583	3
		938	2.93668	3.10925	4																													938	23.6337	25.2636	4	938	7.27005	0	1	938	8.30754	1.59928	3
		939	2.89954	3.84964	4																													939	23.626	24.2009	4	939	7.14498	0	1	939	8.43292	1.58853	3
		940	2.85285	4.18432	4																													940	23.536	25.4976	4	940	7.11838	0	1	940	8.66146	1.42544	3
		941	2.94469	3.72653	4																													941	23.4137	26.7501	4	941	7.16083	0	1	941	8.84517	1.69424	3
		942	2.91293	2.13943	4																													942	23.2267	26.2157	4	942	7.16629	0	1	942	8.91661	2.25305	3
		943	2.96014	2.09537	4																													943	23.3286	27.1878	4	943	7.07362	0	1	943	9.13116	2.68455	3
		944	3.02372	2.20728	4																													944	23.3454	26.1765	4	944	7.10302	0	1	944	9.07295	2.80088	3
		945	2.85752	3.38204	4																													945	23.4035	24.2069	4	945	6.99316	0	1	945	9.06018	2.68559	3
		946	2.88225	3.86159	4																													946	23.3804	24.2369	4	946	6.87977	0	1	946	8.78049	1.87397	3
		947	3.03991	4.01617	4																													947	23.2085	24.325	4	947	6.98518	0	1	947	8.51306	1.55724	3
		948	2.92792	4.14602	4																													948	23.2541	23.9567	4	948	6.92216	0	1	948	8.35005	1.46269	3
		949	3.05061	2.83178	4																													949	23.2022	23.7469	4	949	6.96326	0	1	949	8.30645	1.70447	3
		950	2.80072	2.34231	4																													950	23.0678	23.5496	4	950	6.65726	0	1	950	8.36307	2.14718	3
		951	2.63879	2.77338	4																													951	22.8098	23.2502	4	951	6.67962	0	1	951	8.30688	1.70178	3
		952	2.60064	3.09723	4																													952	22.6623	23.0289	4	952	6.74674	0	1	952	8.37692	4.03542	3
		953	2.55869	2.93171	4																													953	22.3862	23.8345	4	953	6.78856	0	1	953	8.31183	2.60278	3
		954	2.56533	3.13366	4																													954	21.9207	25.5568	4	954	6.92272	0	1	954	8.31499	2.16217	3
		955	2.56869	3.17693	4																													955	21.7536	26.2596	4	955	7.11794	0	1	955	8.30879	2.44121	3
		956	2.47827	4.13089	4																													956	21.375	25.852	4	956	7.10666	0	1	956	8.22551	2.45675	3
		957	2.43382	3.85406	4																													957	21.832	25.3687	4	957	7.08053	0	1	957	8.30112	1.78526	3
		958	2.61964	4.47395	4																													958	21.5351	29.2729	4	958	7.11648	0	1	958	8.42444	1.01775	3
		959	2.6758	5.26886	4																													959	21.8261	29.3765	4	959	7.0685	0	1	959	8.4804	0.0094195	3
		960	2.61503	4.73488	4																													960	21.4767	29.9658	4	960	7.01453	0	1	960	8.55748	0	1
		961	2.82343	4.82774	4																													961	20.4054	29.8323	4	961	6.9635	0	1	961	8.69762	0	1
		962	2.87982	5.26561	4																													962	20.7003	29.3099	4	962	7.20069	0	1	962	8.77546	0.00556	3
		963	2.84159	4.85935	4																													963	21.8871	29.0736	4	963	7.26585	0	1	963	8.8632	0	1
		964	2.89505	4.78996	4																													964	21.871	29.0619	4	964	7.06615	0	1	964	8.95333	0	1
		965	2.83614	4.17846	4																													965	21.7867	28.1316	4	965	6.97751	0	1	965	9.08801	0	1
		966	2.87903	3.81808	4																													966	21.8173	28.7732	4	966	6.82794	0	1	966	9.1341	0	1
		967	3.29229	3.50229	4																													967	21.558	28.2197	4	967	6.72276	0	1	967	9.049	0.380682	3
		968	3.12754	4.29655	4																													968	21.4523	27.4713	4	968	6.83733	0	1	968	9.03917	1.06068	3
		969	2.96239	4.50321	4																													969	21.3444	26.3916	4	969	7.03043	0	1	969	9.1292	0.992081	3
		970	3.05312	3.8304	4																													970	21.2789	26.0326	4	970	6.98749	0	1	970	8.99318	1.28161	3
		971	3.12099	3.38301	4																													971	21.0529	24.4426	4	971	7.00436	0	1	971	8.94684	1.80029	3
		972	3.05864	3.81888	4																													972	20.7311	24.263	4	972	6.9106	0	1	972	8.94296	2.06041	3
		973	3.02257	3.95155	4																													973	20.3882	24.7814	4	973	6.82254	0	1	973	8.83735	2.03052	3
		974	3.03207	4.2979	4																													974	19.7119	25.0372	4	974	6.61156	0	1	974	8.8661	2.10052	3
		975	2.83853	4.64447	4																													975	19.1552	23.6413	4	975	6.28386	0	1	975	8.84189	2.55017	3
		976	2.61687	4.1595	4																													976	18.8925	23.2673	4	976	5.9165	0	1	976	8.95827	2.61137	3
		977	2.93701	4.54343	4																													977	18.7314	21.8522	4	977	5.78038	0.657549	3	977	8.68498	2.79267	3
		978	2.94038	4.34477	4																													978	18.9085	21.9791	4	978	5.92874	0.784099	3	978	8.72368	1.58763	3
		979	2.74702	4.62573	4																													979	19.4052	22.1856	4	979	5.73079	1.1118	3	979	8.51291	1.30102	3
		980	2.92352	4.68125	4																													980	19.0023	23.2681	4	980	6.0607	1.69611	3	980	8.30224	1.74671	3
		981	2.78719	4.09066	4																													981	19.0176	20.3482	4	981	6.33006	1.99019	3	981	8.27019	1.66366	3
		982	2.67245	3.38508	4																													982	18.7495	20.1137	4	982	6.52476	1.84036	3	982	8.18625	1.94034	3
		983	2.86027	2.36704	4																													983	18.5675	20.0397	4	983	6.75391	2.42707	3	983	8.18524	1.43881	3
		984	2.69463	3.03127	4																													984	18.5815	18.88	4	984	6.86149	2.54014	3	984	8.04503	1.80437	3
		985	2.64863	3.43532	4																													985	17.4461	20.4851	4	985	6.85521	2.96276	3	985	7.90348	2.33868	3
		986	2.80653	3.72943	4																													986	17.214	21.0797	4	986	6.71088	3.02434	3	986	7.63805	2.29861	3
		987	2.89611	4.60403	4																													987	18.7435	21.4465	4	987	6.70351	3.25802	3	987	7.36582	2.55061	3
		988	2.70798	5.12893	4																													988	18.7972	21.9466	4	988	6.73127	3.99807	3	988	7.19456	3.954	3
		989	2.92667	5.1283	4																													989	18.4357	22.9146	4	989	6.84122	4.06295	3	989	7.25087	3.84179	3
		990	2.95412	4.48675	4																													990	17.4326	23.9984	4	990	6.81345	4.09246	3	990	7.12575	4.28651	3
		991	3.0536	4.10218	4																													991	17.3794	24.9942	4	991	6.9419	4.406	3	991	6.97208	5.32094	3
		992	3.16524	4.30291	4																													992	18.4765	25.5066	4	992	6.96527	4.51973	3	992	6.88579	5.68179	3
		993	3.32422	3.75509	4																													993	18.1805	26.6204	4	993	7.00203	4.4991	3	993	6.84803	5.99837	3
		994	3.33415	2.95822	4																													994	18.4045	26.6274	4	994	6.88984	4.65514	3	994	7.27517	5.60876	3
		995	3.43296	2.96861	4																													995	17.9989	27.2828	4	995	6.79478	3.87105	3	995	7.29749	5.76554	3
		996	3.57316	3.47598	4																													996	18.2818	26.8883	4	996	6.99968	4.48083	3	996	7.46013	5.73028	3
		997	3.47575	4.58873	4																													997	17.6743	26.5342	4	997	7.01711	4.57146	3	997	7.08071	5.30989	3
		998	3.6097	5.33528	4																													998	17.3607	28.7349	4	998	6.96561	3.7377	3	998	7.04325	3.84639	3
		999	3.6135	4.72254	4																													999	17.9591	28.978	4	999	6.89703	4.34008	3	999	7.03363	3.42211	3
		1000	3.84866	3.90982	4																													1000	17.7619	29.5143	4	1000	6.83868	3.8515	3	1000	6.4677	3.85256	3
		1001	4.05552	4.13684	4																													1001	17.9377	28.7249	4	1001	6.79843	4.81743	3	1001	6.69644	4.67533	3
		1002	3.9082	3.57694	4																													1002	18.0313	28.3411	4	1002	6.71591	4.50757	3	1002	6.57184	5.0412	3
		1003	3.92081	3.10684	4																													1003	18.042	29.0961	4	1003	6.79127	5.88029	3	1003	6.4593	5.00902	3
		1004	4.02081	3.6087	4																													1004	18.0058	29.4507	4	1004	6.82924	6.33641	3	1004	6.27549	4.76833	3
		1005	4.11563	3.27803	4																													1005	18.0537	29.6047	4	1005	6.79705	5.73706	3	1005	6.09407	3.94708	3
		1006	3.96395	3.49272	4																													1006	18.4556	29.5335	4	1006	6.52793	5.22987	3	1006	5.93996	4.65631	3
		1007	3.9335	2.94899	4																													1007	18.4724	29.8333	4	1007	6.31164	4.33645	3	1007	5.61435	4.3645	3
		1008	3.92202	2.47428	4																													1008	18.6002	29.7106	4	1008	6.42411	4.66974	3	1008	5.58887	5.19876	3
		1009	3.76153	3.38876	4																													1009	18.4492	29.0701	4	1009	6.32716	4.55272	3	1009	5.60459	5.09385	3
		1010	3.63069	3.52909	4																													1010	18.3799	28.4786	4	1010	6.32398	3.67888	3	1010	5.65938	6.0426	3
		1011	3.47205	3.12052	4																													1011	18.2138	29.1909	4	1011	6.39557	3.32131	3	1011	5.95173	6.73053	3
		1012	3.13851	2.66414	4																													1012	17.4552	29.3164	4	1012	6.40712	3.37869	3	1012	6.39739	6.42086	3
		1013	3.23313	3.00379	4																													1013	16.8303	29.3318	4	1013	6.51678	3.04405	3	1013	6.5575	5.83267	3
		1014	3.2985	2.72376	4																													1014	17.8083	28.7442	4	1014	6.46956	2.96586	3	1014	6.69667	5.24828	3
		1015	3.00018	2.55466	4																													1015	17.5855	28.3469	4	1015	6.66576	3.46785	3	1015	6.88334	4.68026	3
		1016	2.66772	2.69206	4																													1016	17.6508	28.4863	4	1016	6.75855	3.48286	3	1016	6.95332	4.37326	3
		1017	2.69135	2.55945	4																													1017	17.3909	27.874	4	1017	6.37883	4.78693	3	1017	7.24055	4.69317	3
		1018	2.93108	1.9854	4																													1018	17.1713	25.5236	4	1018	6.32932	5.18861	3	1018	7.37569	4.89716	3
		1019	3.14123	2.57323	4																													1019	16.8158	25.8388	4	1019	6.35288	4.90887	3	1019	7.47895	5.57712	3
		1020	2.94958	2.61765	4																													1020	16.4075	25.758	4	1020	6.41736	5.02485	3	1020	7.14833	5.28622	3
		1021	2.86536	2.6829	4																													1021	16.1542	26.7895	4	1021	6.57417	4.81044	3	1021	6.9254	4.55352	3
		1022	2.76296	2.7281	4																													1022	15.9971	27.6459	4	1022	6.79943	3.66332	3	1022	6.8939	3.98074	3
		1023	2.58566	2.68461	4																													1023	15.9737	26.9404	4	1023	7.01318	3.17999	3	1023	6.97919	3.56952	3
		1024	2.62763	3.34543	4																													1024	16.0109	25.6508	4	1024	7.1677	3.92892	3	1024	6.89628	3.23788	3
		1025	2.72767	3.85017	4																													1025	16.1111	26.058	4	1025	7.43962	3.80627	3	1025	6.82673	3.33454	3
		1026	2.90454	4.14967	4																													1026	16.2048	25.1666	4	1026	7.55165	3.63705	3	1026	6.72021	3.55412	3
		1027	3.12709	3.70929	4																													1027	16.1639	24.4093	4	1027	7.5683	3.13998	3	1027	6.86239	3.72895	3
		1028	3.199	3.08262	4																													1028	15.6585	24.0344	4	1028	7.67761	3.1335	3	1028	6.78675	3.52268	3
		1029	3.3123	2.14397	4																													1029	15.9135	24.2765	4	1029	7.57519	3.43565	3	1029	6.84338	3.01218	3
		1030	3.43851	1.92814	4																													1030	16.6927	25.1376	4	1030	7.50654	4.30327	3	1030	6.87014	3.29419	3
		1031	3.40643	1.60508	4																													1031	17.3755	24.8128	4	1031	7.4269	4.8063	3	1031	6.93725	2.86995	3
		1032	3.5769	1.88003	4																													1032	15.911	23.7978	4	1032	7.42099	4.64296	3	1032	6.97038	2.43316	3
		1033	3.75698	1.79813	4																													1033	16.4158	23.5999	4	1033	7.40461	4.54558	3	1033	7.11918	2.87292	3
		1034	3.89896	3.6623	4																													1034	16.5994	24.3572	4	1034	7.27673	3.71901	3	1034	7.15443	2.67339	3
		1035	3.68334	2.79714	4																													1035	16.1957	24.4114	4	1035	7.36291	3.23917	3	1035	7.16154	2.92019	3
		1036	3.47348	2.62469	4																													1036	15.9055	23.3424	4	1036	7.38648	2.7198	3	1036	7.35383	2.85215	3
		1037	3.57657	3.46361	4																													1037	15.5157	24.4856	4	1037	7.36528	2.59643	3	1037	7.49123	3.0815	3
		1038	3.67263	3.72717	4																													1038	15.4105	25.127	4	1038	7.33297	2.51489	3	1038	7.55061	3.36009	3
		1039	3.66334	2.93782	4																													1039	15.6478	25.4577	4	1039	7.24335	2.87107	3	1039	7.58324	3.24159	3
		1040	3.61412	3.55967	4																													1040	16.1956	25.9988	4	1040	7.10838	3.38973	3	1040	7.70056	3.07519	3
		1041	3.57829	3.56769	4																													1041	17.1275	26.8036	4	1041	7.00032	3.26405	3	1041	7.71132	2.77668	3
		1042	3.42052	3.30409	4																													1042	18.5984	27.6366	4	1042	6.87356	3.32139	3	1042	7.69968	2.26502	3
		1043	3.47238	2.48282	4																													1043	20.6559	27.4658	4	1043	6.73608	2.99439	3	1043	7.42219	2.12923	3
		1044	3.14906	3.00751	4																													1044	20.9334	26.4795	4	1044	6.78439	2.86173	3	1044	7.54148	2.25705	3
		1045	2.94542	3.98821	4																													1045	21.3864	26.5415	4	1045	6.72581	2.73058	3	1045	7.68478	1.97283	3
		1046	3.00314	3.87641	4																													1046	21.9133	27.1102	4	1046	6.72946	2.17432	3	1046	7.54341	2.03861	3
		1047	2.6534	3.58574	4																													1047	22.4259	27.4093	4	1047	6.69496	1.16589	3	1047	7.6674	2.05753	3
		1048	2.41494	2.97758	4																													1048	22.5677	25.535	4	1048	6.59462	0.785631	3	1048	7.208	1.85933	3
		1049	2.3793	2.93158	4																													1049	22.9854	26.078	4	1049	6.80061	2.14869	3	1049	6.7338	2.00553	3
		1050	2.30945	3.38933	4																													1050	23.0447	26.2913	4	1050	7.01474	2.44171	3	1050	6.77559	2.99156	3
		1051	2.2243	6.55791	4																													1051	22.834	26.5001	4	1051	6.97243	3.17328	3	1051	6.80211	2.89209	3
		1052	2.26453	6.25628	4																													1052	22.6051	26.8041	4	1052	6.855	3.43794	3	1052	6.92188	2.7773	3
		1053	2.21207	6.60936	4																													1053	22.4203	26.9502	4	1053	6.84482	2.91562	3	1053	6.91487	2.16878	3
		1054	2.2984	5.32512	4																													1054	22.3523	27.7263	4	1054	6.78345	1.72891	3	1054	6.87222	2.39676	3
		1055	2.40479	5.22167	4																													1055	22.2889	27.1862	4	1055	6.6363	1.41603	3	1055	6.85183	2.38349	3
		1056	2.59219	4.7098	4																													1056	22.148	27.1362	4	1056	6.82227	1.85207	3	1056	6.82381	2.40397	3
		1057	2.78717	4.00698	4																													1057	22.1226	25.7509	4	1057	6.81754	2.54101	3	1057	6.60748	2.20928	3
		1058	2.88598	4.35153	4																													1058	22.007	24.9888	4	1058	6.94344	2.81715	3	1058	6.62477	1.82481	3
		1059	2.98382	3.75976	4																													1059	22.123	24.6403	4	1059	6.94257	2.81134	3	1059	6.56755	2.50171	3
		1060	2.91757	3.28376	4																													1060	22.1156	26.3281	4	1060	6.69198	2.1362	3	1060	6.37875	3.81739	3
		1061	2.69361	3.52136	4																													1061	22.0677	24.6325	4	1061	6.80628	2.16641	3	1061	6.46153	3.53424	3
		1062	2.60712	3.81293	4																													1062	22.3411	23.4163	4	1062	6.91988	1.57248	3	1062	6.42356	3.1057	3
		1063	2.65042	4.28516	4																													1063	22.4149	22.5156	4	1063	6.93726	2.53677	3	1063	6.65475	2.49876	3
		1064	2.54364	4.61704	4																													1064	22.0785	23.3667	4	1064	6.87074	2.80267	3	1064	6.64412	2.59936	3
		1065	2.60478	5.11476	4																													1065	22.9007	23.6527	4	1065	6.92905	2.81394	3	1065	6.75224	2.4323	3
		1066	2.28423	4.29518	4																													1066	22.4257	23.0714	4	1066	7.05285	3.10544	3	1066	6.83654	2.27311	3
		1067	2.24992	4.076	4																													1067	22.4203	22.5014	4	1067	7.07895	3.33112	3	1067	6.85579	2.47561	3
		1068	2.51928	4.25102	4																													1068	22.4345	24.3361	4	1068	7.27711	3.637	3	1068	7.01068	2.67719	3
		1069	2.56313	4.84004	4																													1069	22.6656	25.7403	4	1069	7.29516	3.30653	3	1069	7.10818	1.86732	3
		1070	2.61742	4.69023	4																													1070	22.6576	25.6214	4	1070	7.05423	3.37453	3	1070	7.24835	1.91322	3
		1071	2.71497	4.73494	4																													1071	22.4603	21.2506	4	1071	7.10644	4.00692	3	1071	7.26719	2.14953	3
		1072	2.99121	4.77055	4																													1072	22.4509	22.2128	4	1072	7.1147	3.52894	3	1072	7.32886	1.75649	3
		1073	3.1849	4.56806	4																													1073	22.1435	22.4972	4	1073	7.15018	3.66918	3	1073	7.21613	2.19739	3
		1074	3.35552	3.89993	4																													1074	21.9604	20.2586	4	1074	7.1778	2.36187	3	1074	7.01513	3.49245	3
		1075	3.29577	3.72005	4																													1075	22.2352	20.2513	4	1075	7.32777	2.41581	3	1075	7.01149	3.38087	3
		1076	3.27191	2.83757	4																													1076	22.4917	21.103	4	1076	7.31977	2.4576	3	1076	6.85255	3.24847	3
		1077	3.5396	2.85113	4																													1077	22.5378	20.8486	4	1077	7.32204	2.16368	3	1077	6.43907	3.20317	3
		1078	3.6999	3.45371	4																													1078	22.5964	20.7595	4	1078	7.33627	2.59602	3	1078	6.20399	3.50723	3
		1079	4.23943	4.47191	4																													1079	22.7708	20.4023	4	1079	7.45363	2.42014	3	1079	6.06413	3.58702	3
		1080	3.98164	2.84682	4																													1080	22.7646	20.7645	4	1080	7.19867	3.34765	3	1080	6.11827	3.83323	3
		1081	3.95625	2.64922	4																													1081	22.6845	20.9857	4	1081	7.21231	3.58	3	1081	6.269	4.31318	3
		1082	4.25436	3.53083	4																													1082	22.6996	20.6033	4	1082	7.42842	3.23299	3	1082	6.32513	5.46059	3
		1083	4.00958	3.8461	4																													1083	22.7072	20.2858	4	1083	7.51818	3.13859	3	1083	6.34614	4.85127	3
		1084	4.13581	3.19957	4																													1084	22.5992	19.656	4	1084	7.48006	3.2941	3	1084	6.35123	4.33895	3
		1085	4.2605	4.17782	4																													1085	22.9277	24.0929	4	1085	7.51727	3.75427	3	1085	6.13686	4.35753	3
		1086	4.47351	4.51512	4																													1086	23.1817	26.1088	4	1086	7.52156	4.09838	3	1086	6.19266	3.45072	3
		1087	4.59961	5.78293	4																													1087	23.342	31.6771	4	1087	7.38755	4.54814	3	1087	6.29916	3.72781	3
		1088	4.56762	4.36473	4																													1088	23.4062	32.054	4	1088	7.45552	4.69539	3	1088	6.26221	3.31493	3
		1089	4.67687	4.23509	4																													1089	23.784	33.4938	4	1089	7.59143	5.20816	3	1089	6.19551	2.80023	3
		1090	4.36615	4.1651	4																													1090	24.0659	33.2288	4	1090	7.85733	5.75859	3	1090	6.24487	2.48533	3
		1091	4.34775	3.76738	4																													1091	24.2277	34.3441	4	1091	8.03058	6.00548	3	1091	6.25858	2.7836	3
		1092	4.38839	4.57182	4																													1092	24.6248	34.1432	4	1092	8.08775	5.86096	3	1092	6.14488	3.03075	3
		1093	4.2344	4.21953	4																													1093	24.9472	32.0071	4	1093	8.22346	5.6447	3	1093	6.16995	2.525	3
		1094	3.82597	3.89179	4																													1094	24.8256	30.7509	4	1094	8.27639	5.51209	3	1094	6.29648	2.4349	3
		1095	3.86253	4.3117	4																													1095	25.3094	28.8919	4	1095	8.24064	4.34168	3	1095	6.23261	2.82483	3
		1096	3.76736	4.4453	4																													1096	25.7722	27.2089	4	1096	8.31604	4.7695	3	1096	6.1208	2.49532	3
		1097	3.66247	4.60659	4																													1097	25.7563	25.0398	4	1097	8.18504	3.70269	3	1097	6.10103	1.48498	3
		1098	3.61749	3.93465	4																													1098	25.6984	21.8973	4	1098	8.25397	3.64921	3	1098	6.23302	2.00324	3
		1099	3.54996	3.43287	4																													1099	25.6491	21.5631	4	1099	8.40886	3.77348	3	1099	6.20677	2.92903	3
		1100	3.47269	3.63521	4																													1100	25.8047	21.5638	4	1100	8.35195	5.07193	3	1100	6.10547	1.59236	3
		1101	3.33187	4.00841	4																													1101	26.2651	21.1875	4	1101	8.48882	4.90385	3	1101	6.18249	1.99867	3
		1102	3.23698	4.0112	4																													1102	26.631	24.2546	4	1102	8.58937	5.86246	3	1102	5.84182	2.19069	3
		1103	3.17976	3.86175	4																													1103	26.8818	26.1229	4	1103	8.72231	6.97901	4	1103	5.86835	2.48686	3
		1104	2.97418	3.0259	4																													1104	26.9646	23.725	4	1104	8.87129	7.36149	4	1104	5.80496	2.46591	3
		1105	2.8661	1.90199	4																													1105	26.9849	23.4947	4	1105	8.99596	7.62541	4	1105	5.85252	2.07199	3
		1106	2.86604	2.10344	4																													1106	26.8088	21.672	4	1106	9.0873	9.38881	4	1106	5.97952	1.54617	3
		1107	2.76373	2.12717	4																													1107	26.9892	23.4322	4	1107	9.14797	9.97633	4	1107	5.91866	2.0064	3
		1108	2.81881	1.63188	4																													1108	26.9096	23.5465	4	1108	9.27418	9.41242	4	1108	5.89879	2.51009	3
		1109	2.82522	1.9886	4																													1109	27.0501	23.0607	4	1109	9.13836	9.36212	4	1109	5.81482	2.47931	3
		1110	2.94817	3.94351	4																													1110	27.2499	22.9335	4	1110	9.09874	8.00533	4	1110	5.77887	1.83002	3
		1111	3.32259	4.28507	4																													1111	27.2624	22.8482	4	1111	9.11809	6.23127	4	1111	5.82305	1.83683	3
		1112	3.19385	3.73504	4																													1112	27.1394	22.9814	4	1112	9.07476	6.72713	4	1112	5.62837	1.97242	3
		1113	3.20222	3.37422	4																													1113	27.0444	22.8829	4	1113	8.94495	7.33237	4	1113	5.62069	2.09623	3
		1114	3.24884	3.51575	4																													1114	26.9626	19.9387	4	1114	9.00138	6.51861	4	1114	5.53428	2.80566	3
		1115	3.21321	3.19103	4																													1115	26.9319	20.8942	4	1115	8.90125	6.52533	4	1115	5.38136	2.72808	3
		1116	3.28809	3.44245	4																													1116	26.7816	26.4173	4	1116	8.78478	6.91147	4	1116	5.35413	2.72296	3
		1117	3.40477	2.61185	4																													1117	26.7579	29.3683	4	1117	8.90842	6.87486	4	1117	5.39687	2.81101	3
		1118	3.3399	2.67876	4																													1118	26.754	29.1227	4	1118	8.95696	7.60039	4	1118	5.66097	2.97787	3
		1119	3.14202	2.56039	4																													1119	26.9854	30.65	4	1119	9.00637	8.18342	4	1119	5.78491	2.62438	3
		1120	3.26688	1.99859	4																													1120	27.0208	31.6999	4	1120	8.8664	8.29307	4	1120	6.01472	2.54903	3
		1121	3.04731	1.15472	4																													1121	26.9987	31.0412	4	1121	8.79677	7.62303	4	1121	6.27876	2.31703	3
		1122	2.87341	1.32683	4																													1122	26.9369	26.3483	4	1122	8.8294	7.94741	4	1122	6.09711	1.9461	3
		1123	2.94923	2.23821	4																													1123	26.8201	25.4153	4	1123	8.82488	8.08072	4	1123	6.4504	1.10003	3
		1124	2.79234	2.51795	4																													1124	26.8461	24.2595	4	1124	8.73915	8.56084	4	1124	6.5667	2.17366	3
		1125	2.70663	2.80449	4																													1125	26.9091	27.0792	4	1125	8.79235	8.35809	4	1125	6.44821	1.90041	3
		1126	2.90577	3.1198	4																													1126	27.026	27.5378	4	1126	8.76942	8.3427	4	1126	6.54867	1.90893	3
		1127	2.83614	4.11577	4																													1127	27.0832	26.2833	4	1127	8.6808	7.94439	4	1127	6.41443	2.00937	3
		1128	2.66298	4.87633	4																													1128	27.2982	24.0132	4	1128	8.65798	7.3354	4	1128	6.45411	1.075	3
		1129	2.62407	4.46041	4																													1129	27.4031	25.332	4	1129	8.61016	7.09354	4	1129	6.69169	1.3461	3
		1130	2.73716	4.2831	4																													1130	27.4674	27.1166	4	1130	8.69743	7.22668	4	1130	6.45156	1.12831	3
		1131	2.67026	4.05473	4																													1131	27.7028	27.6468	4	1131	8.8079	7.2047	4	1131	6.3363	1.03459	3
		1132	2.35516	3.49444	4																													1132	27.7206	33.0332	4	1132	8.58223	6.99075	4	1132	6.26555	1.01392	3
		1133	2.37402	3.845	4																													1133	27.8368	33.8602	4	1133	8.60657	7.32629	4	1133	6.2552	1.30516	3
		1134	2.09858	3.87516	4																													1134	27.9161	34.2776	4	1134	8.75413	6.23151	4	1134	6.02742	2.12516	3
		1135	1.87808	3.12438	4																													1135	27.848	36.9059	4	1135	8.75623	5.95702	4	1135	5.89561	1.59795	3
		1136	1.79878	3.35348	4																													1136	27.7598	40.2359	4	1136	8.81305	6.85765	4	1136	5.98877	3.27844	3
		1137	1.81161	2.33778	4																													1137	27.8206	43.1728	4	1137	8.92645	6.06604	4	1137	6.10944	3.24699	3
		1138	1.92155	1.70323	4																													1138	27.7213	46.1116	4	1138	8.87752	4.90116	4	1138	6.19522	3.5866	3
		1139	1.85591	1.78086	4																													1139	27.8321	49.0139	4	1139	8.68214	3.82081	4	1139	6.1675	3.52435	3
		1140	1.77227	1.38845	4																													1140	27.8013	41.1258	4	1140	8.75074	4.42756	4	1140	6.14414	3.30847	3
		1141	1.94185	1.02976	4																													1141	27.8691	39.4234	4	1141	8.81515	4.29228	4	1141	6.10841	3.09383	3
		1142	2.26923	2.09149	4																													1142	27.8295	37.6906	4	1142	8.51198	4.19008	4	1142	6.09104	2.20074	3
		1143	2.60999	2.5985	4																													1143	27.7423	37.435	4	1143	8.82195	4.73738	4	1143	6.13271	2.59836	3
		1144	2.73352	2.46147	4																													1144	27.5696	35.31	4	1144	8.74067	5.43965	4	1144	6.02975	2.92701	3
		1145	2.74036	2.44256	4																													1145	27.4924	32.0786	4	1145	9.036	5.20774	4	1145	6.07317	2.53631	3
		1146	2.96928	2.43364	4																													1146	27.4065	31.8637	4	1146	9.02306	4.6165	4	1146	5.6105	2.59091	3
		1147	3.02283	2.65755	4																													1147	27.2069	33.4526	4	1147	8.79843	4.59148	4	1147	5.59069	4.05622	3
		1148	3.36681	2.4471	4																													1148	27.0082	33.1653	4	1148	8.94809	5.1851	4	1148	5.73803	3.61988	3
		1149	3.37221	3.30084	4																													1149	26.8904	35.63	4	1149	8.99234	4.83337	4	1149	5.8624	3.94756	3
		1150	3.33749	3.71181	4																													1150	26.8208	36.7766	4	1150	8.75022	4.08837	4	1150	5.84597	3.96537	3
		1151	3.39619	4.05685	4																													1151	26.7295	35.0497	4	1151	8.95757	4.38702	4	1151	5.88629	3.57439	3
		1152	3.43229	2.3098	4																													1152	26.5729	34.4794	4	1152	8.95455	4.80836	3	1152	5.80099	4.13367	3
		1153	3.64706	1.72227	4																													1153	26.4994	37.1934	4	1153	9.07652	4.57633	3	1153	5.84265	4.65875	3
		1154	3.82214	1.72583	4																													1154	26.2734	37.5058	4	1154	9.11718	4.0883	3	1154	5.8772	4.46679	3
		1155	3.4508	2.0428	4																													1155	26.0178	38.2332	4	1155	9.0728	4.76363	3	1155	5.91729	5.26046	3
		1156	3.53598	2.12387	4																													1156	25.7948	40.0606	4	1156	9.10583	5.41235	3	1156	5.76597	5.86928	3
		1157	3.52312	3.68939	4																													1157	25.5414	39.0703	4	1157	9.22884	5.81825	3	1157	5.449	5.84225	3
		1158	3.6395	3.99964	4																													1158	25.2361	39.1875	4	1158	9.40001	5.94872	3	1158	5.59435	5.35339	3
		1159	3.68257	2.88391	4																													1159	24.9867	38.7979	4	1159	9.45351	4.95736	3	1159	5.62656	5.24233	3
		1160	3.97617	2.02931	4																													1160	24.836	38.4986	4	1160	9.41987	5.07499	3	1160	5.64096	5.89893	3
		1161	3.77729	2.48983	4																													1161	24.8818	37.3773	4	1161	9.3877	4.98385	3	1161	5.73398	6.11449	3
		1162	3.92419	2.49025	4																													1162	24.9602	35.448	4	1162	9.30145	5.49432	3	1162	5.76799	6.33101	3
		1163	3.93925	2.01645	4																													1163	24.8662	33.4567	4	1163	9.51501	6.12945	3	1163	5.77551	6.57733	3
		1164	3.7951	2.54978	4																													1164	24.7936	32.4705	4	1164	9.60891	6.35456	3	1164	5.78854	6.9096	3
		1165	3.95287	3.37041	4																													1165	24.8365	32.5922	4	1165	9.49621	4.99571	3	1165	5.80062	7.01828	3
		1166	4.14674	2.81481	4																													1166	24.845	32.4327	4	1166	9.41285	5.55346	3	1166	5.81038	6.92329	3
		1167	4.30975	1.70282	4																													1167	24.8041	32.8795	4	1167	9.307	5.41335	3	1167	5.81617	7.10282	3
		1168	4.24535	1.80926	4																													1168	24.7832	34.5487	4	1168	9.20137	6.19643	3	1168	5.68835	7.59392	3
		1169	4.22895	2.39158	4																													1169	24.9377	35.1366	4	1169	9.19633	6.4476	3	1169	5.77363	6.72516	3
		1170	4.29235	2.04897	4																													1170	25.1421	35.3993	4	1170	9.12581	6.23235	3	1170	5.85699	7.84273	3
		1171	4.32761	2.2746	4																													1171	25.1667	34.9449	4	1171	9.13417	6.97934	3	1171	5.92385	7.1713	3
		1172	4.28699	3.68577	4																													1172	25.1418	34.0063	4	1172	9.24162	7.09055	3	1172	5.93909	7.50556	3
		1173	4.25385	2.90468	4																													1173	25.1918	33.5211	4	1173	9.21562	6.82083	3	1173	6.09338	7.11355	3
		1174	4.26756	1.73202	4																													1174	25.2583	34.6859	4	1174	9.17814	7.38184	3	1174	6.27197	7.08635	3
		1175	4.26786	3.27805	4																													1175	25.2273	33.145	4	1175	9.26216	7.59663	3	1175	6.09991	7.27948	3
		1176	4.3568	3.67699	4																													1176	25.2325	33.7329	4	1176	9.46088	7.23817	3	1176	6.05709	6.85113	3
		1177	4.2231	4.17043	4																													1177	25.4599	33.5795	4	1177	9.46763	7.28387	3	1177	6.15902	6.58998	3
		1178	4.20462	3.0974	4																													1178	25.5181	33.226	4	1178	9.47133	6.485	3	1178	6.15987	6.10717	3
		1179	4.12579	3.38744	4																													1179	25.4928	30.7594	4	1179	9.46764	6.64152	4	1179	6.30882	5.65986	3
		1180	4.25211	3.65636	4																													1180	25.6772	27.1754	4	1180	9.55614	6.81536	4	1180	6.23751	4.81408	3
		1181	4.48564	2.91707	4																													1181	25.6915	23.9181	4	1181	9.65675	6.41425	4	1181	6.25947	4.8073	3
		1182	4.25768	2.34247	4																													1182	25.5936	22.8823	4	1182	9.54474	6.00897	4	1182	6.54227	5.12001	3
		1183	4.09505	2.10272	4																													1183	25.7252	23.092	4	1183	9.47872	6.72456	4	1183	6.52813	5.2629	3
		1184	3.86108	2.39237	4																													1184	25.7263	23.0018	4	1184	9.53649	5.548	4	1184	6.496	5.50597	3
		1185	3.97864	2.33074	4																													1185	25.6228	23.1176	4	1185	9.9217	5.06522	4	1185	6.41737	5.40155	3
		1186	3.59385	1.24311	4																													1186	25.5432	23.3168	4	1186	9.75349	4.74239	4	1186	6.50958	5.97238	3
		1187	3.48331	0.961519	4																													1187	25.4745	21.9757	4	1187	9.29292	4.72626	4	1187	6.57912	5.83701	3
		1188	3.58152	0.707528	4																													1188	25.2137	21.1438	4	1188	9.36098	5.20529	4	1188	6.57463	5.50413	3
		1189	3.68174	0.841995	4																													1189	25.1883	19.7942	4	1189	9.42419	5.21418	4	1189	6.6096	5.90201	3
		1190	3.53851	1.0216	4																													1190	24.8994	21.2284	4	1190	9.43547	5.2346	4	1190	6.88731	7.11038	3
		1191	3.16263	1.40501	4																													1191	24.9534	22.135	4	1191	9.52595	5.78926	4	1191	7.25847	7.14527	3
		1192	3.25626	1.83371	4																													1192	25.1863	22.2538	4	1192	9.71032	6.57941	4	1192	7.40762	7.23404	3
		1193	3.29422	1.93018	4																													1193	25.3007	22.7951	4	1193	9.68298	6.28341	4	1193	7.497	7.90518	3
		1194	3.39541	2.03992	4																													1194	25.3413	22.9569	4	1194	9.80365	6.35566	4	1194	7.39118	7.64223	3
		1195	3.25857	1.52359	4																													1195	25.4371	21.1928	4	1195	10.05	5.89585	4	1195	7.53377	8.19108	3
		1196	3.36595	1.34474	4																													1196	25.2429	25.4846	4	1196	10.0726	5.05804	4	1196	7.65221	8.368	3
		1197	3.41521	2.20142	4																													1197	24.6303	28.19	4	1197	10.2018	4.99288	4	1197	7.70463	8.46708	3
		1198	3.83387	1.0877	4																													1198	24.4473	28.3926	4	1198	10.2293	4.99177	4	1198	7.7936	7.77715	3
		1199	3.58561	1.24299	4																													1199	24.4644	28.4996	4	1199	10.1784	5.49294	4	1199	7.87653	8.37091	3
		1200	3.79102	0.994241	4																													1200	24.4912	28.17	4	1200	10.2153	6.16588	4	1200	7.88839	7.72375	3
		1201	3.85593	1.67385	4																													1201	24.5631	28.1086	4	1201	10.18	5.78027	4	1201	8.03534	6.71469	3
		1202	4.33414	1.85746	4																													1202	24.4006	30.6095	4	1202	10.1548	5.53241	4	1202	7.68185	6.23607	3
		1203	4.22479	2.65689	4																													1203	24.257	31.5793	4	1203	10.1042	5.76625	4	1203	7.54769	5.81287	3
		1204	4.17739	1.99417	4																													1204	24.2404	30.7068	4	1204	10.2902	5.5952	4	1204	7.53913	5.08396	3
		1205	4.16422	2.64839	4																													1205	23.9571	29.1482	4	1205	10.3099	4.24626	4	1205	7.3507	5.49924	3
		1206	4.27318	3.36004	4																													1206	23.6569	29.1868	4	1206	10.2811	3.35708	4	1206	7.10524	5.66531	3
		1207	4.2326	2.29547	4																													1207	23.4198	27.4837	4	1207	10.2049	4.0374	4	1207	7.07926	5.40491	3
		1208	4.14507	1.88812	4																													1208	23.1352	27.9579	4	1208	10.1931	3.58622	4	1208	7.13652	5.15445	3
		1209	3.90025	1.39458	4																													1209	22.9872	29.5773	4	1209	10.1606	4.04482	4	1209	7.10737	4.94658	3
		1210	3.93073	1.09398	4																													1210	22.8662	30.3221	4	1210	10.0929	3.09594	4	1210	6.90586	4.66572	3
		1211	3.96576	1.15002	4																													1211	22.7305	30.5992	4	1211	10.0106	6.30351	4	1211	6.92005	4.37831	3
		1212	4.20229	1.8677	4																													1212	22.7977	30.4887	4	1212	9.92726	6.80979	4	1212	6.97059	4.55599	3
		1213	4.58564	1.19329	4																													1213	23.125	27.4963	4	1213	9.90351	6.90234	4	1213	7.07087	4.7097	3
		1214	4.83793	0.939519	4																													1214	23.2765	27.6553	4	1214	9.90675	6.59854	4	1214	7.01105	4.58504	3
		1215	5.10555	0.753309	4																													1215	23.3856	27.8245	4	1215	9.88514	6.53241	4	1215	7.016	4.80705	3
		1216	5.52121	0.599625	4																													1216	23.5749	27.4648	4	1216	10.0188	6.45867	4	1216	6.98769	4.85095	3
		1217	5.55207	1.09107	4																													1217	23.4178	28.0883	4	1217	10.0571	6.63952	4	1217	7.03186	4.70274	3
		1218	5.60562	1.81113	4																													1218	23.3436	29.0651	4	1218	10.0981	7.22432	4	1218	7.11325	4.64451	3
		1219	5.81086	2.13647	4																													1219	23.2944	29.7863	4	1219	10.1014	7.64218	4	1219	7.39116	5.42168	3
		1220	5.62111	1.7683	4																													1220	23.1355	29.6014	4	1220	10.1545	8.53285	4	1220	7.42073	5.95515	3
		1221	5.80043	1.54792	4																													1221	23.088	28.4244	4	1221	10.1455	8.08337	4	1221	7.38209	6.07744	3
		1222	5.98396	2.16308	4																													1222	23.0728	29.5723	4	1222	10.196	8.39394	4	1222	7.3107	6.1858	3
		1223	5.92386	1.06653	4																													1223	22.9494	30.5341	4	1223	10.1891	9.12986	4	1223	7.33737	6.36208	3
		1224	6.06465	1.05034	4																													1224	22.9162	30.6234	4	1224	10.3086	8.46142	4	1224	7.28587	7.08603	3
		1225	5.87247	1.40847	4																													1225	22.7977	29.2033	4	1225	10.3918	8.40767	4	1225	7.16615	7.29148	3
		1226	5.99756	1.70006	4																													1226	22.7159	29.4906	4	1226	10.4025	8.12142	4	1226	7.24398	7.42843	3
		1227	5.70398	1.17775	4																													1227	22.7048	29.4382	4	1227	10.3695	8.23908	4	1227	7.22616	7.51303	3
		1228	5.66425	1.74845	4																													1228	22.6135	30.1667	4	1228	10.409	8.70436	4	1228	7.12601	7.64809	3
		1229	5.58432	2.5201	4																													1229	22.5771	30.6049	4	1229	10.3507	9.01707	4	1229	7.05489	7.87403	3
		1230	5.55925	1.90801	4																													1230	22.5904	32.4389	4	1230	10.3667	7.66103	4	1230	6.91336	8.37533	3
		1231	5.52353	1.69345	4																													1231	22.7702	33.0107	4	1231	10.3494	8.68534	4	1231	7.0012	8.51611	3
		1232	5.06309	1.83177	4																													1232	22.896	32.643	4	1232	10.3024	9.21879	4	1232	7.05278	8.4369	3
		1233	4.70609	1.51263	4																													1233	22.7296	30.6518	4	1233	10.2944	7.90184	4	1233	7.17538	7.73259	3
		1234	3.97514	1.05636	4																													1234	22.5364	28.9572	4	1234	10.24	7.51785	4	1234	7.12553	7.68364	3
		1235	4.03088	0.995715	4																													1235	22.4792	27.4154	4	1235	10.2418	7.2009	4	1235	6.88588	8.03231	3
		1236	3.34565	1.1997	4																													1236	22.4278	26.6663	4	1236	10.2499	6.86724	4	1236	6.54888	8.27615	3
		1237	3.2922	1.00977	4																													1237	22.4904	28.696	4	1237	10.3864	6.61781	4	1237	6.51418	8.10006	3
		1238	3.23978	1.34486	4																													1238	22.6887	29.8955	4	1238	10.2062	6.08613	4	1238	6.57549	7.53277	3
		1239	3.33018	0.920164	4																													1239	22.676	28.6957	4	1239	10.2937	5.74819	4	1239	6.57193	7.96581	3
		1240	3.08912	1.01208	4																													1240	22.4816	27.1444	4	1240	10.4926	6.44752	4	1240	6.81171	8.58851	3
		1241	2.91878	1.01824	4																													1241	22.1604	25.076	4	1241	10.5665	6.08866	4	1241	6.87951	8.57322	3
		1242	3.24526	0.725908	4																													1242	21.9072	24.2728	4	1242	10.6875	5.02131	4	1242	6.99028	8.81966	3
		1243	3.0462	0.98738	4																													1243	21.7353	24.2771	4	1243	10.5547	5.59143	4	1243	7.04538	8.38858	3
		1244	2.97123	0.754828	4																													1244	21.6192	22.9857	4	1244	10.5095	5.43758	4	1244	7.15939	7.80268	3
		1245	2.77151	0.842848	4																													1245	21.7736	24.1121	4	1245	10.511	5.23012	4	1245	7.34491	7.97061	3
		1246	2.52985	1.04794	4																													1246	21.9046	23.9326	4	1246	10.6351	5.79984	4	1246	7.65663	8.13502	3
		1247	2.81681	1.11824	4																													1247	22.0573	22.1113	4	1247	10.5796	5.28482	4	1247	7.57966	8.75222	3
		1248	2.5447	0.810972	4																													1248	21.9197	21.0113	4	1248	10.701	5.22926	4	1248	7.5498	9.11261	3
		1249	2.55757	0.62083	4																													1249	21.9339	20.6765	4	1249	10.8329	5.18541	4	1249	7.64856	8.79271	3
		1250	3.00126	0.723026	4																													1250	21.754	19.3322	4	1250	10.8666	6.22879	4	1250	7.66196	8.66735	3
		1251	2.60077	1.22057	4																													1251	21.6387	18.3207	4	1251	10.9461	6.69077	4	1251	7.62047	8.43632	3
		1252	2.14821	0.782253	4																													1252	21.3676	18.3317	4	1252	10.9381	6.64206	4	1252	7.73596	8.8103	3
		1253	2.24426	0.866251	4																													1253	21.0572	19.001	4	1253	11.1184	6.33067	4	1253	7.88	8.89155	3
		1254	2.36852	0.8642	4																													1254	20.9472	19.0439	4	1254	11.1731	5.77033	4	1254	7.47418	9.03713	3
		1255	2.4622	0.760929	4																													1255	20.8135	21.4524	4	1255	11.0731	5.39472	4	1255	7.08516	9.15902	3
		1256	2.3011	0.620459	4																													1256	20.342	22.3587	4	1256	11.1066	5.41506	4	1256	6.48333	8.50583	3
		1257	2.59315	0.265264	4																													1257	20.1906	23.5145	4	1257	10.9663	4.80005	4	1257	6.55558	7.79109	3
		1258	2.68509	0.188734	4																													1258	20.1507	22.9419	4	1258	11.1594	4.17683	4	1258	6.60828	8.05996	3
		1259	2.56906	0.204178	4																													1259	20.0175	23.187	4	1259	11.0569	3.90319	4	1259	6.62795	8.03287	3
		1260	2.71826	0.513173	4																													1260	19.8469	24.0872	4	1260	11.0305	3.60221	4	1260	6.74529	8.32695	3
		1261	2.4658	0.241538	4																													1261	19.7475	21.8717	4	1261	11.177	3.26173	4	1261	6.76167	8.71699	3
		1262	3.06976	0.97464	4																													1262	19.5263	22.6127	4	1262	10.826	2.80345	4	1262	6.75845	8.90981	3
		1263	2.98649	0.938023	4																													1263	19.3694	21.9791	4	1263	10.8966	2.66859	4	1263	6.69026	9.25804	3
		1264	2.87935	0.454075	4																													1264	19.2587	21.8376	4	1264	10.8473	2.26201	4	1264	6.78501	8.78772	3
		1265	3.04377	0.84632	4																													1265	19.3989	22.3857	4	1265	10.8398	2.29392	4	1265	6.73518	9.25619	3
		1266	3.54147	0.655625	4																													1266	19.3719	24.3304	4	1266	10.9376	2.07169	4	1266	6.75808	7.76497	3
		1267	3.73103	0.661549	4																													1267	19.4483	24.7609	4	1267	10.8599	1.29193	4	1267	6.6998	6.57675	3
		1268	3.87851	0.570099	4																													1268	19.6712	24.6038	4	1268	10.7757	1.19676	4	1268	6.7209	7.14793	3
		1269	4.09312	0.675711	4																													1269	19.8056	25.7324	4	1269	10.8589	0.712247	4	1269	6.50978	7.17166	3
		1270	4.02495	0.355011	4																													1270	19.7654	26.7382	4	1270	10.8201	1.35667	4	1270	6.39679	7.14477	3
		1271	3.84623	0.524672	4																													1271	19.6416	28.2039	4	1271	10.7521	3.23372	4	1271	6.24734	6.93971	3
		1272	3.83743	0.657947	4																													1272	19.6059	28.2723	4	1272	10.8904	4.84372	4	1272	6.16542	7.25132	3
		1273	3.92001	0.436644	4																													1273	19.6779	26.7529	4	1273	10.7319	7.1026	4	1273	6.64661	6.34754	3
		1274	3.79285	0.210871	4																													1274	19.624	26.2391	4	1274	10.8586	8.74138	4	1274	6.81548	6.31924	3
		1275	3.72242	0.292377	4																													1275	19.598	28.1373	4	1275	10.9905	9.31499	4	1275	6.77277	7.60841	3
		1276	3.62398	0.246666	4																													1276	19.5701	33.4847	4	1276	11.1308	9.67752	4	1276	6.68893	7.10909	3
		1277	3.54534	0.144912	4																													1277	19.4116	35.537	4	1277	11.0768	9.6959	4	1277	6.75736	6.71849	3
																																		1278	19.3177	31.806	4	1278	11.1205	9.28631	4	1278	6.63563	5.45832	3
																																		1279	19.2943	32.127	4	1279	11.3048	9.57026	4	1279	6.39299	5.352	3
																																		1280	19.1503	32.7813	4	1280	11.5077	8.74471	4	1280	6.12603	5.27708	3
																																		1281	19.1926	33.3045	4	1281	11.4975	7.93755	4	1281	6.16223	5.39094	3
																																		1282	19.1791	32.8732	4	1282	11.431	7.17408	4	1282	6.16087	4.24265	3
																																		1283	19.4	33.9742	4	1283	11.4966	7.77337	4	1283	6.1386	2.68648	3
																																		1284	19.4283	36.7218	4	1284	11.6202	6.16187	4	1284	6.15026	2.23479	3
																																		1285	19.3349	38.0741	4	1285	11.5298	6.30275	4	1285	6.12808	2.48109	3
																																		1286	19.4588	38.6272	4	1286	11.5629	6.42853	4	1286	5.98969	2.67116	3
																																		1287	19.3667	38.6211	4	1287	11.4522	7.10625	4	1287	5.89215	2.52334	3
																																		1288	19.4362	37.8403	4	1288	11.2825	7.80547	4	1288	5.96164	2.04562	3
																																		1289	19.275	36.6889	4	1289	11.2916	7.40137	4	1289	5.96635	1.89932	3
																																		1290	19.1211	37.659	4	1290	11.1944	5.71015	4	1290	5.93159	1.47931	3
																																		1291	19.1997	37.7394	4	1291	11.0165	5.07062	4	1291	5.80056	1.77858	3
																																		1292	19.1522	37.8692	4	1292	10.9139	5.12126	4	1292	5.86451	1.8844	3
																																		1293	19.1709	38.0332	4	1293	10.7846	5.14234	4	1293	5.82394	2.84745	3
																																		1294	19.0722	37.6082	4	1294	10.7559	4.76749	4	1294	5.74948	4.06585	3
																																		1295	19.0863	36.607	4	1295	10.6924	4.70361	4	1295	5.8333	3.917	3
																																		1296	19.0073	35.222	4	1296	10.302	4.60199	4	1296	6.05221	4.08171	3
																																		1297	18.8615	33.9415	4	1297	10.1726	5.30118	4	1297	6.25422	4.39793	3
																																		1298	18.8092	34.1889	4	1298	9.96327	5.58808	4	1298	6.35052	4.0042	3
																																		1299	18.7578	33.5506	4	1299	10.0783	4.82298	4	1299	6.36416	4.26462	3
																																		1300	18.6953	32.4728	4	1300	10.0316	5.10225	4	1300	6.48706	4.5898	3
																																		1301	18.8105	30.5155	4	1301	10.2911	5.24133	4	1301	6.65359	4.57599	3
																																		1302	18.7846	30.0458	4	1302	10.0722	5.0136	4	1302	6.70871	3.75281	3
																																		1303	18.9205	30.9852	4	1303	10.3747	5.46004	4	1303	6.7723	3.6644	3
																																		1304	18.8551	30.0322	4	1304	10.7639	5.20691	4	1304	7.10069	4.26052	3
																																		1305	18.8255	28.4257	4	1305	10.9669	5.03631	4	1305	7.36277	4.73927	3
																																		1306	18.7128	28.0628	4	1306	11.1981	4.30249	4	1306	7.4192	5.30113	3
																																		1307	18.7174	27.4179	4	1307	11.3874	4.13628	4	1307	7.27942	4.62692	3
																																		1308	18.8475	27.0665	4	1308	11.5408	5.84009	4	1308	7.14278	3.38849	3
																																		1309	18.7308	27.8807	4	1309	11.3254	7.45024	4	1309	7.11229	1.33234	3
																																		1310	18.7081	29.2551	4	1310	11.4107	7.80696	4	1310	6.95404	1.57317	3
																																		1311	18.5516	29.6333	4	1311	11.6332	7.36841	4	1311	6.95101	3.25015	3
																																		1312	18.5808	28.559	4	1312	11.7408	7.9696	4	1312	6.97404	4.75837	3
																																		1313	18.5095	29.2498	4	1313	11.7916	6.28	4	1313	6.99131	4.36641	3
																																		1314	18.5524	29.5591	4	1314	11.9699	5.41126	4	1314	7.02054	3.61255	3
																																		1315	18.5427	28.0979	4	1315	11.9252	5.58767	4	1315	6.86393	2.67374	3
																																		1316	18.7161	28.6586	4	1316	11.9363	5.65699	4	1316	6.84928	2.49001	3
																																		1317	18.7126	28.5429	4	1317	11.9955	5.34262	4	1317	6.8393	2.92891	3
																																		1318	18.6569	27.7237	4	1318	12.0268	6.13136	4	1318	6.74051	4.63172	3
																																		1319	18.6383	28.3032	4	1319	12.0199	5.89499	4	1319	6.72993	4.33195	3
																																		1320	18.6224	28.3277	4	1320	12.0632	7.05213	4	1320	6.72437	4.10796	3
																																		1321	18.8364	26.8201	4	1321	12.2033	6.00659	4	1321	6.65476	4.80389	3
																																		1322	18.7801	27.7171	4	1322	12.2805	8.40736	4	1322	6.64945	4.88012	3
																																		1323	18.7649	29.5171	4	1323	12.4048	7.01692	4	1323	6.63709	4.28794	3
																																		1324	18.9093	30.9012	4	1324	12.5063	5.36824	4	1324	6.69216	4.54707	3
																																		1325	19.1827	29.713	4	1325	12.6572	5.44952	4	1325	6.70113	4.33186	3
																																		1326	19.4238	31.0035	4	1326	12.7979	6.47071	4	1326	6.7005	5.5309	3
																																		1327	19.3787	30.6303	4	1327	12.8461	7.27755	4	1327	6.69196	5.04611	3
																																		1328	19.2477	30.9564	4	1328	12.8358	6.55032	4	1328	6.66417	3.55534	3
																																		1329	19.434	31.8881	4	1329	12.8426	5.97519	4	1329	6.64567	3.31824	3
																																		1330	19.5759	31.5708	4	1330	12.8291	6.02427	4	1330	6.57909	3.22847	3
																																		1331	19.6015	31.8156	4	1331	12.6864	4.86368	4	1331	6.56216	2.16228	3
																																		1332	19.6027	31.5054	4	1332	12.4276	5.23369	4	1332	6.49838	1.72635	3
																																		1333	19.6333	31.2707	4	1333	12.3807	8.30766	4	1333	6.52201	2.72548	3
																																		1334	19.7912	30.9214	4	1334	12.2813	8.22225	4	1334	6.48696	3.49034	3
																																		1335	19.6777	30.6563	4	1335	12.3032	8.17227	4	1335	6.43597	4.14999	3
																																		1336	19.6285	29.8404	4	1336	11.9749	8.25229	4	1336	6.39162	5.16164	3
																																		1337	19.7349	29.7523	4	1337	11.8132	8.29609	4	1337	6.35772	5.6695	3
																																		1338	19.5976	30.3018	4	1338	11.6988	8.08939	4	1338	6.36039	6.12812	3
																																		1339	19.5906	29.8022	4	1339	11.5316	8.43459	4	1339	6.33009	6.47761	3
																																		1340	19.6776	29.5062	4	1340	11.2132	8.03131	4	1340	6.10138	7.34016	3
																																		1341	19.6368	28.9576	4	1341	11.2397	5.76801	4	1341	5.80471	7.88674	3
																																		1342	19.6744	29.5206	4	1342	11.3851	7.41129	4	1342	5.55576	7.25855	3
																																		1343	19.8149	30.1259	4	1343	11.3245	7.95102	4	1343	5.50001	6.30091	3
																																		1344	19.7688	29.2725	4	1344	11.0716	7.26082	4	1344	5.66854	4.90827	3
																																		1345	19.4745	28.6016	4	1345	11.1088	5.13151	4	1345	5.88477	3.12971	3
																																		1346	19.3661	28.9125	4	1346	11.1276	4.63082	4	1346	5.95516	4.77186	3
																																		1347	19.3652	29.5427	4	1347	11.1014	6.77622	4	1347	6.02182	5.61386	3
																																		1348	19.3021	29.3003	4	1348	10.9935	6.65687	4	1348	6.02051	5.74641	3
																																		1349	19.4946	29.2606	4	1349	10.7312	7.88553	4	1349	5.81898	5.60687	3
																																		1350	19.6083	29.6241	4	1350	10.5845	6.415	4	1350	5.71964	4.71022	3
																																		1351	19.4696	28.7258	4	1351	10.4886	4.11459	4	1351	5.8596	3.40702	3
																																		1352	19.4667	28.4844	4	1352	10.4152	4.54373	4	1352	5.99218	3.18564	3
																																		1353	19.4061	31.7741	4	1353	10.428	3.7491	4	1353	5.9877	3.34531	3
																																		1354	19.3219	33.3396	4	1354	10.3595	6.81022	4	1354	6.00418	3.90144	3
																																		1355	19.3979	34.7513	4	1355	10.4329	6.68419	4	1355	5.97751	3.89524	3
																																		1356	19.554	35.1541	4	1356	10.3863	7.44514	4	1356	5.91769	4.77533	3
																																		1357	19.4305	35.3484	4	1357	10.2147	7.14103	4	1357	5.85565	5.55532	3
																																		1358	19.262	33.6617	4	1358	10.0891	6.86807	4	1358	5.74672	5.30733	3
																																		1359	19.2439	29.8875	4	1359	10.0318	6.94126	4	1359	5.66391	5.00268	3
																																		1360	19.2661	28.8098	4	1360	9.9486	7.21613	4	1360	5.61232	4.27579	3
																																		1361	19.4233	29.5674	4	1361	9.79985	7.45329	4	1361	5.40519	4.03178	3
																																		1362	19.3434	30.0563	4	1362	9.63683	7.63462	4	1362	5.32534	3.21299	3
																																		1363	19.2476	29.6535	4	1363	9.59629	7.15623	4	1363	5.27713	3.40068	3
																																		1364	19.2829	28.8564	4	1364	9.52997	7.2839	4	1364	5.1635	3.56161	3
																																		1365	19.2587	32.7593	4	1365	9.57479	6.22393	4	1365	4.91416	3.4272	3
																																		1366	19.5325	35.1036	4	1366	9.46489	6.33805	4	1366	4.46135	3.37678	3
																																		1367	19.5331	35.319	4	1367	9.37322	6.8846	4	1367	4.29386	3.68118	3
																																		1368	19.3091	34.9629	4	1368	9.42135	7.33095	4	1368	4.22366	3.59725	3
																																		1369	19.4421	34.9966	4	1369	9.36731	6.58675	4	1369	4.26991	3.69411	3
																																		1370	19.5142	33.6998	4	1370	9.30096	6.68956	4	1370	4.31329	2.9747	3
																																		1371	19.6196	30.032	4	1371	9.25991	7.18254	4	1371	4.74696	3.16682	3
																																		1372	19.627	27.4452	4	1372	9.21941	6.67155	4	1372	5.19806	2.50235	3
																																		1373	19.8025	26.1383	4	1373	9.31524	6.67617	4	1373	5.59041	1.82563	3
																																		1374	19.8696	25.3004	4	1374	9.23393	5.99772	4	1374	5.77975	1.86566	3
																																		1375	19.909	24.199	4	1375	9.18701	6.7257	4	1375	6.06172	2.23652	3
																																		1376	20.0051	22.8049	4	1376	9.59429	6.76548	4	1376	6.53732	2.21211	3
																																		1377	19.9446	23.102	4	1377	9.82074	6.73881	4	1377	6.75774	2.73759	3
																																		1378	20.0036	25.6818	4	1378	9.6409	7.12105	4	1378	6.72277	3.38226	3
																																		1379	19.8896	25.4639	4	1379	9.6397	6.58391	4	1379	6.74358	4.6874	3
																																		1380	19.5907	24.7724	4	1380	9.61285	6.42361	4	1380	6.87864	4.27326	3
																																		1381	19.4243	25.4505	4	1381	9.65367	6.79878	3	1381	7.10492	3.66502	3
																																		1382	18.9976	27.39	4	1382	9.63069	5.37223	3	1382	6.93868	3.3935	3
																																		1383	19.2338	29.1059	4	1383	9.55581	5.89186	3	1383	6.79707	3.28822	3
																																		1384	19.1554	30.6328	4	1384	9.65912	5.2431	3	1384	6.84687	3.31658	3
																																		1385	19.1585	31.2403	4	1385	9.75768	5.37907	3	1385	6.85277	2.55704	3
																																		1386	19.0003	30.1565	4	1386	10.0438	4.1754	3	1386	6.75316	2.82091	3
																																		1387	18.9395	30.5943	4	1387	9.84658	4.01774	3	1387	6.66095	3.24068	3
																																		1388	18.8916	30.608	4	1388	9.8611	4.1953	3	1388	6.52561	3.07548	3
																																		1389	18.8561	29.7004	4	1389	9.9488	4.14016	3	1389	6.50618	2.77169	3
																																		1390	18.6761	29.6244	4	1390	10.0367	4.05934	3	1390	6.28602	1.7337	3
																																		1391	18.8151	31.8053	4	1391	10.1255	4.70016	3	1391	6.26984	1.81427	3
																																		1392	19.309	33.3128	4	1392	10.3423	3.81061	3	1392	6.1325	2.37703	3
																																		1393	18.1092	34.4697	4	1393	10.5019	3.32759	3	1393	6.25416	2.32691	3
																																		1394	17.3354	35.3414	4	1394	10.6514	4.66282	3	1394	6.35545	2.17356	3
																																		1395	16.5146	34.4738	4	1395	10.8134	4.95423	3	1395	6.28687	2.14937	3
																																		1396	16.1337	34.2524	4	1396	10.812	6.02771	3	1396	6.15366	1.88164	3
																																		1397	15.7343	32.1369	4	1397	10.823	5.87955	3	1397	6.25195	2.07066	3
																																		1398	15.6634	29.1124	4	1398	10.9673	4.26662	3	1398	6.22395	2.64167	3
																																		1399	15.8099	28.4126	4	1399	11.051	2.53698	3	1399	5.81818	2.61552	3
																																		1400	16.2088	26.8235	4	1400	11.0657	2.51721	3	1400	5.624	3.01841	3
																																		1401	16.7031	25.3093	4	1401	10.9909	1.52575	3	1401	5.42365	3.8607	3
																																		1402	17.554	22.916	4	1402	10.8969	0.578674	3	1402	5.50389	3.06231	3
																																		1403	18.2272	24.703	4	1403	10.8949	1.35852	3	1403	5.50219	2.69842	3
																																		1404	18.8568	25.0441	4	1404	10.8746	3.34403	3	1404	5.61845	2.75414	3
																																		1405	19.2664	26.2107	4	1405	10.8702	3.87203	3	1405	5.4968	3.56929	3
																																		1406	18.8101	27.3013	4	1406	10.9514	4.64239	3	1406	5.53078	3.58762	3
																																		1407	18.5414	29.9091	4	1407	10.8836	4.6806	3	1407	5.43223	3.36443	3
																																		1408	18.48	31.6645	4	1408	10.7844	3.83323	4	1408	5.41235	3.3238	3
																																		1409	18.4619	32.2293	4	1409	10.6889	3.23903	4	1409	5.71675	3.8893	3
																																		1410	18.0002	36.3453	4	1410	10.7775	3.57549	4	1410	5.70623	3.15745	3
																																		1411	18.0198	35.2046	4	1411	10.7715	4.00779	4	1411	5.68142	3.49341	3
																																		1412	18.3062	33.6614	4	1412	10.5961	4.4047	4	1412	5.75771	3.45033	3
																																		1413	18.0454	30.8705	4	1413	10.4792	4.76075	4	1413	5.63651	3.38953	3
																																		1414	17.8266	28.7149	4	1414	10.4796	4.90908	4	1414	5.62144	3.4037	3
																																		1415	17.7348	26.7794	4	1415	10.391	4.92581	4	1415	5.69133	3.29971	3
																																		1416	18.052	25.3107	4	1416	10.3796	4.97117	4	1416	5.52857	3.62943	3
																																		1417	17.9787	23.8462	4	1417	10.3316	5.2587	4	1417	5.54449	3.27945	3
																																		1418	18.1954	22.7753	4	1418	10.1685	5.11712	4	1418	5.63824	2.75256	3
																																		1419	18.2331	21.5583	4	1419	10.2874	4.84794	4	1419	5.72388	2.48151	3
																																		1420	18.119	20.5745	4	1420	10.1593	5.2654	4	1420	5.6178	2.64899	3
																																		1421	17.9745	21.9804	4	1421	10.403	4.74521	4	1421	5.76113	3.21871	3
																																		1422	17.937	23.2265	4	1422	10.3101	4.26102	4	1422	6.06465	3.7891	3
																																		1423	17.8069	23.2686	4	1423	10.4342	3.60482	4	1423	6.14719	3.9932	3
																																		1424	17.6544	23.1635	4	1424	10.4957	3.29377	4	1424	6.43372	3.52184	3
																																		1425	17.3795	22.1876	4	1425	10.429	3.37092	4	1425	6.61192	3.98287	3
																																		1426	17.1677	21.1482	4	1426	10.7119	3.68911	4	1426	6.81353	2.8946	3
																																		1427	17.1919	21.2831	4	1427	10.687	3.86282	4	1427	6.96024	2.52339	3
																																		1428	17.5206	22.0342	4	1428	10.4877	3.82815	4	1428	7.10516	2.33859	3
																																		1429	17.4629	21.4717	4	1429	10.4534	3.24238	4	1429	7.09171	3.35797	3
																																		1430	17.5553	20.7094	4	1430	10.559	2.92493	4	1430	7.33978	2.95569	3
																																		1431	16.6947	20.6784	4	1431	10.9228	3.00182	4	1431	7.34045	2.60718	3
																																		1432	16.1138	22.2101	4	1432	11.0416	2.73961	4	1432	7.36407	3.44087	3
																																		1433	15.7002	23.1668	4	1433	10.8332	1.62239	4	1433	7.51047	3.35448	3
																																		1434	15.3619	22.934	4	1434	10.7217	1.11974	4	1434	7.6416	2.66829	3
																																		1435	14.9279	23.5875	4	1435	10.7699	2.186	4	1435	7.9017	2.32536	3
																																		1436	15.0429	23.0675	4	1436	10.8075	4.92366	4	1436	8.00508	2.99457	3
																																		1437	14.7465	23.4079	4	1437	10.6912	7.07162	4	1437	8.09014	2.9962	3
																																		1438	14.7649	24.8679	4	1438	10.5636	6.4006	4	1438	8.09761	2.18442	3
																																		1439	15.1521	25.1625	4	1439	10.5667	6.15607	4	1439	8.064	2.41765	3
																																		1440	16.0334	25.2308	4	1440	10.3422	4.98156	4	1440	7.99803	2.84301	3
																																		1441	16.9617	26.3296	4	1441	10.1259	3.5669	4	1441	7.94664	4.11029	3
																																		1442	17.9621	27.7502	4	1442	10.0446	3.6951	4	1442	7.65451	4.08219	3
																																		1443	18.9205	27.7746	4	1443	9.94194	3.31976	4	1443	7.52579	4.00555	3
																																		1444	19.9228	27.0849	4	1444	9.875	4.76169	4	1444	7.55083	4.28769	3
																																		1445	20.9413	27.3466	4	1445	9.71834	6.32917	4	1445	7.60046	4.12889	3
																																		1446	21.5224	28.0909	4	1446	9.67586	6.86376	4	1446	7.73226	4.07586	3
																																		1447	21.3118	28.2728	4	1447	9.44892	6.35335	4	1447	7.71737	3.23678	3
																																		1448	21.4467	27.7501	4	1448	9.23899	6.01543	4	1448	7.08133	3.37474	3
																																		1449	21.179	29.0297	4	1449	9.12165	6.58102	4	1449	6.58609	3.36252	3
																																		1450	21.6826	28.6041	4	1450	9.06988	7.26327	4	1450	6.43739	4.22835	3
																																		1451	21.2146	28.0238	4	1451	8.92805	6.68564	4	1451	6.23337	4.3041	3
																																		1452	21.5284	27.1349	4	1452	8.8397	6.52577	4	1452	6.13221	3.38819	3
																																		1453	21.6131	26.2253	4	1453	8.77229	7.06317	4	1453	6.33806	3.20422	3
																																		1454	21.6294	26.5162	4	1454	8.71957	7.26896	4	1454	6.79754	3.4457	3
																																		1455	21.6208	27.4849	4	1455	8.65714	7.80101	4	1455	6.84906	3.15091	3
																																		1456	21.7232	24.8573	4	1456	8.84615	7.39501	4	1456	6.92067	3.74222	3
																																		1457	21.6588	23.9205	4	1457	8.7793	7.02928	4	1457	6.85335	4.31171	3
																																		1458	20.3241	24.8585	4	1458	8.57194	7.25659	4	1458	6.69912	5.55591	3
																																		1459	19.5137	25.0854	4	1459	8.61795	6.65755	4	1459	6.39197	5.40867	3
																																		1460	18.9456	24.6158	4	1460	8.62038	7.68438	4	1460	6.34553	6.45216	3
																																		1461	18.2411	24.0925	4	1461	8.66778	7.29516	4	1461	6.30674	6.44685	3
																																		1462	17.6218	25.3479	4	1462	8.54051	6.79404	4	1462	6.17759	6.17516	3
																																		1463	17.2135	25.8607	4	1463	8.48075	7.70788	4	1463	6.11319	6.97316	3
																																		1464	16.7863	26.3127	4	1464	8.29789	8.89884	4	1464	6.04833	5.88051	3
																																		1465	16.3225	27.1381	4	1465	8.24628	6.31686	4	1465	6.08754	6.22785	3
																																		1466	15.8855	27.8536	4	1466	8.21023	6.51913	4	1466	6.1746	5.67544	3
																																		1467	15.4843	28.2662	4	1467	8.28478	7.02935	4	1467	6.12184	5.7576	3
																																		1468	15.1251	27.9952	4	1468	8.36211	7.15903	4	1468	6.0008	6.52168	3
																																		1469	14.8682	28.3481	4					1469	6.00229	6.83392	3
																																		1470	14.7017	29.1309	4					1470	5.96292	7.64328	3
																																		1471	14.627	31.2949	4					1471	5.84768	8.12936	3
																																		1472	14.4665	32.4397	4					1472	5.51689	6.16481	3
																																		1473	14.5788	32.9091	4					1473	5.30676	5.67221	3
																																		1474	14.8526	34.0825	4					1474	5.17768	5.88551	3
																																		1475	15.3409	36.3266	4					1475	4.99783	5.61028	3
																																		1476	16.034	37.0225	4					1476	4.9967	5.76028	3
																																		1477	16.7599	36.6473	4					1477	4.93032	5.87292	3
																																		1478	17.6339	36.0267	4					1478	4.81708	5.2515	3
																																		1479	18.3542	36.5134	4					1479	4.76014	5.87219	3
																																		1480	19.0304	37.0136	4					1480	5.11572	4.55845	3
																																		1481	19.6795	37.3961	4					1481	5.41543	5.51204	3
																																		1482	20.0658	39.5538	4					1482	5.71903	5.47712	3
																																		1483	20.6175	40.4099	4					1483	6.24014	4.9139	3
																																		1484	20.8979	41.571	4					1484	6.40548	5.24169	3
																																		1485	20.5544	41.4077	4					1485	6.43821	4.99914	3
																																		1486	20.7539	41.1705	4					1486	6.46487	3.45559	3
																																		1487	20.5792	41.0114	4					1487	6.52333	3.43252	3
																																		1488	17.3775	39.6211	4					1488	6.55281	5.42594	3
																																		1489	16.3219	37.6689	4					1489	6.60572	6.20222	3
																																		1490	16.8307	35.8881	4					1490	6.52047	6.09622	3
																																		1491	16.8316	34.2777	4					1491	6.33827	8.81972	3
																																		1492	16.7957	32.7647	4					1492	6.25245	8.76671	3
																																		1493	16.6703	34.045	4					1493	5.85418	7.59024	3
																																		1494	16.6939	34.6809	4					1494	5.59373	8.93514	3
																																		1495	17.4185	35.8917	4					1495	5.55131	8.01533	3
																																		1496	17.3564	35.2013	4					1496	5.56915	7.30495	3
																																		1497	17.4125	34.7645	4					1497	5.63691	6.00302	3
																																		1498	17.9002	36.5449	4					1498	5.46889	4.21806	3
																																		1499	19.4087	37.4966	4					1499	5.18873	5.37056	3
																																		1500	20.8281	37.8775	4					1500	5.37667	5.87165	3
																																		1501	21.8176	38.7318	4					1501	5.45931	5.44892	3
																																		1502	22.4363	39.4505	4					1502	5.64761	6.59694	3
																																		1503	22.3978	40.1453	4					1503	5.85849	6.12474	3
																																		1504	22.6947	40.3808	4					1504	5.83867	6.71984	3
																																		1505	22.6126	40.9818	4					1505	5.87123	6.54201	3
																																		1506	22.8187	42.5914	4					1506	5.84306	7.48927	3
																																		1507	22.905	41.3259	4					1507	5.84777	7.57941	3
																																		1508	22.6309	41.9235	4					1508	5.77754	7.77569	3
																																		1509	22.7553	41.0329	4					1509	6.08043	7.23565	3
																																		1510	22.9376	40.8215	4					1510	6.44445	7.02966	3
																																		1511	22.9534	37.8584	4					1511	6.90668	6.11248	3
																																		1512	22.7892	38.102	4					1512	6.74342	6.02849	3
																																		1513	22.5376	37.7646	4					1513	6.73499	7.3227	3
																																		1514	22.8554	35.6147	4					1514	6.85209	6.69388	3
																																		1515	23.004	34.264	4					1515	6.75091	5.74073	3
																																		1516	23.0918	32.8534	4					1516	6.61379	5.34296	3
																																		1517	22.7331	32.3433	4					1517	6.36979	5.19966	3
																																		1518	22.9322	32.2742	4					1518	6.40853	4.82945	3
																																		1519	22.8776	32.4199	4					1519	6.44594	4.90599	3
																																		1520	22.9983	31.851	4					1520	6.34807	4.83601	3
																																		1521	23.1367	31.1706	4					1521	6.20552	4.78385	3
																																		1522	23.2104	30.6298	4					1522	6.01925	5.68707	3
																																		1523	22.827	30.8521	4					1523	5.94951	4.85129	3
																																		1524	22.7798	31.1131	4					1524	5.94963	5.00852	3
																																		1525	22.9096	30.9114	4					1525	6.06787	4.84774	3
																																		1526	22.9614	30.6104	4					1526	6.20482	5.01859	3
																																		1527	22.9912	30.6063	4					1527	6.66037	6.55553	3
																																		1528	23.2614	30.6862	4					1528	6.72709	6.93249	3
																																		1529	23.1953	30.9134	4					1529	6.76484	7.55146	3
																																		1530	23.2309	30.6622	4					1530	6.65458	8.9145	3
																																		1531	23.094	30.7404	4					1531	6.68785	9.69261	3
																																		1532	22.8985	30.8081	4					1532	6.50006	10.2303	3
																																		1533	23.0854	29.8795	4					1533	6.39683	8.41758	3
																																		1534	23.1299	29.3926	4					1534	6.32207	7.32422	3
																																		1535	23.06	29.3393	4					1535	6.30346	7.12206	3
																																		1536	23.0664	29.6418	4					1536	6.26562	6.46365	3
																																		1537	22.8835	29.746	4					1537	6.18657	4.59022	3
																																		1538	22.935	29.9907	4					1538	6.27205	4.13554	3
																																		1539	22.871	30.0266	4					1539	6.08944	4.67112	3
																																		1540	22.707	30.5007	4					1540	5.83706	4.00773	3
																																		1541	22.7117	29.8612	4					1541	5.51305	4.6613	3
																																		1542	22.5699	29.2554	4					1542	5.52519	5.08193	3
																																		1543	22.5626	29.044	4					1543	5.16166	4.7161	3
																																		1544	22.5575	30.2557	4					1544	4.96887	5.02166	3
																																		1545	22.4619	30.5743	4					1545	5.05518	4.59039	3
																																		1546	22.2264	30.3269	4					1546	5.16128	3.96831	3
																																		1547	22.1775	29.9246	4					1547	5.19203	3.80601	3
																																		1548	22.206	28.8619	4					1548	5.04759	3.03003	3
																																		1549	22.211	27.5179	4					1549	4.78202	3.37343	3
																																		1550	22.3412	26.6111	4					1550	4.82635	3.41425	3
																																		1551	22.1029	25.1794	4					1551	4.78215	2.67395	3
																																		1552	22.1235	24.3398	4					1552	4.81375	3.53522	3
																																		1553	21.9909	23.692	4					1553	4.85435	2.99608	3
																																		1554	21.8382	23.7041	4					1554	4.90628	3.11162	3
																																		1555	21.8613	22.8081	4					1555	4.90473	3.8872	3
																																		1556	21.8968	22.7611	4					1556	5.04021	3.49863	3
																																		1557	21.9375	23.5165	4					1557	5.05472	3.56624	3
																																		1558	22.0833	24.2219	4					1558	5.3448	3.9546	3
																																		1559	21.9904	24.3656	4					1559	5.2259	4.16858	3
																																		1560	22.0933	24.1628	4					1560	5.15924	4.24243	3
																																		1561	22.1199	24.5091	4					1561	4.73151	3.94528	3
																																		1562	22.075	24.3201	4					1562	4.57835	3.70166	3
																																		1563	21.8191	24.6257	4					1563	4.52503	3.03188	3
																																		1564	21.7711	25.6823	4					1564	4.56399	2.58917	3
																																		1565	21.6902	26.4798	4					1565	4.58323	3.20126	3
																																		1566	21.742	27.135	4					1566	4.55569	4.46631	3
																																		1567	21.8738	27.6606	4					1567	4.49984	4.11362	3
																																		1568	21.8201	27.138	4					1568	4.41607	3.44211	3
																																		1569	21.772	27.1563	4					1569	4.28399	4.27319	3
																																		1570	22.2499	27.1417	4					1570	4.26397	3.40819	3
																																		1571	22.8979	28.4658	4					1571	4.58569	3.38255	3
																																		1572	22.4673	29.7758	4					1572	4.71816	3.52029	3
																																		1573	21.7294	29.6207	4					1573	4.49569	3.03001	3
																																		1574	21.0557	28.8296	4					1574	4.3896	3.44039	3
																																		1575	21.0165	28.04	4					1575	4.70334	3.80301	3
																																		1576	20.48	28.6847	4					1576	4.90344	4.88831	3
																																		1577	20.309	29.6272	4					1577	4.96824	6.66116	3
																																		1578	20.671	32.8598	4					1578	4.95144	6.61756	3
																																		1579	20.4334	33.9128	4					1579	5.01216	7.38165	3
																																		1580	20.7759	31.9262	4					1580	4.7538	8.99826	3
																																		1581	20.5555	32.4466	4					1581	4.53642	8.71931	3
																																		1582	20	33.6686	4					1582	4.63301	7.29132	3
																																		1583	18.3548	34.2153	4					1583	4.80571	6.74746	3
																																		1584	16.6366	34.7723	4					1584	5.01296	6.44992	3
																																		1585	16.1495	35.8879	4					1585	4.83063	6.10737	3
																																		1586	16.5068	36.4567	4					1586	4.95971	5.94664	3
																																		1587	17.0718	36.8002	4					1587	5.0704	5.29502	3
																																		1588	17.8154	36.1931	4					1588	5.285	4.89783	3
																																		1589	18.3891	36.0994	4					1589	5.46999	4.25601	3
																																		1590	18.6691	36.5458	4					1590	5.3268	4.46215	3
																																		1591	18.0579	37.288	4					1591	5.36947	6.04703	3
																																		1592	16.5462	36.2725	4					1592	5.46495	6.05815	3
																																		1593	16.4326	35.9856	4					1593	5.13767	6.90194	3
																																		1594	15.9823	36.1827	4					1594	5.25394	6.09607	3
																																		1595	15.7804	36.3771	4					1595	5.21058	6.02827	3
																																		1596	16.3216	36.3515	4					1596	5.53858	5.4417	3
																																		1597	16.2929	35.9496	4					1597	5.29948	3.31183	3
																																		1598	17.1008	35.632	4					1598	5.0749	2.44046	3
																																		1599	17.9264	35.0675	4					1599	4.97733	1.99081	3
																																		1600	18.9378	35.2266	4					1600	4.7032	2.146	3
																																		1601	19.8613	38.3559	4					1601	4.65844	1.48651	3
																																		1602	19.8499	40.2045	4					1602	4.83091	2.32054	3
																																		1603	20.0084	43.2231	4					1603	4.82761	2.30986	3
																																		1604	20.0265	44.1079	4					1604	4.92576	2.37239	3
																																		1605	19.4798	44.181	4					1605	4.96065	3.16533	3
																																		1606	19.0123	44.6246	4					1606	4.98322	3.645	3
																																		1607	19.2327	44.3393	4					1607	5.10509	3.35232	3
																																		1608	19.4523	45.2842	4					1608	5.3286	3.29337	3
																																		1609	19.3345	45.051	4					1609	5.28593	3.91562	3
																																		1610	19.3063	43.9561	4					1610	5.36282	4.26991	3
																																		1611	19.343	42.6332	4					1611	5.31883	4.1728	3
																																		1612	19.4706	39.8676	4					1612	5.22489	4.24908	3
																																		1613	18.5549	38.5738	4					1613	4.87221	4.29882	3
																																		1614	19.0256	35.8474	4					1614	4.84139	4.80786	3
																																		1615	20.4384	33.4341	4					1615	4.83635	3.29164	3
																																		1616	20.7978	31.8987	4					1616	4.79611	2.5807	3
																																		1617	21.1698	33.1087	4					1617	4.80351	2.32314	3
																																		1618	21.0968	32.5899	4					1618	4.62376	2.79215	3
																																		1619	21.0895	31.268	4					1619	4.46927	2.93133	3
																																		1620	21.1611	30.6672	4					1620	4.60748	2.52855	3
																																		1621	21.166	30.8889	4					1621	4.44625	2.84671	3
																																		1622	21.2769	31.8297	4					1622	4.37429	1.5049	3
																																		1623	21.1929	33.7663	4					1623	4.16185	0.977911	3
																																		1624	21.0867	34.3974	4					1624	4.1791	1.39449	3
																																		1625	21.1253	34.8061	4					1625	4.10915	1.58189	3
																																		1626	20.9019	34.5859	4					1626	3.88535	1.29841	3
																																		1627	20.7407	35.0676	4					1627	4.01692	1.80626	3
																																		1628	21.0683	34.1673	4					1628	3.90022	1.88068	3
																																		1629	20.6177	32.1757	4					1629	4.01645	2.27793	3
																																		1630	20.2331	32.1371	4					1630	3.91932	2.2996	3
																																		1631	19.9295	32.3805	4					1631	3.92311	2.52613	3
																																		1632	20.0078	33.5128	4					1632	3.99035	3.41291	3
																																		1633	20.3396	35.0385	4					1633	4.03698	3.83604	3
																																		1634	20.4604	36.7603	4					1634	4.29117	4.06795	3
																																		1635	20.6969	37.8668	4					1635	4.52685	3.44586	3
																																		1636	21.5735	39.6781	4					1636	4.84642	2.72172	3
																																		1637	22.0376	40.2766	4					1637	4.84231	2.95835	3
																																		1638	22.292	41.0538	4					1638	4.81503	2.90358	3
																																		1639	22.7141	40.9066	4					1639	4.828	2.32932	3
																																		1640	22.9784	41.7105	4					1640	4.76793	1.5813	3
																																		1641	22.8826	41.814	4					1641	4.91755	1.2525	3
																																		1642	23.0367	40.5305	4					1642	4.96876	1.59543	3
																																		1643	23.2406	40.2214	4					1643	4.87195	1.60866	3
																																		1644	23.384	39.2829	4					1644	4.69699	1.74545	3
																																		1645	23.4487	38.9296	4					1645	4.78606	1.4359	3
																																		1646	23.6705	39.7552	4					1646	4.83801	1.42693	3
																																		1647	23.5497	39.8757	4					1647	5.1401	1.74017	3
																																		1648	23.3788	40.3058	4					1648	5.28503	1.79228	3
																																		1649	23.4242	41.207	4					1649	5.4729	1.90664	3
																																		1650	23.5505	40.9756	4					1650	5.57711	1.94496	3
																																		1651	23.6836	41.0115	4					1651	5.65565	2.12962	3
																																		1652	23.8026	41.8034	4					1652	5.58659	2.03601	3
																																		1653	23.7401	41.1298	4					1653	5.54736	3.00295	3
																																		1654	23.94	40.2608	4					1654	5.64166	3.48	3
																																		1655	24.0427	40.0716	4					1655	5.60937	3.25621	3
																																		1656	23.9967	40.2936	4					1656	5.63589	3.27928	3
																																		1657	23.9288	39.387	4					1657	5.59581	3.32766	3
																																		1658	23.7882	37.4695	4					1658	5.5756	4.58289	3
																																		1659	23.5579	37.3364	4					1659	5.2176	5.52479	3
																																		1660	23.6416	36.5845	4					1660	5.11606	4.96759	3
																																		1661	23.4252	36.1152	4					1661	4.98089	3.18054	3
																																		1662	22.5641	35.1713	4					1662	4.9044	2.96928	3
																																		1663	22.5555	34.6909	4					1663	4.77914	2.96164	3
																																		1664	21.9461	34.029	4					1664	4.65425	2.68766	3
																																		1665	22.5829	35.6939	4					1665	4.75515	2.33668	3
																																		1666	22.8342	35.2659	4					1666	4.78926	3.34375	3
																																		1667	22.6365	40.8709	4					1667	4.80828	4.06954	3
																																		1668	22.6056	43.8778	4					1668	4.87549	3.46233	3
																																		1669	22.3687	44.6629	4					1669	4.91179	3.6473	3
																																		1670	22.0606	43.9268	4					1670	4.81409	3.35688	3
																																		1671	22.0541	43.1734	4					1671	4.67777	3.39782	3
																																		1672	21.9142	42.7097	4					1672	4.70687	2.98068	3
																																		1673	20.5393	42.518	4					1673	4.90117	2.36064	3
																																		1674	17.2886	43.0896	4					1674	4.8068	2.89768	3
																																		1675	14.7178	44.2414	4					1675	4.84651	3.65231	3
																																		1676	15.1195	45.5118	4					1676	4.71473	3.74621	3
																																		1677	15.8255	44.7791	4					1677	4.8281	4.47757	3
																																		1678	16.4684	40.4046	4					1678	5.09084	4.9607	3
																																		1679	16.9429	37.1146	4					1679	4.92279	5.71939	3
																																		1680	17.4939	36.1604	4					1680	4.37894	6.62955	3
																																		1681	18.1433	36.1476	4					1681	4.47367	6.38364	3
																																		1682	19.0513	35.9577	4					1682	4.54023	5.71788	3
																																		1683	19.2809	37.2674	4					1683	4.51844	5.74478	3
																																		1684	19.7385	38.6658	4					1684	4.31609	6.13423	3
																																		1685	20.3447	38.6071	4					1685	4.08664	6.0455	3
																																		1686	20.2757	38.402	4					1686	3.91675	6.38991	3
																																		1687	15.9466	36.8951	4					1687	4.05069	5.4203	3
																																		1688	15.489	35.6204	4					1688	3.95643	5.44854	3
																																		1689	14.155	33.8628	4					1689	3.9292	5.21773	3
																																		1690	13.317	35.5644	4					1690	3.72886	5.3387	3
																																		1691	13.8966	37.285	4					1691	3.85415	5.91682	3
																																		1692	14.2732	37.9991	4					1692	3.77893	5.95869	3
																																		1693	14.0424	38.2987	4					1693	3.94896	5.30057	3
																																		1694	17.033	37.2044	4					1694	3.87698	4.27082	3
																																		1695	16.826	34.2008	4					1695	3.68861	3.87379	3
																																		1696	18.2523	32.8926	4					1696	3.63739	4.41516	3
																																		1697	19.276	32.6341	4					1697	3.57304	4.4726	3
																																		1698	19.3171	32.6868	4					1698	3.62608	4.02954	3
																																		1699	19.5616	32.763	4					1699	3.45581	2.92419	3
																																		1700	19.7101	32.256	4					1700	3.33838	2.83866	3
																																		1701	20.0151	32.4539	4					1701	3.25971	2.36814	3
																																		1702	20.2778	32.9766	4					1702	3.29131	2.53463	3
																																		1703	20.4506	34.3046	4					1703	3.33775	2.9894	3
																																		1704	20.785	35.3321	4					1704	3.51837	2.95097	3
																																		1705	20.7717	34.6607	4					1705	3.60319	3.56359	3
																																		1706	20.6597	32.592	4					1706	3.84496	3.30321	3
																																		1707	18.7861	32.2356	4					1707	4.08035	3.02679	3
																																		1708	17.1504	31.8359	4					1708	4.16064	3.26278	3
																																		1709	18.0391	29.9434	4					1709	4.31653	2.86997	3
																																		1710	16.9542	30.5268	4					1710	4.31317	2.69943	3
																																		1711	17.746	31.188	4					1711	4.31076	2.71628	3
																																		1712	19.9953	33.3589	4					1712	4.3555	2.89932	3
																																		1713	20.4382	34.5699	4					1713	4.3006	2.79143	3
																																		1714	20.3376	32.6056	4					1714	4.35368	2.59821	3
																																		1715	20.5223	32.4539	4					1715	4.27907	2.53036	3
																																		1716	20.6006	33.2793	4					1716	4.26845	3.37681	3
																																		1717	20.4326	32.1653	4					1717	4.30187	3.0987	3
																																		1718	20.6139	32.4313	4					1718	4.2986	2.13623	3
																																		1719	20.7183	32.4232	4					1719	4.24823	1.85622	3
																																		1720	20.8345	32.5119	4					1720	4.20306	3.10213	3
																																		1721	20.622	32.4904	4					1721	4.2177	2.91868	3
																																		1722	21.2212	32.6499	4					1722	4.34213	2.5234	3
																																		1723	21.333	32.5068	4					1723	4.32067	2.95178	3
																																		1724	21.6608	33.8769	4					1724	4.38219	3.42018	3
																																		1725	21.699	31.5714	4					1725	4.30134	3.47011	3
																																		1726	21.8602	32.0707	4					1726	4.36954	3.22266	3
																																		1727	21.7216	32.625	4					1727	4.36034	3.20212	3
																																		1728	21.5862	33.1829	4					1728	4.37535	3.00957	3
																																		1729	21.0671	31.7296	4					1729	4.39495	3.12533	3
																																		1730	20.1586	30.7709	4					1730	4.26414	2.81685	3
																																		1731	19.2644	30.5661	4					1731	4.37096	3.1931	3
																																		1732	18.6354	29.886	4					1732	4.44814	3.28349	3
																																		1733	18.3596	29.1592	4					1733	4.26907	3.21458	3
																																		1734	18.1103	30.7055	4					1734	4.27632	2.98265	3
																																		1735	18.0975	30.7548	4					1735	4.25587	2.47829	3
																																		1736	18.1074	30.1004	4					1736	4.38112	2.26662	3
																																		1737	18.2074	29.9678	4					1737	4.50698	2.15339	3
																																		1738	18.4951	30.1522	4					1738	4.52907	2.43409	3
																																		1739	18.8003	31.3909	4					1739	4.39657	2.71616	3
																																		1740	19.1521	35.1552	4					1740	4.40719	2.62986	3
																																		1741	19.5209	38.5859	4					1741	4.22891	3.41843	3
																																		1742	19.9755	39.4775	4					1742	4.02444	3.7367	3
																																		1743	20.4699	40.7398	4					1743	3.97272	3.1821	3
																																		1744	20.8974	41.4188	4					1744	3.88076	2.9963	3
																																		1745	21.3613	41.2841	4					1745	3.78869	2.8432	3
																																		1746	21.7047	40.8697	4					1746	3.72028	2.5326	3
																																		1747	21.8482	40.5793	4					1747	3.84146	2.78045	3
																																		1748	21.8031	39.9078	4					1748	3.81779	3.46726	3
																																		1749	21.6335	39.4714	4					1749	3.79511	2.80579	3
																																		1750	21.2527	39.474	4					1750	3.98366	2.50773	3
																																		1751	20.8204	39.1249	4					1751	4.22946	2.65234	3
																																		1752	20.4911	38.3688	4					1752	4.4602	2.23039	3
																																		1753	20.1932	39.029	4					1753	4.49566	2.98549	3
																																		1754	20.037	38.5594	4					1754	4.33168	3.3589	3
																																		1755	19.8046	39.3424	4					1755	3.93621	3.57243	3
																																		1756	19.4517	39.1568	4					1756	3.23604	4.42482	3
																																		1757	19.0439	39.1003	4					1757	3.13834	4.04206	3
																																		1758	18.6809	38.359	4					1758	3.01086	3.57148	3
																																		1759	18.4963	36.9627	4					1759	2.96708	3.51442	3
																																		1760	18.4261	36.6071	4					1760	3.17102	3.9875	3
																																		1761	19.3858	36.2131	4					1761	3.02731	3.6464	3
																																		1762	21.9763	37.6155	4					1762	3.00457	3.11775	3
																																		1763	22.3447	38.7357	4					1763	2.89182	3.23289	3
																																		1764	22.2834	39.0218	4					1764	2.78362	3.02912	3
																																		1765	21.8656	39.1255	4					1765	2.61339	3.03956	3
																																		1766	21.7819	36.751	4					1766	2.67296	3.35666	3
																																		1767	19.4016	36.0386	4					1767	2.96526	3.29008	3
																																		1768	17.2077	34.0578	4					1768	3.0588	3.14711	3
																																		1769	19.4273	33.3688	4					1769	3.11304	2.78963	3
																																		1770	21.9746	33.2949	4					1770	3.15631	3.0756	3
																																		1771	21.9577	33.2094	4					1771	3.15876	3.01145	3
																																		1772	21.0928	33.4764	4					1772	3.30794	4.64043	3
																																		1773	20.8019	33.765	4					1773	3.49245	5.11619	3
																																		1774	20.6243	34.0648	4					1774	3.53693	6.44467	3
																																		1775	20.4556	34.178	4					1775	3.53827	5.01308	3
																																		1776	20.2856	34.3566	4					1776	3.578	4.60725	3
																																		1777	20.2992	34.7617	4					1777	3.38663	4.58845	3
																																		1778	20.3473	35.4466	4					1778	3.47689	4.58188	3
																																		1779	20.49	35.9195	4					1779	3.42802	4.44395	3
																																		1780	20.5603	36.3557	4					1780	3.35741	5.69164	3
																																		1781	20.4431	36.9367	4					1781	3.56706	4.80284	3
																																		1782	20.4221	37.926	4					1782	3.64979	3.67531	3
																																		1783	20.474	38.2508	4					1783	3.76238	4.06636	3
																																		1784	20.4059	38.0032	4					1784	3.67154	4.77364	3
																																		1785	20.3549	37.7783	4					1785	3.51359	3.50796	3
																																		1786	20.3657	38.1097	4					1786	3.49839	3.49331	3
																																		1787	20.1273	38.7155	4					1787	3.6218	3.947	3
																																		1788	20.0612	39.2502	4					1788	3.4882	3.62199	3
																																		1789	20.2819	40.8155	4					1789	3.44747	2.72632	3
																																		1790	20.4134	41.3376	4					1790	3.58184	2.79818	3
																																		1791	20.5507	40.8193	4					1791	3.50381	3.08654	3
																																		1792	20.7036	40.7043	4					1792	3.26694	3.29036	3
																																		1793	20.8776	40.914	4					1793	2.97659	2.64175	3
																																		1794	21.1384	41.0401	4					1794	2.96861	3.33633	3
																																		1795	21.2328	40.8815	4					1795	2.77776	2.68696	3
																																		1796	21.4862	41.1523	4					1796	2.89794	3.18369	3
																																		1797	21.7655	41.5836	4					1797	2.99727	3.41198	3
																																		1798	21.9732	42.0554	4					1798	2.84303	2.85992	3
																																		1799	22.2751	42.6036	4					1799	2.91013	3.78759	3
																																		1800	22.59	42.8817	4					1800	2.93192	3.39491	3
																																		1801	22.855	43.433	4					1801	2.86061	2.99183	3
																																		1802	23.3459	43.8012	4					1802	2.92033	2.58035	3
																																		1803	23.6988	43.3873	4					1803	3.05103	2.85448	3
																																		1804	23.7093	43.2004	4					1804	2.84224	2.90737	3
																																		1805	23.6767	42.3219	4					1805	2.58362	3.29914	3
																																		1806	23.5605	41.7757	4					1806	2.64985	2.53308	3
																																		1807	23.3051	40.3708	4					1807	2.74593	2.43251	3
																																		1808	23.1043	40.8018	4					1808	2.76523	1.8176	3
																																		1809	22.6935	41.0583	4					1809	2.55016	1.24905	3
																																		1810	22.7745	41.0967	4					1810	2.47519	1.53774	3
																																		1811	23.2708	41.8592	4					1811	2.4841	1.75307	3
																																		1812	23.8764	42.2441	4					1812	2.38582	1.72747	3
																																		1813	24.3285	41.7811	4					1813	2.27084	1.83163	3
																																		1814	24.6445	41.9847	4					1814	2.2434	2.61821	3
																																		1815	24.6948	42.8991	4					1815	2.09887	3.52544	3
																																		1816	24.5652	43.2707	4					1816	2.13937	4.2546	3
																																		1817	24.8169	43.3172	4					1817	1.96188	5.32612	3
																																		1818	24.8775	43.2107	4					1818	2.01504	4.80826	3
																																		1819	24.7727	44.0288	4					1819	2.06443	3.31409	3
																																		1820	25.0048	45.0453	4					1820	2.1245	3.67872	3
																																		1821	25.1716	45.6822	4					1821	2.03901	4.6542	3
																																		1822	25.3285	46.2079	4					1822	2.16563	4.10718	3
																																		1823	25.5589	45.3768	4					1823	2.22475	3.64925	3
																																		1824	24.9833	43.9453	4					1824	2.21124	4.49208	3
																																		1825	24.8872	44.3395	4					1825	2.31838	3.92171	3
																																		1826	24.9325	44.5618	4					1826	2.36327	4.25338	3
																																		1827	25.0516	44.5701	4					1827	2.29409	3.52759	3
																																		1828	25.0975	44.7422	4					1828	2.54475	3.55616	3
																																		1829	24.7369	45.114	4					1829	2.67126	3.01221	3
																																		1830	24.5257	45.5005	4					1830	2.64141	3.24817	3
																																		1831	24.471	45.7886	4					1831	2.64779	3.21931	3
																																		1832	24.586	45.9598	4					1832	2.83183	2.25371	3
																																		1833	24.3239	46.3944	4					1833	2.8613	2.70533	3
																																		1834	23.5061	46.7793	4					1834	2.97183	2.96814	3
																																		1835	23.7361	46.9684	4					1835	3.06465	2.64591	3
																																		1836	24.2738	47.4416	4					1836	2.99431	2.58101	3
																																		1837	24.5246	47.7076	4					1837	3.15207	3.40988	3
																																		1838	24.544	46.8494	4					1838	3.153	3.35727	3
																																		1839	24.6015	46.4158	4					1839	2.95233	3.93287	3
																																		1840	24.5004	45.8926	4					1840	2.8746	3.81713	3
																																		1841	24.3796	45.6076	4					1841	2.74575	3.97926	3
																																		1842	24.3564	46.7439	4					1842	2.54409	3.63667	3
																																		1843	24.264	47.5352	4					1843	2.54992	3.89944	3
																																		1844	24.3504	48.0129	4					1844	2.46043	3.05144	3
																																		1845	24.3729	48.8312	4					1845	2.5464	2.31718	3
																																		1846	24.6563	49.489	4					1846	2.71421	1.57868	3
																																		1847	24.3998	48.9965	4					1847	2.84549	1.37691	3
																																		1848	24.4365	47.9306	4					1848	3.04359	1.80895	3
																																		1849	24.3116	46.9762	4					1849	3.24417	2.02492	3
																																		1850	24.4096	46.0048	4					1850	3.64331	2.36061	3
																																		1851	24.3787	46.0907	4					1851	3.63889	2.40085	3
																																		1852	24.5702	46.5033	4					1852	3.66657	2.16406	3
																																		1853	24.9465	43.7016	4					1853	3.71489	2.0369	3
																																		1854	24.9723	43.6314	4					1854	3.74273	2.20216	3
																																		1855	25.2196	44.1014	4					1855	3.87626	2.65962	3
																																		1856	25.239	43.9591	4					1856	3.89701	2.87113	3
																																		1857	25.1246	43.6388	4					1857	3.98549	3.21691	3
																																		1858	25.1464	42.5519	4					1858	3.91613	3.43941	3
																																		1859	24.8363	42.2871	4					1859	3.98479	4.08445	3
																																		1860	24.4412	42.951	4					1860	4.05135	5.34957	3
																																		1861	24.6073	43.2035	4					1861	4.31563	5.24966	3
																																		1862	24.5631	41.8616	4					1862	4.47475	4.31303	3
																																		1863	24.2589	40.2072	4					1863	4.46418	3.55833	3
																																		1864	24.1835	39.6331	4					1864	4.37401	3.35498	3
																																		1865	24.5571	39.1678	4					1865	4.4452	2.80074	3
																																		1866	24.9421	39.2429	4					1866	4.47306	2.54709	3
																																		1867	24.7801	39.5826	4					1867	4.52048	2.8624	3
																																		1868	24.7665	41.4508	4					1868	4.58324	3.51019	3
																																		1869	24.9721	42.9483	4					1869	4.62757	4.2243	3
																																		1870	24.7289	44.033	4					1870	4.56659	4.36552	3
																																		1871	23.8889	43.7627	4					1871	4.5917	4.67448	3
																																		1872	24.2204	42.8605	4					1872	4.65278	5.17444	3
																																		1873	23.9719	42.5517	4					1873	4.644	4.64232	3
																																		1874	23.7683	43.4832	4					1874	4.70147	4.74135	3
																																		1875	23.6941	42.881	4					1875	4.90541	3.38085	3
																																		1876	23.7766	41.6296	4					1876	5.0181	2.28733	3
																																		1877	23.5086	42.1459	4					1877	5.05882	2.05046	3
																																		1878	23.0516	42.7784	4					1878	5.03218	1.21409	3
																																		1879	23.0755	42.9366	4					1879	5.27998	1.19517	3
																																		1880	23.5289	42.2641	4					1880	5.4955	0.949092	3
																																		1881	24.0374	42.7448	4					1881	5.52584	1.03239	3
																																		1882	24.5188	43.1514	4					1882	5.74865	2.25452	3
																																		1883	25.3161	43.827	4					1883	6.00694	1.89197	3
																																		1884	26.3317	43.8317	4					1884	6.09869	2.28058	3
																																		1885	26.2659	39.7731	4					1885	6.10021	2.22956	3
																																		1886	25.0898	37.71	4					1886	6.16845	2.29451	3
																																		1887	23.9675	35.2408	4					1887	6.38681	2.51808	3
																																		1888	23.2155	35.6744	4					1888	6.42884	3.02846	3
																																		1889	22.8719	36.8728	4					1889	6.46083	2.82405	3
																																		1890	22.6368	38.0624	4					1890	6.49107	2.77636	3
																																		1891	22.6332	39.4288	4					1891	6.72431	2.75358	3
																																		1892	22.5098	39.7291	4					1892	6.97388	3.66976	3
																																		1893	22.8194	39.0256	4					1893	7.04178	3.49743	3
																																		1894	23.1191	38.9211	4					1894	6.97919	3.27248	3
																																		1895	22.9933	39.3018	4					1895	7.12469	3.42453	3
																																		1896	22.9518	39.0323	4					1896	7.15609	2.7227	3
																																		1897	19.9179	39.248	4					1897	7.32829	2.18565	3
																																		1898	21.2944	39.5447	4					1898	7.223	1.70569	3
																																		1899	19.3171	40.9359	4					1899	7.23001	1.12574	3
																																		1900	17.4805	41.7057	4					1900	7.21613	0.921053	3
																																		1901	15.3338	42.2925	4					1901	7.17146	2.08972	3
																																		1902	13.2767	41.6432	4					1902	6.99634	2.36902	3
																																		1903	12.294	40.8769	4					1903	6.78563	2.29958	3
																																		1904	11.9431	42.0467	4					1904	6.8047	3.24003	3
																																		1905	11.8868	41.2892	4					1905	6.83172	4.22269	3
																																		1906	12.0714	39.6712	4					1906	6.90932	4.24807	3
																																		1907	12.3635	40.0486	4					1907	7.02186	3.48423	3
																																		1908	12.4643	40.5345	4					1908	6.91242	3.00162	3
																																		1909	12.5288	41.4832	4					1909	6.93142	3.25508	3
																																		1910	12.7428	40.8764	4					1910	6.90228	3.12245	3
																																		1911	13.0082	40.4577	4					1911	6.73349	3.13668	3
																																		1912	13.4962	41.2487	4					1912	6.7043	3.53791	3
																																		1913	14.1602	40.9952	4					1913	6.59772	4.12129	3
																																		1914	14.97	40.0483	4					1914	6.30742	3.39882	3
																																		1915	16.0031	39.0224	4					1915	6.0587	2.78552	3
																																		1916	17.1061	40.2173	4					1916	6.04197	2.46201	3
																																		1917	18.1642	41.4958	4					1917	6.12466	2.27731	3
																																		1918	19.1667	40.8568	4					1918	5.98941	2.95408	3
																																		1919	20.1877	40.7175	4					1919	5.95069	2.73847	3
																																		1920	20.9751	41.5218	4					1920	6.16527	2.71258	3
																																		1921	21.5695	42.1971	4					1921	5.85971	2.86192	3
																																		1922	21.4591	43.6814	4					1922	5.57863	3.13699	3
																																		1923	21.1188	44.4397	4					1923	5.74151	2.77023	3
																																		1924	21.2824	44.2892	4					1924	5.76406	2.85952	3
																																		1925	22.3204	45.0433	4					1925	5.58648	2.53926	3
																																		1926	23.5803	44.9754	4					1926	5.46368	2.92389	3
																																		1927	25.0177	42.7061	4					1927	5.37589	3.01001	3
																																		1928	24.6579	41.3773	4					1928	5.35585	2.80709	3
																																		1929	24.5271	41.9938	4					1929	5.27931	3.15973	3
																																		1930	24.6375	42.6562	4					1930	5.03369	3.18782	3
																																		1931	24.994	42.4871	4					1931	5.19463	2.96452	3
																																		1932	25.3015	41.6382	4					1932	5.25552	2.09498	3
																																		1933	25.2653	40.5776	4					1933	4.95176	1.44735	3
																																		1934	24.9997	39.6494	4					1934	4.77569	1.7566	3
																																		1935	25.2977	38.7967	4					1935	4.67812	1.49448	3
																																		1936	25.6328	38.7736	4					1936	4.603	1.61598	3
																																		1937	25.5704	39.8423	4					1937	4.53836	1.2013	3
																																		1938	25.71	41.4973	4					1938	4.68848	1.44808	3
																																		1939	25.7109	42.1508	4					1939	4.59335	2.14803	3
																																		1940	25.8366	42.6918	4					1940	4.97915	2.11158	3
																																		1941	26.0246	42.3418	4					1941	5.22563	1.94131	3
																																		1942	25.6583	41.9624	4					1942	5.18441	1.94593	3
																																		1943	25.4912	39.7771	4					1943	5.20511	2.36749	3
																																		1944	25.5716	39.2263	4					1944	5.01021	2.98393	3
																																		1945	25.4059	39.1612	4					1945	5.00988	2.71694	3
																																		1946	25.3086	38.4214	4					1946	5.17946	1.98654	3
																																		1947	25.2614	38.3141	4					1947	5.44296	1.73442	3
																																		1948	25.2448	40.1729	4					1948	5.7364	1.83339	3
																																		1949	25.2632	41.3065	4					1949	5.70308	1.4605	3
																																		1950	25.1927	41.1527	4					1950	5.60014	1.55798	3
																																		1951	25.2608	40.9991	4					1951	5.5106	1.87643	3
																																		1952	25.3971	40.7357	4					1952	5.45063	2.11053	3
																																		1953	25.4858	40.7862	4					1953	5.35064	2.49513	3
																																		1954	25.5283	38.5594	4					1954	5.39128	2.66781	3
																																		1955	25.5798	39.6384	4					1955	5.25635	2.60454	3
																																		1956	25.7173	40.4736	4					1956	5.25816	2.65833	3
																																		1957	25.6505	40.6943	4					1957	5.23918	2.58109	3
																																		1958	25.5573	41.0766	4					1958	5.18724	2.67116	3
																																		1959	25.7414	42.0227	4					1959	5.26402	2.203	3
																																		1960	25.9514	42.1751	4					1960	5.19906	1.94124	3
																																		1961	26.2182	41.4835	4					1961	5.15827	2.14199	3
																																		1962	26.2143	42.1083	4					1962	5.17667	2.33851	3
																																		1963	26.187	43.8338	4					1963	5.1987	1.6977	3
																																		1964	26.1773	44.4358	4					1964	5.23732	1.58884	3
																																		1965	26.2403	44.4166	4					1965	5.18753	1.98378	3
																																		1966	26.0972	44.3448	4					1966	5.35328	2.05649	3
																																		1967	26.0495	44.3386	4					1967	5.4252	2.04331	3
																																		1968	26.0489	44.7897	4					1968	5.48282	1.63864	3
																																		1969	26.1688	44.7699	4					1969	5.10177	2.07057	3
																																		1970	26.611	45.116	4					1970	4.80822	2.65437	3
																																		1971	26.9048	46.0627	4					1971	4.77586	2.88479	3
																																		1972	26.9793	46.791	4					1972	4.60815	2.25473	3
																																		1973	27.1769	46.6037	4					1973	4.42992	1.96453	3
																																		1974	26.7846	47.1021	4					1974	4.20047	1.79489	3
																																		1975	26.4993	46.6948	4					1975	4.10685	1.93163	3
																																		1976	26.4069	45.3665	4					1976	4.1375	1.53334	3
																																		1977	26.2704	44.2293	4					1977	4.27984	1.44543	3
																																		1978	26.2202	44.0798	4					1978	4.54744	1.67534	3
																																		1979	26.4007	43.5709	4					1979	4.52946	1.80001	3
																																		1980	26.5367	42.4253	4					1980	4.33239	1.48237	3
																																		1981	26.4082	42.2246	4					1981	4.3843	2.13751	3
																																		1982	26.5057	42.4965	4					1982	4.27773	1.8119	3
																																		1983	26.478	43.4863	4					1983	4.27177	1.96048	3
																																		1984	26.6724	45.1021	4					1984	4.49837	1.93457	3
																																		1985	26.7256	46.3401	4					1985	4.22469	2.13252	3
																																		1986	26.4463	46.7339	4					1986	4.26932	2.25612	3
																																		1987	26.2063	47.5281	4					1987	4.18141	1.47262	3
																																		1988	26.2204	47.7094	4					1988	4.1103	1.74932	3
																																		1989	26.2936	47.3012	4					1989	4.16139	1.42837	3
																																		1990	26.2072	46.5903	4					1990	4.08155	2.13172	3
																																		1991	26.1326	44.051	4					1991	3.9939	2.94062	3
																																		1992	25.982	42.7108	4					1992	4.15988	2.06313	3
																																		1993	25.861	41.9467	4					1993	4.17828	2.00784	3
																																		1994	25.4024	42.6484	4					1994	4.24676	2.29734	3
																																		1995	25.2809	42.7883	4					1995	4.31717	2.23127	3
																																		1996	25.3053	42.8755	4					1996	4.37256	2.36054	3
[truncated: 4,618 more rows]
