# Supplementary material for: Structure of massively dilatant faults in Iceland: lessons learned fromhigh resolution UAV data
Source: Copernicus journal article supplement (doi:10.5194/se-2019-117), 2019-06-27
Supplement: Supplementary file 2 [file S2.pdf › Supplement Weismueller et al/Supplementary figures/S2.pdf]

## Calculated measuring error for deviation from strike-orthogonal scanline

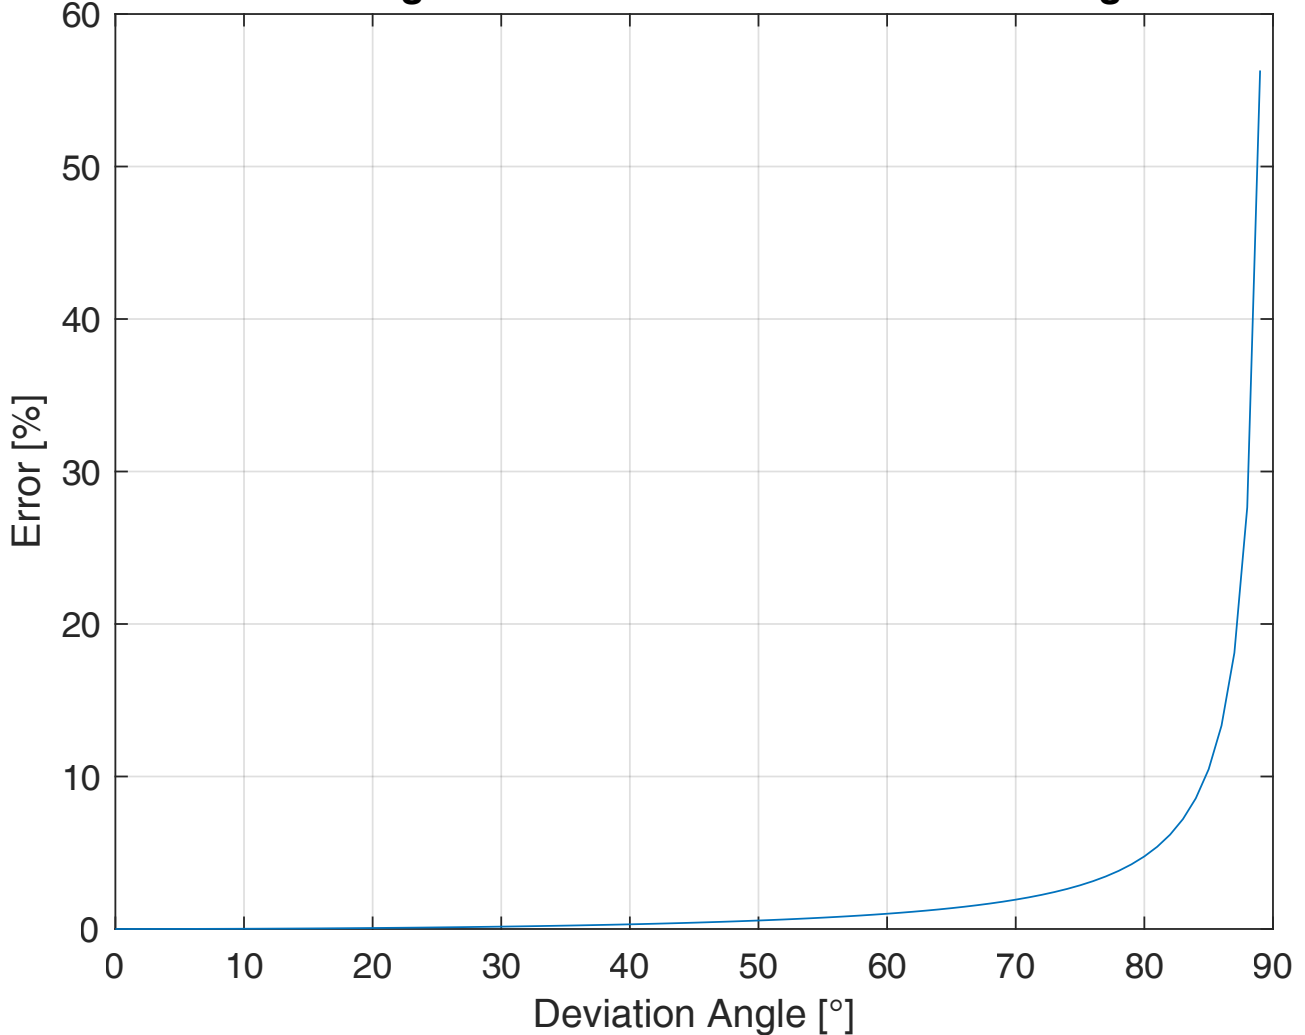

S2: Relative error in % for measuring opening widths with scanlines. The error increases slowly with increasing deviation from a strike orthogonal scanline. Errors become significant for deviations  $> 60^\circ$  and are less than 1% for deviations  $< 60^\circ$ . Analytic solution.
