# Supplementary material for: Structure of massively dilatant faults in Iceland: lessons learned fromhigh resolution UAV data
Source: Copernicus journal article supplement (doi:10.5194/se-2019-117), 2019-06-27
Supplement: Supplementary file 3 [file S3.pdf › Supplement Weismueller et al/Supplementary figures/S3.pdf]

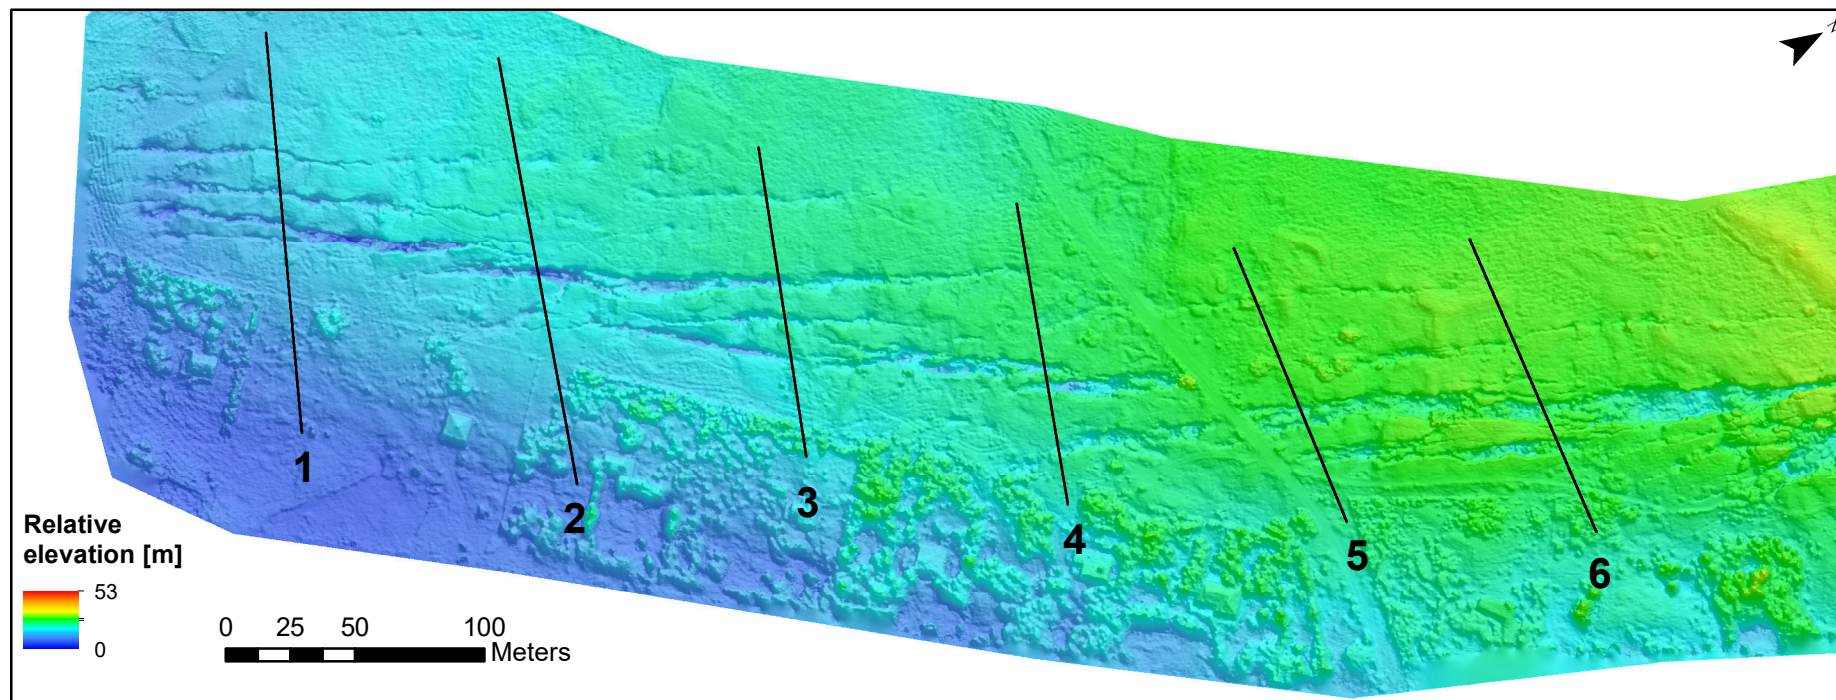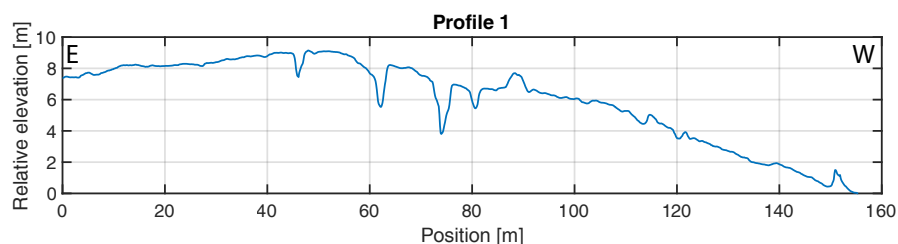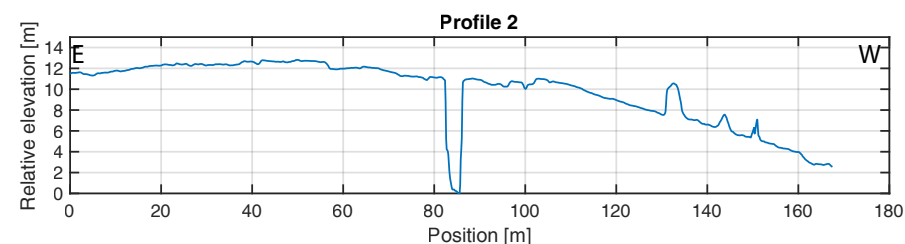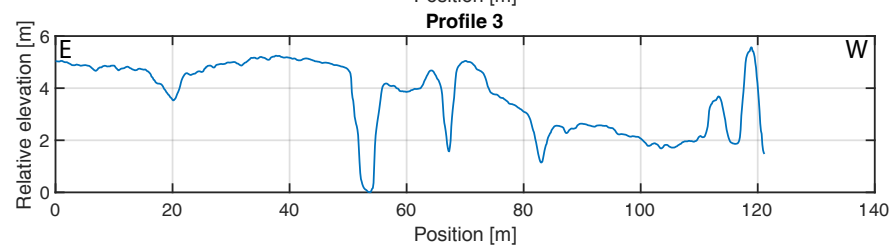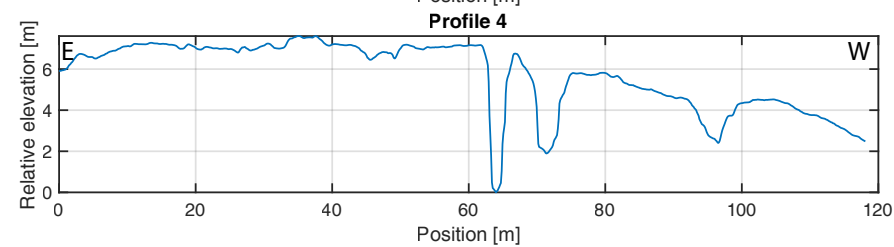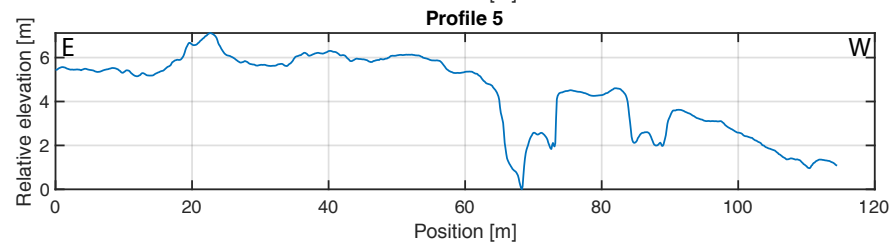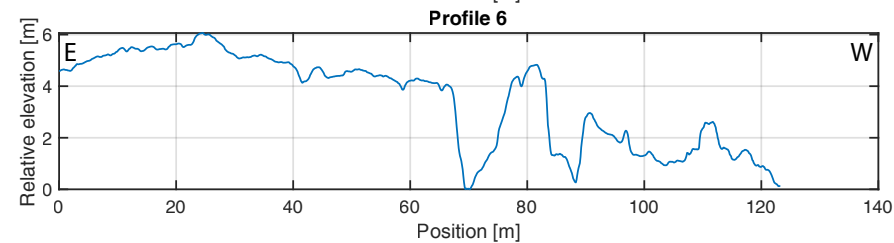

S3: Elevation profiles across the en échelon fractures in the S of the Thingvellir DEM. Vertical offsets across single fractures are small  $< 2$  m, however the accumulated vertical offset over several fractures becomes larger. Also note the general slope of the surface which has been interpreted as tilted block. Coordinates of DEM section: W21°08'49" N64°14'21".
