# Supplementary material for: Structure of massively dilatant faults in Iceland: lessons learned fromhigh resolution UAV data
Source: Copernicus journal article supplement (doi:10.5194/se-2019-117), 2019-06-27
Supplement: Supplementary file 9 [file S5.pdf › Supplement Weismueller et al/Supplementary figures/S5.pdf]

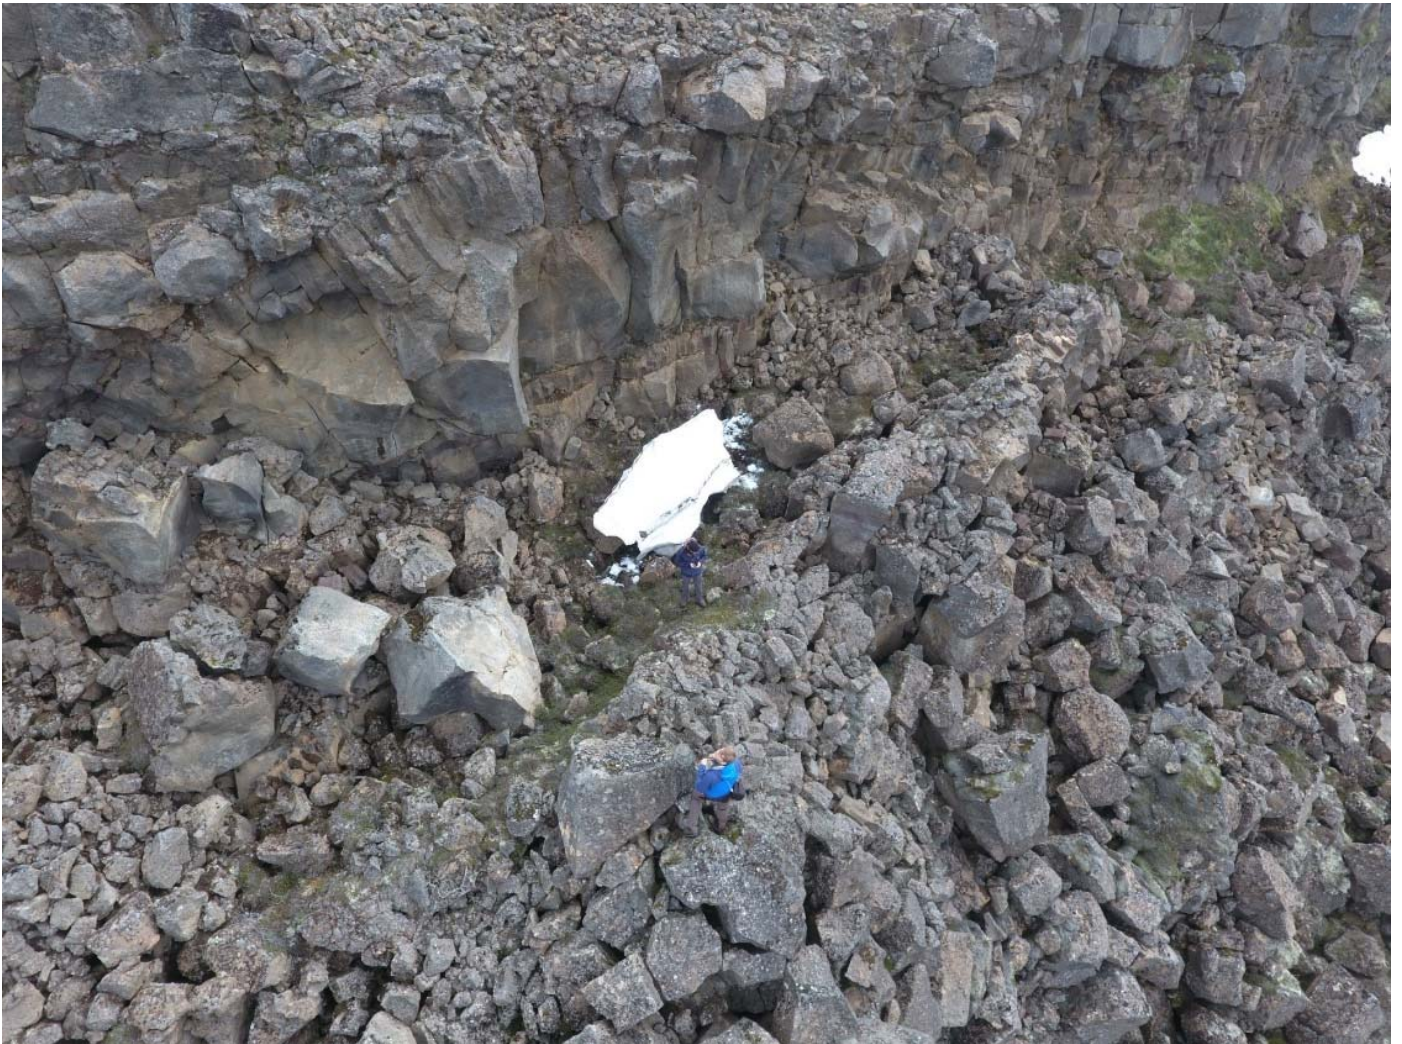

S5.1: Successive lava flows on the left, partly disintegrated TB on the right.  
16°59'20"W 65°54'49"N.  
N in the top right.



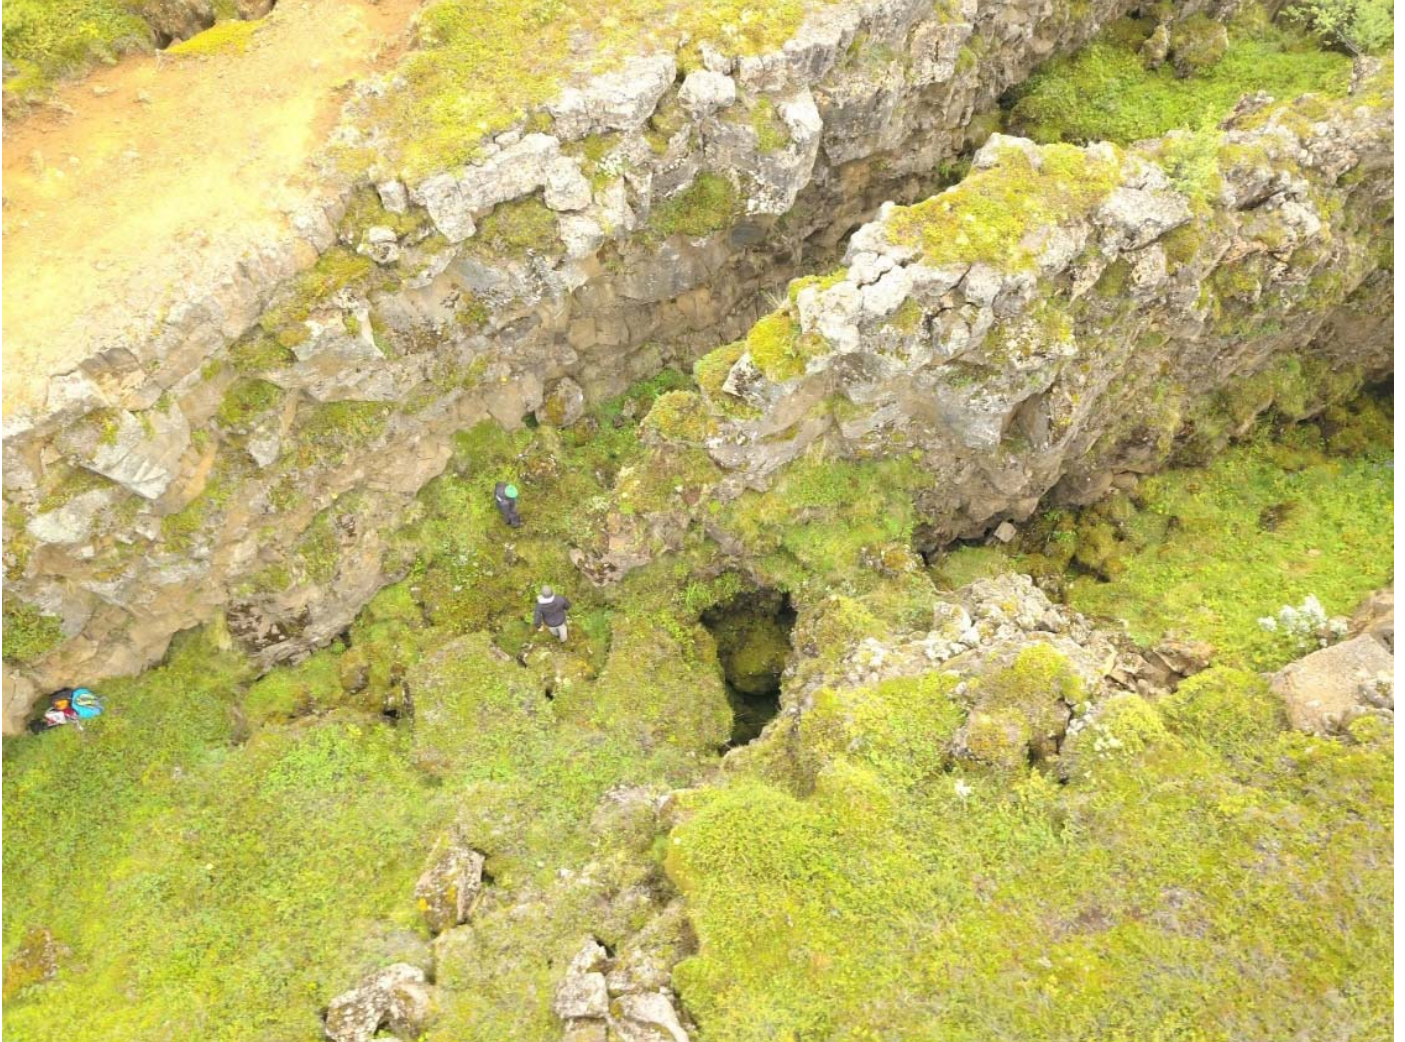

S5.2: Standing relay on the right, the opening is filled with basalt rubble, soil and vegetation.  
16°38'2"W 66°2'29"N.  
North in the top right



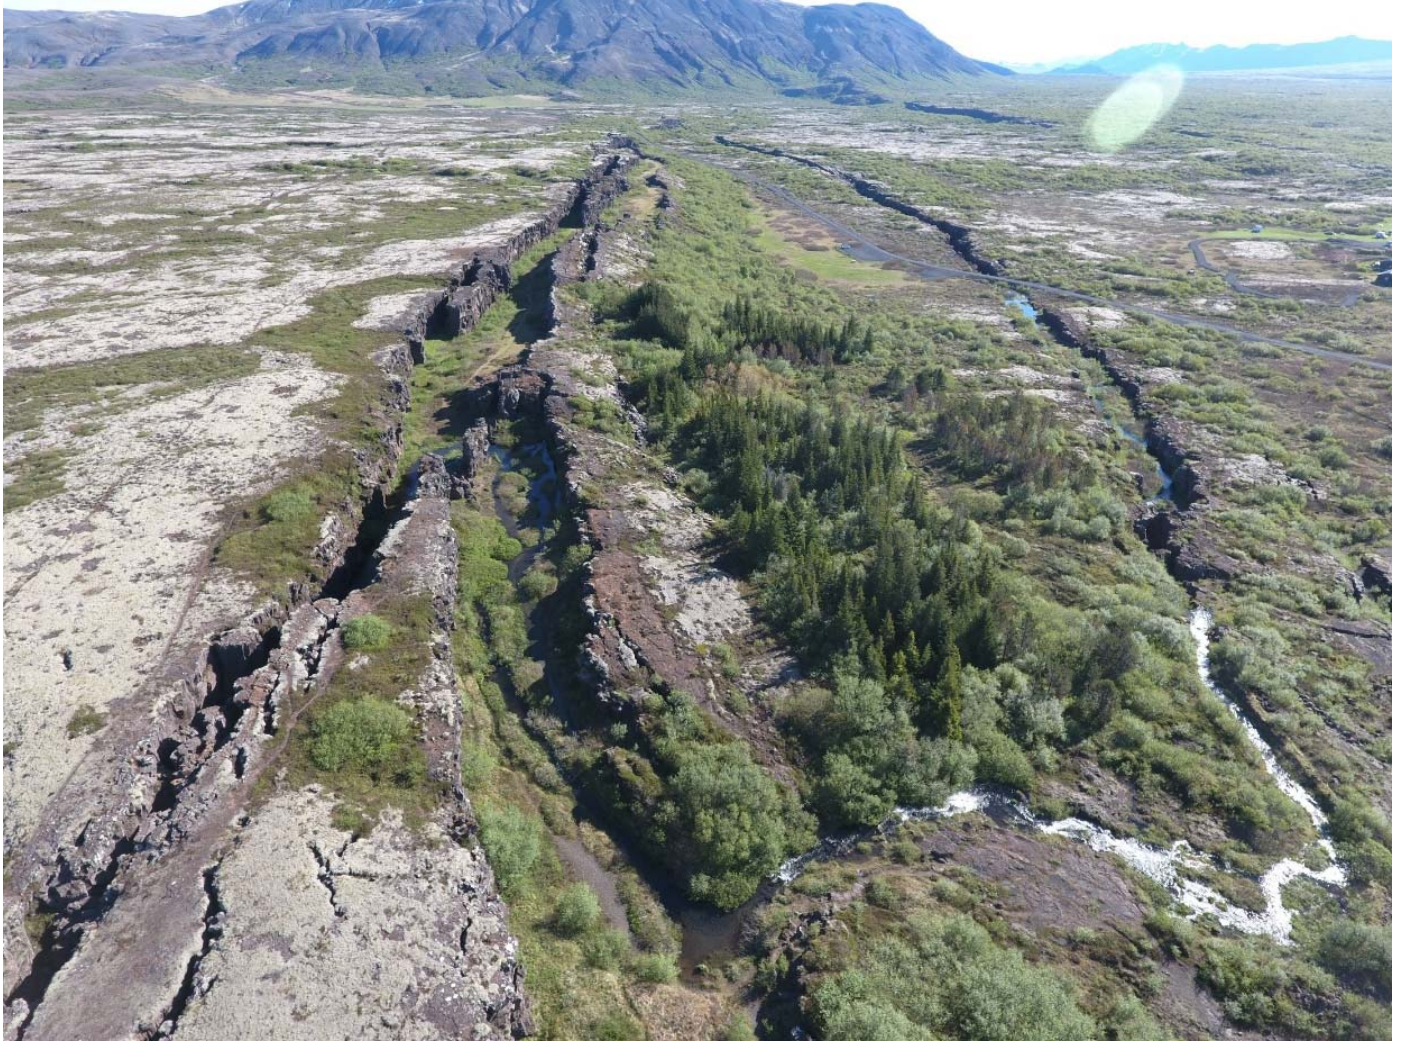

S5.3: TB and relay in Thingvellir.  
21° 5'49"W 64°16'46"N.  
N in the top right



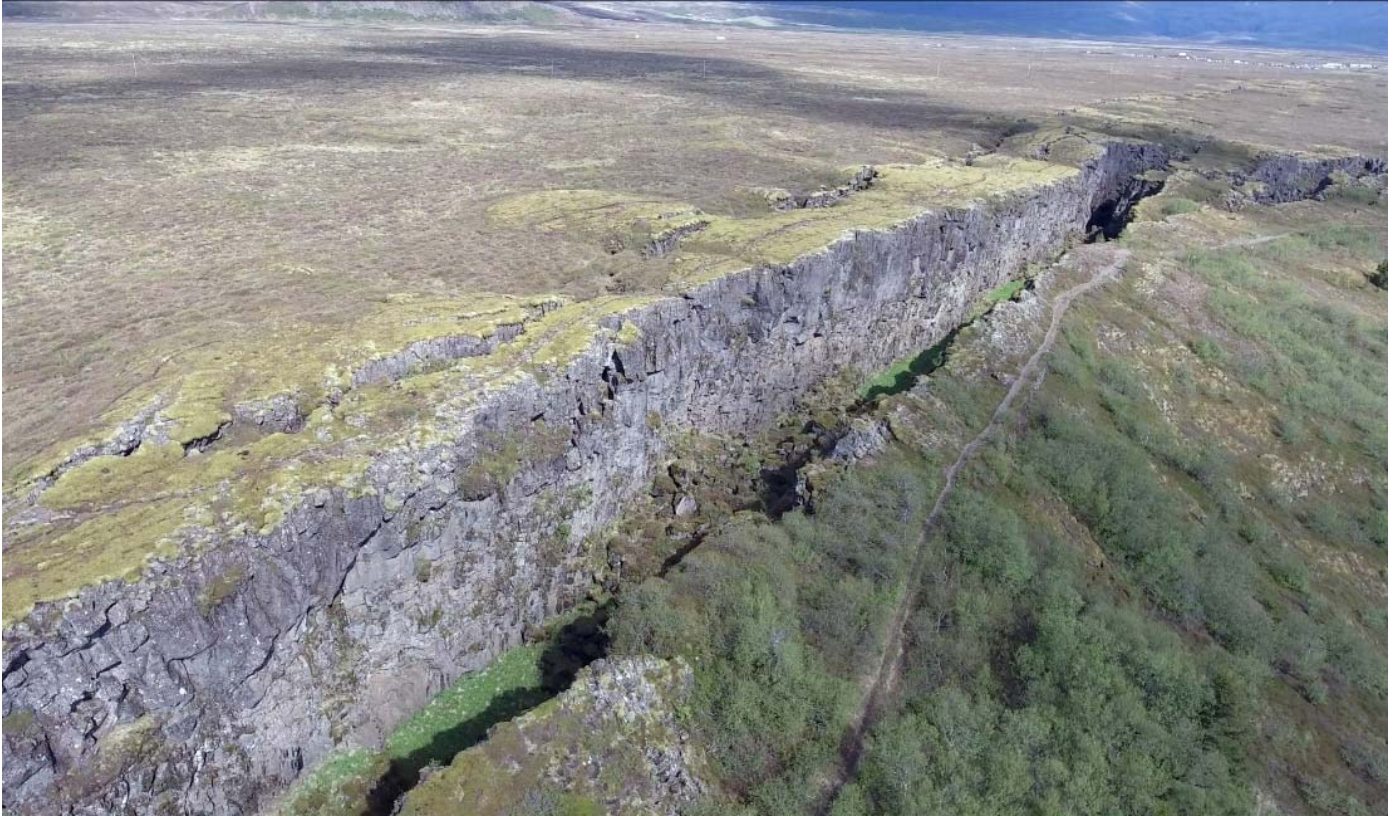

S5.4: Successive lava flows exposed at the fracture wall on the left and TB on the right in Thingvellir.  
21° 8'37"W 64°14'34"N.  
W to the left and E to the right.

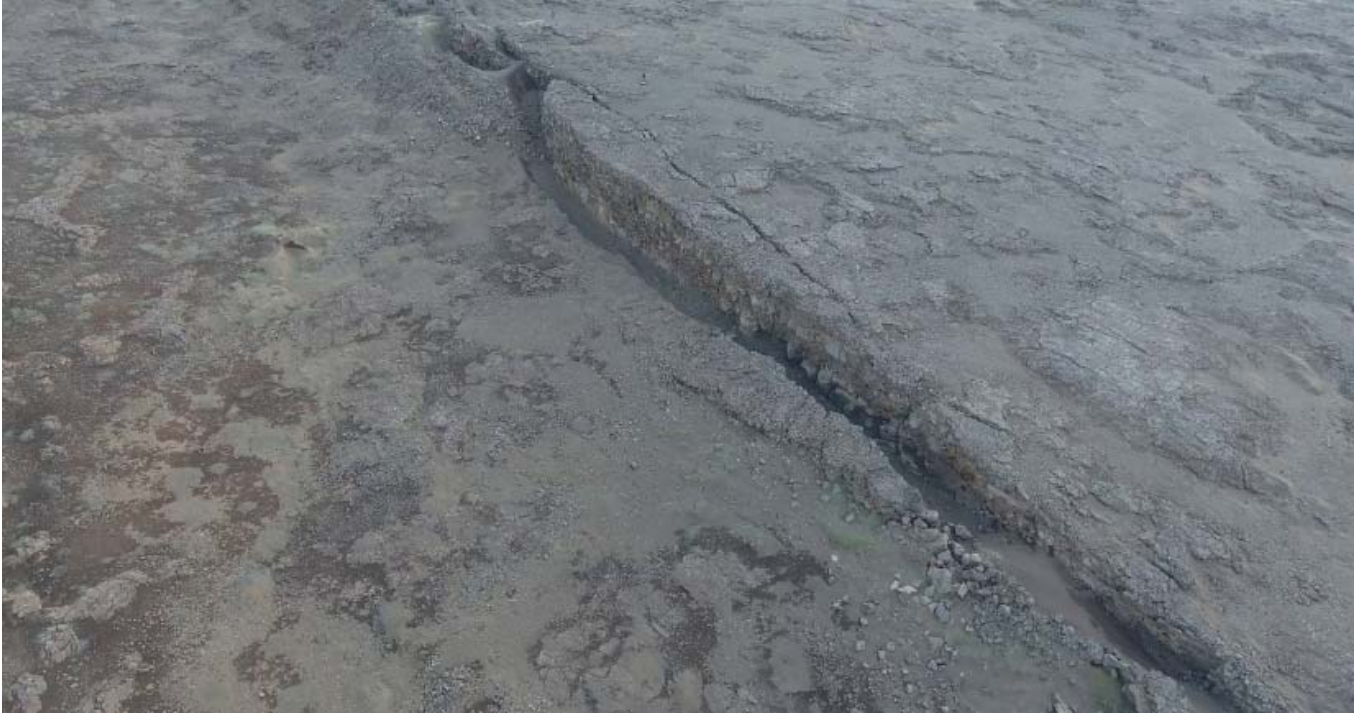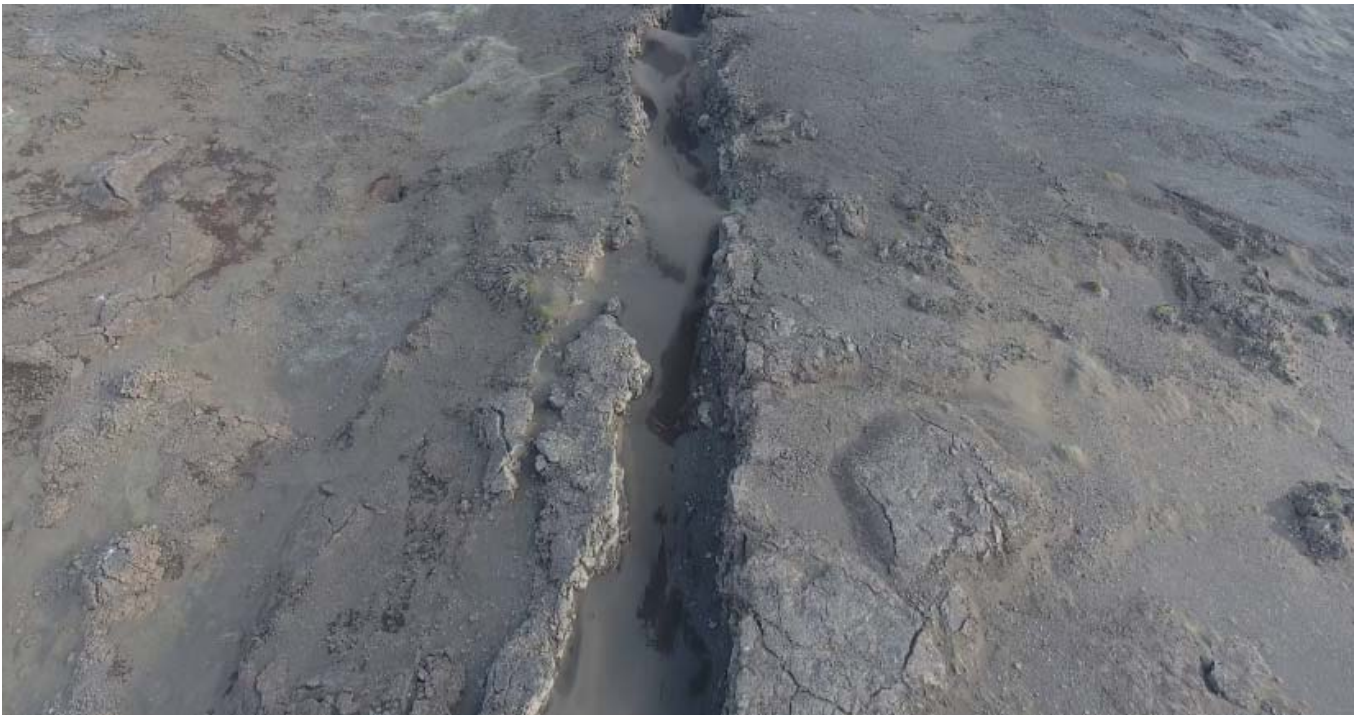

S5.5: Openings filled and locally covered by sediment.

Top: : 17°0'21"W 65°50'51"N

Bottom: 17°0'21"W 65°50'46"N

Orientation: E to the left and W to the right



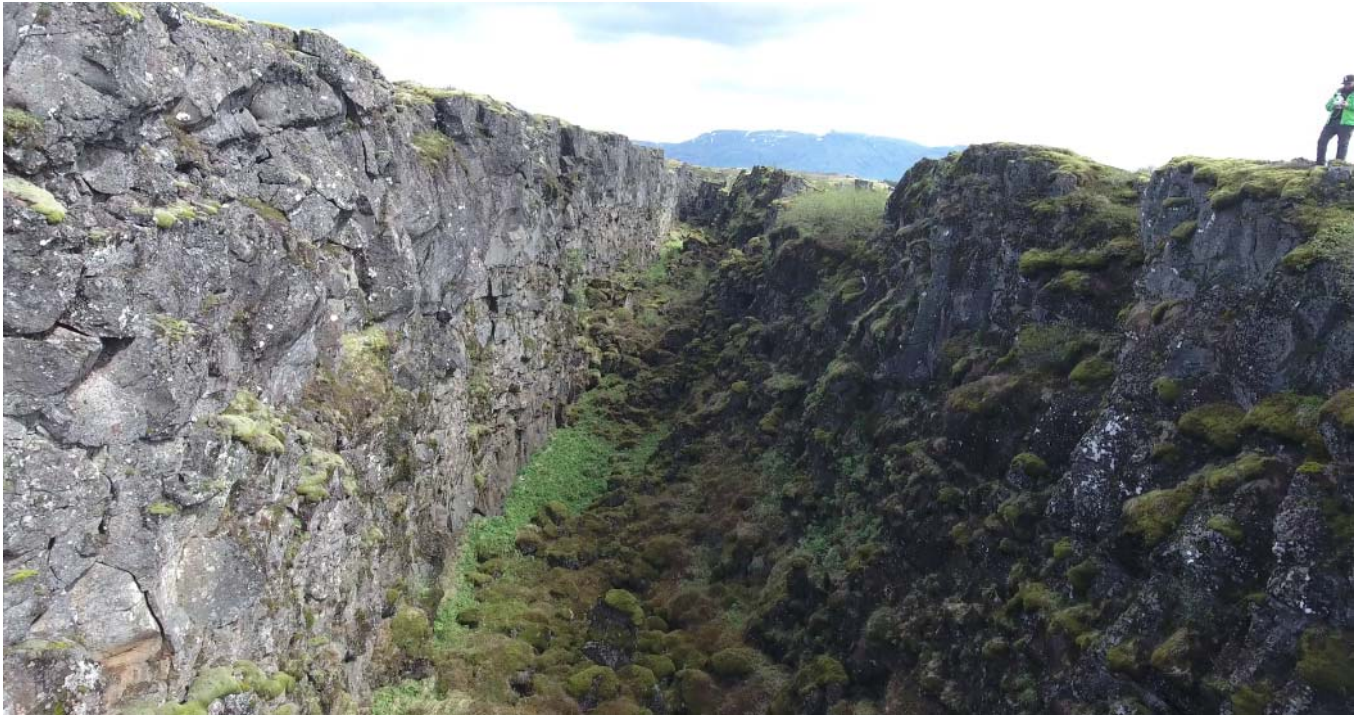

S5.6: Successive lava flows exposed at the fracture wall on the left and TB on the right in Thingvellir. Rubble and vegetation fill the opening at the bottom.

21° 8,41"W 64°14'30"N.

N in the top right.

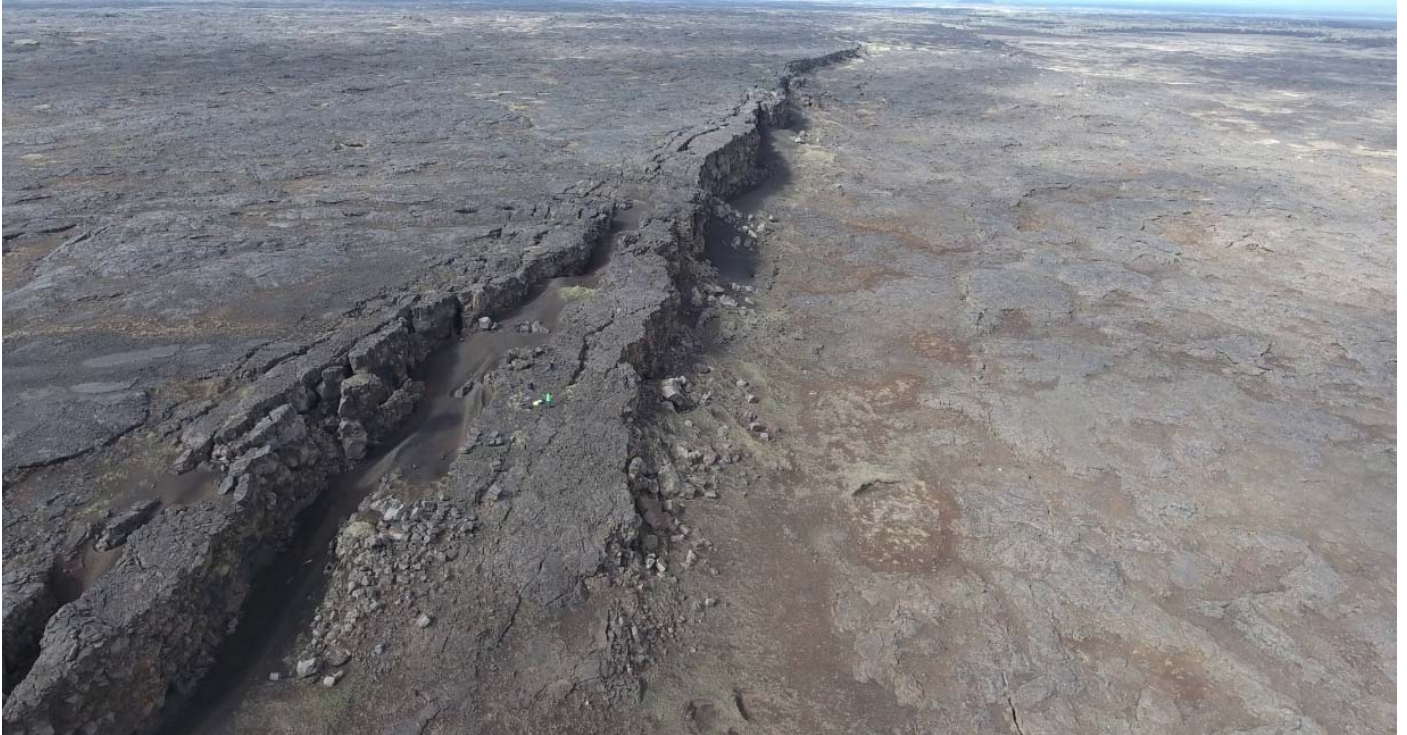

S5.7: Relay ramp on a graben associated to the Askjá fissure swarm. Openings of the dilatant faults have been filled by sediment.

16°17'22"W 65°32'10"N

Orientation: E to the left and W to the right.



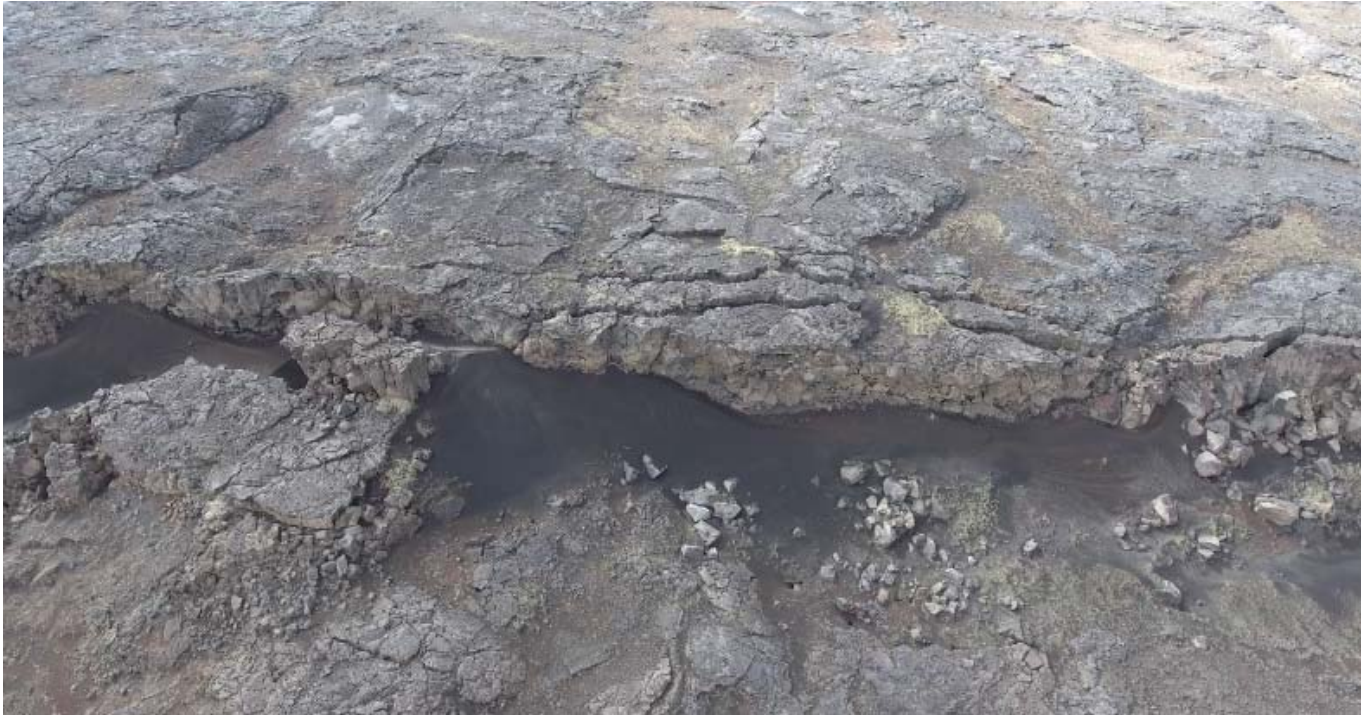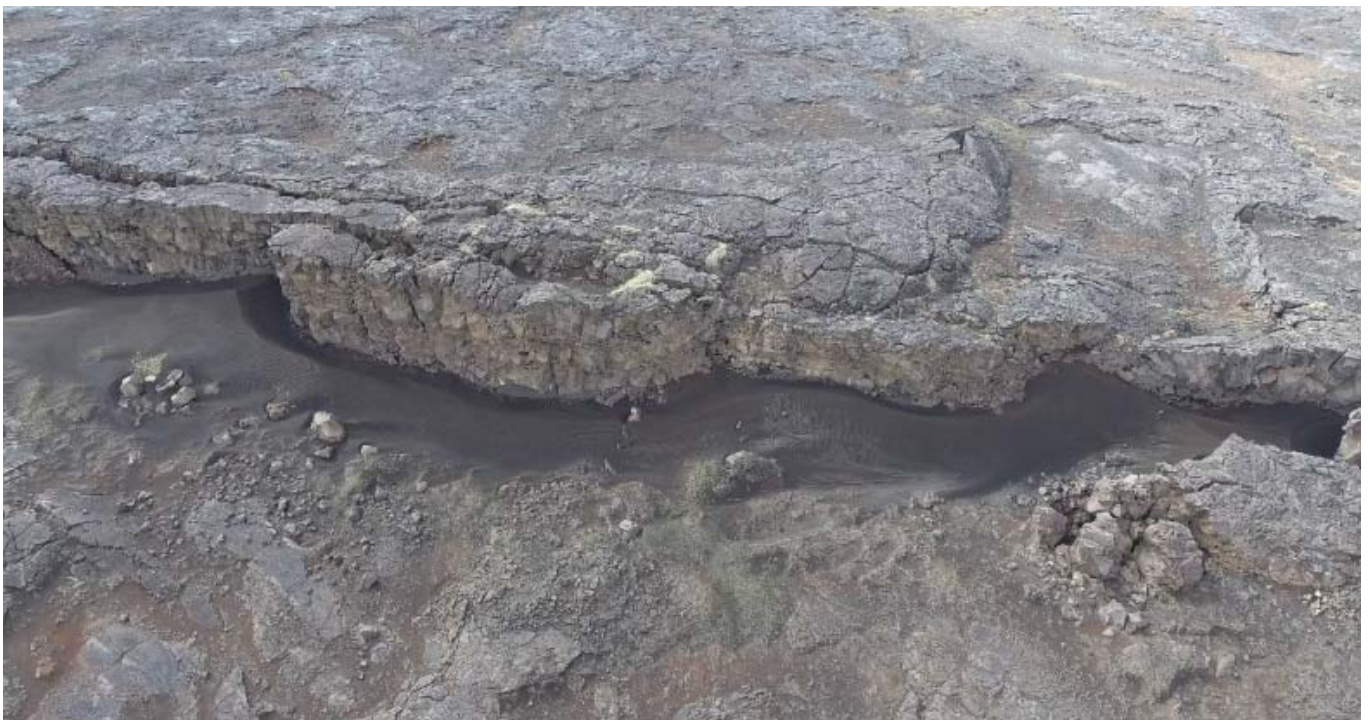

S5.8: Fractures associated to the Askjá fissure swarm. Openings of the dilatant faults have been filled by sediment on top of the hanging wall.

Ca. 16°17'26"W 65°32'17"N

Orientation: S to the left and N to the right
