# Supplementary material for: Structure of massively dilatant faults in Iceland: lessons learned fromhigh resolution UAV data
Source: Copernicus journal article supplement (doi:10.5194/se-2019-117), 2019-06-27
Supplement: Supplementary file 10 [file S6.pdf › Supplement Weismueller et al/Supplementary figures/S6.pdf]

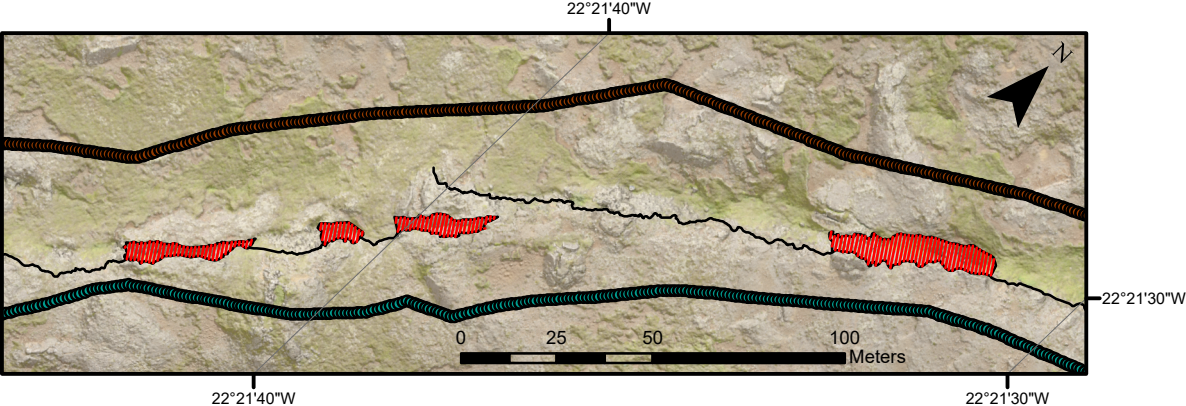

— Opening  
— Fracture trace

● Elevation hanging wall  
● Elevation footwall

S6: Opening width and vertical offset as extracted in Vugar. Note the no opening width sections next to clearly open sections. Due to the opening width extraction and mapping style of these transitions (1 m distance between the scanlines), small opening widths in these areas are underrepresented.
