# Supplementary figures and images for: Structure of massively dilatant faults in Iceland: lessons learned fromhigh resolution UAV data
Source: Copernicus journal article supplement (doi:10.5194/se-2019-117), 2019-06-27

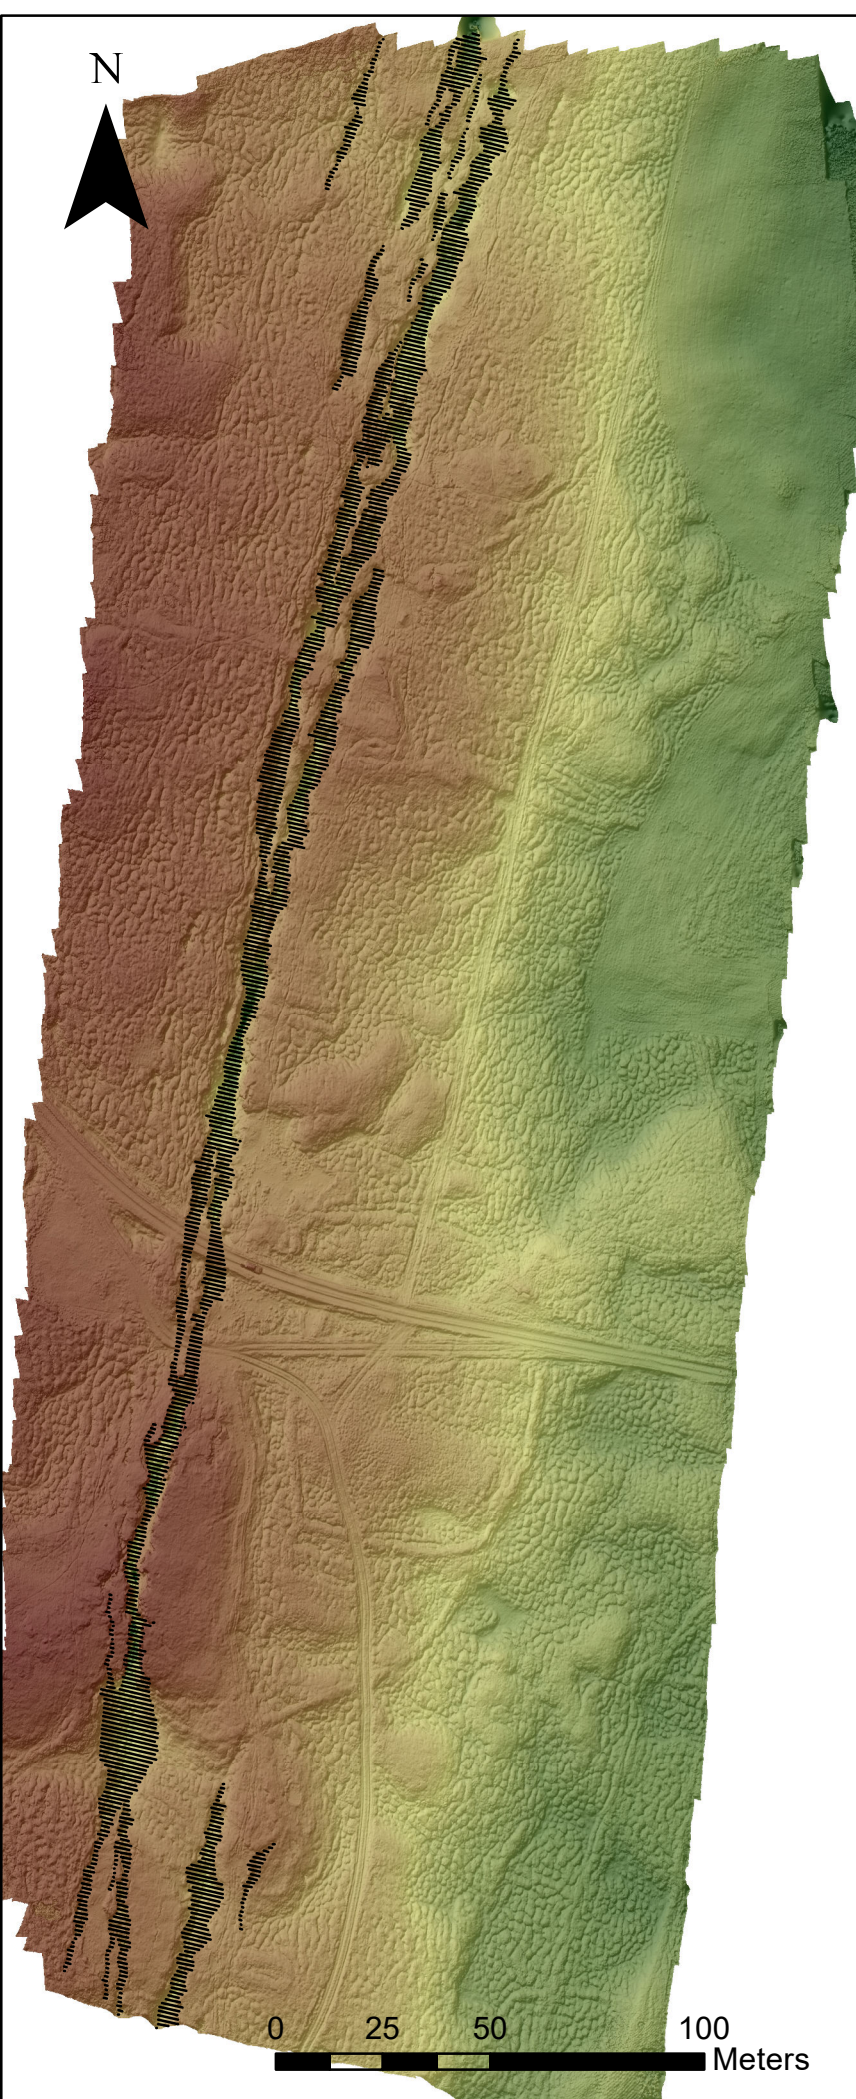

— TB

Relative  
elevation [m]

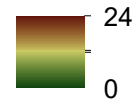

Asbyrgi first fissure

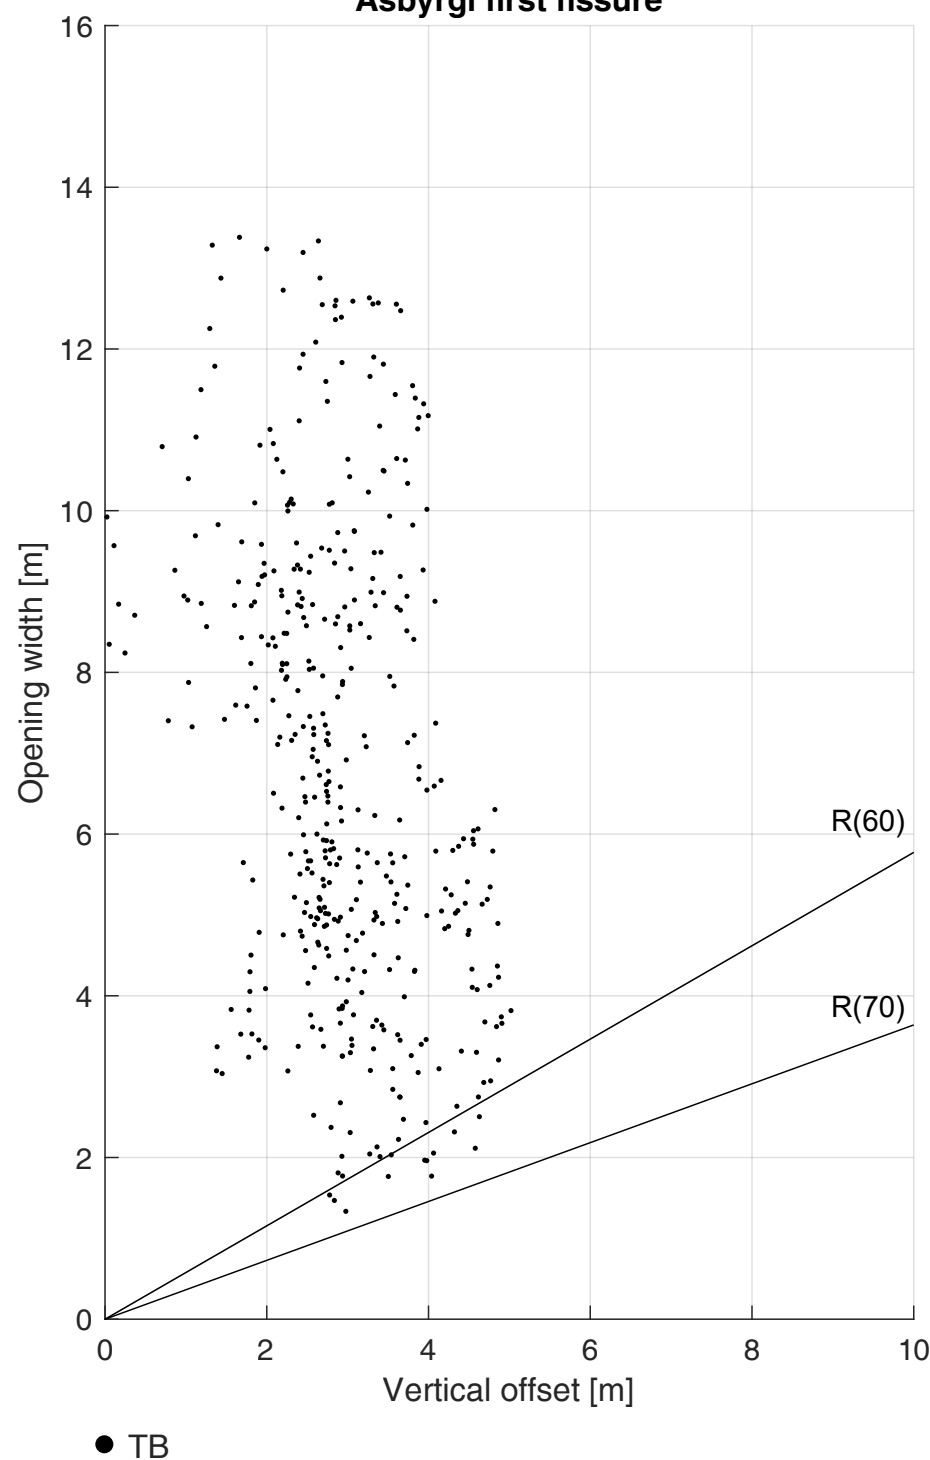

S4.1: DEM and endmember types for Asbyrgi FF. 16°37'46"W 66°2'57"N

Supplement: Supplementary file 4 [file S4.1.pdf › Supplement Weismueller et al/Supplementary figures/S4.1.pdf]

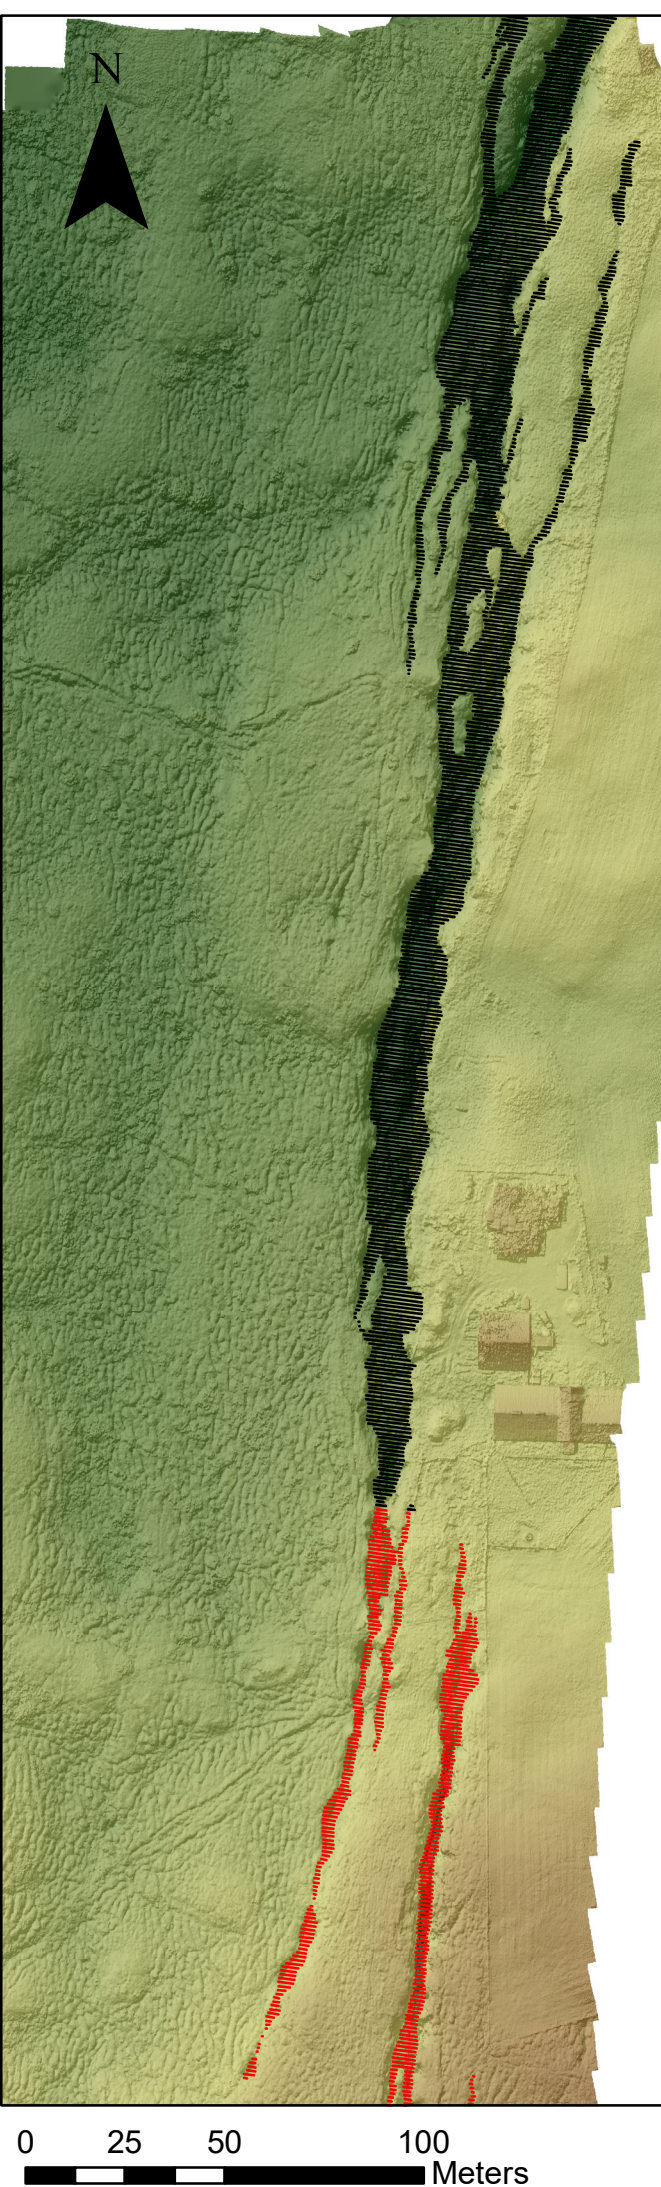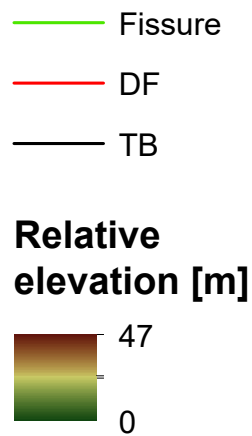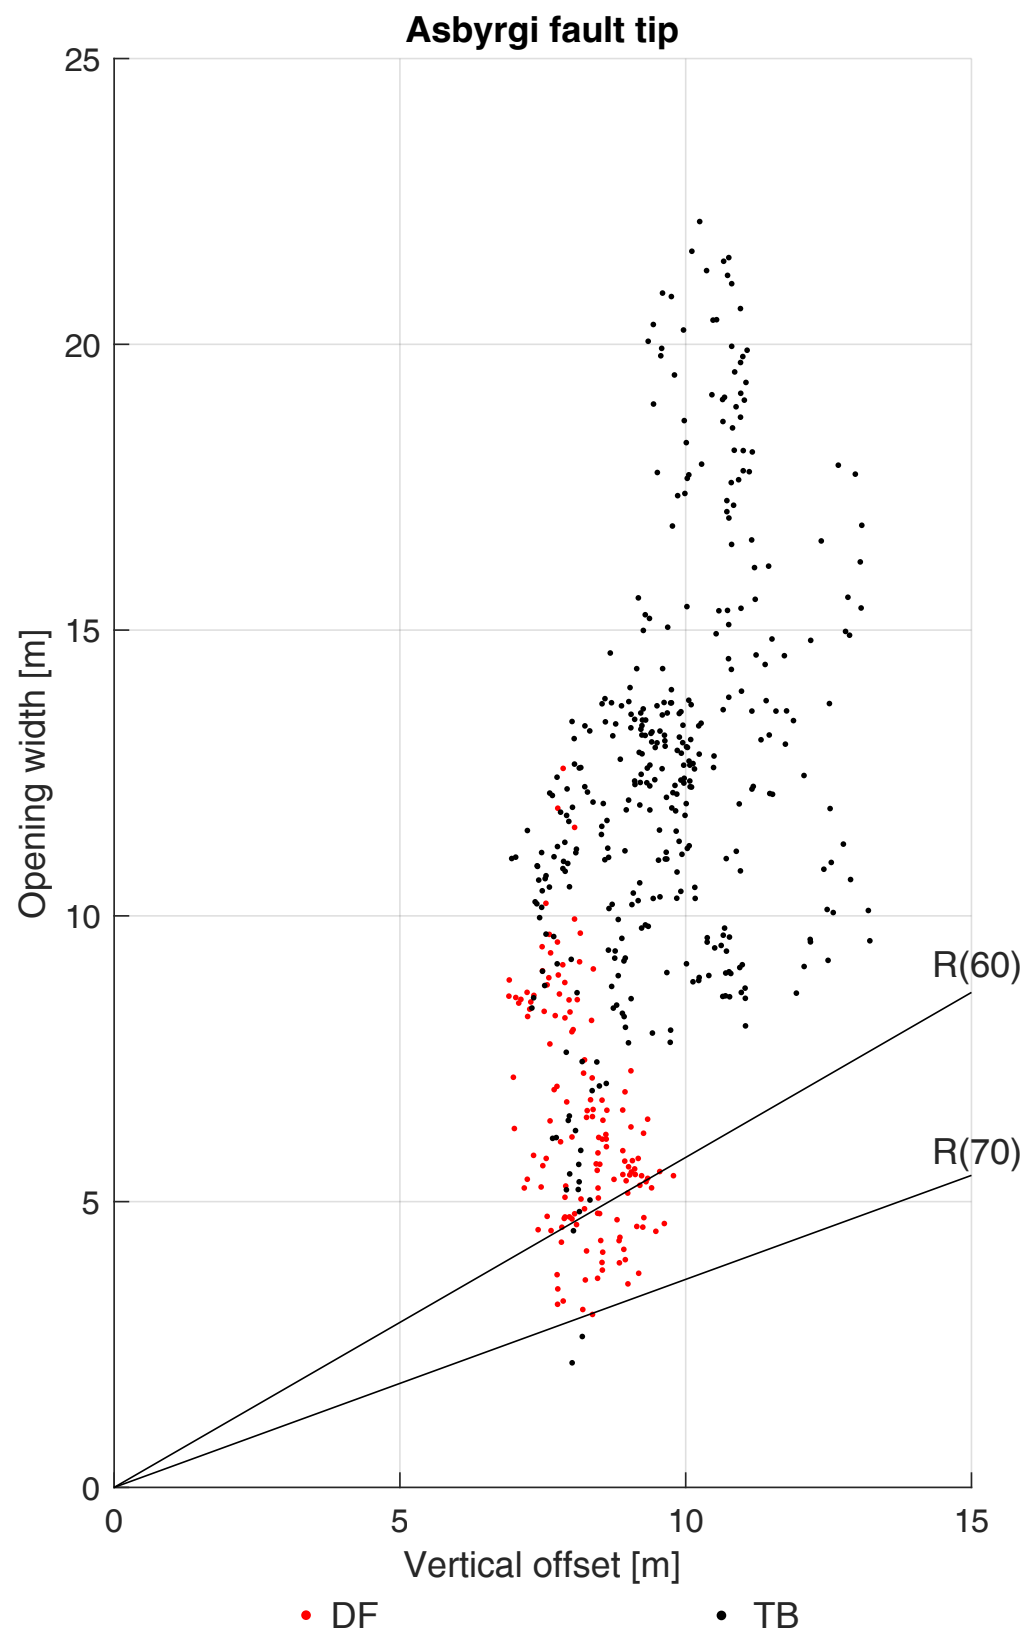

Supplement: Supplementary file 5 [file S4.2.pdf › Supplement Weismueller et al/Supplementary figures/S4.2.pdf]

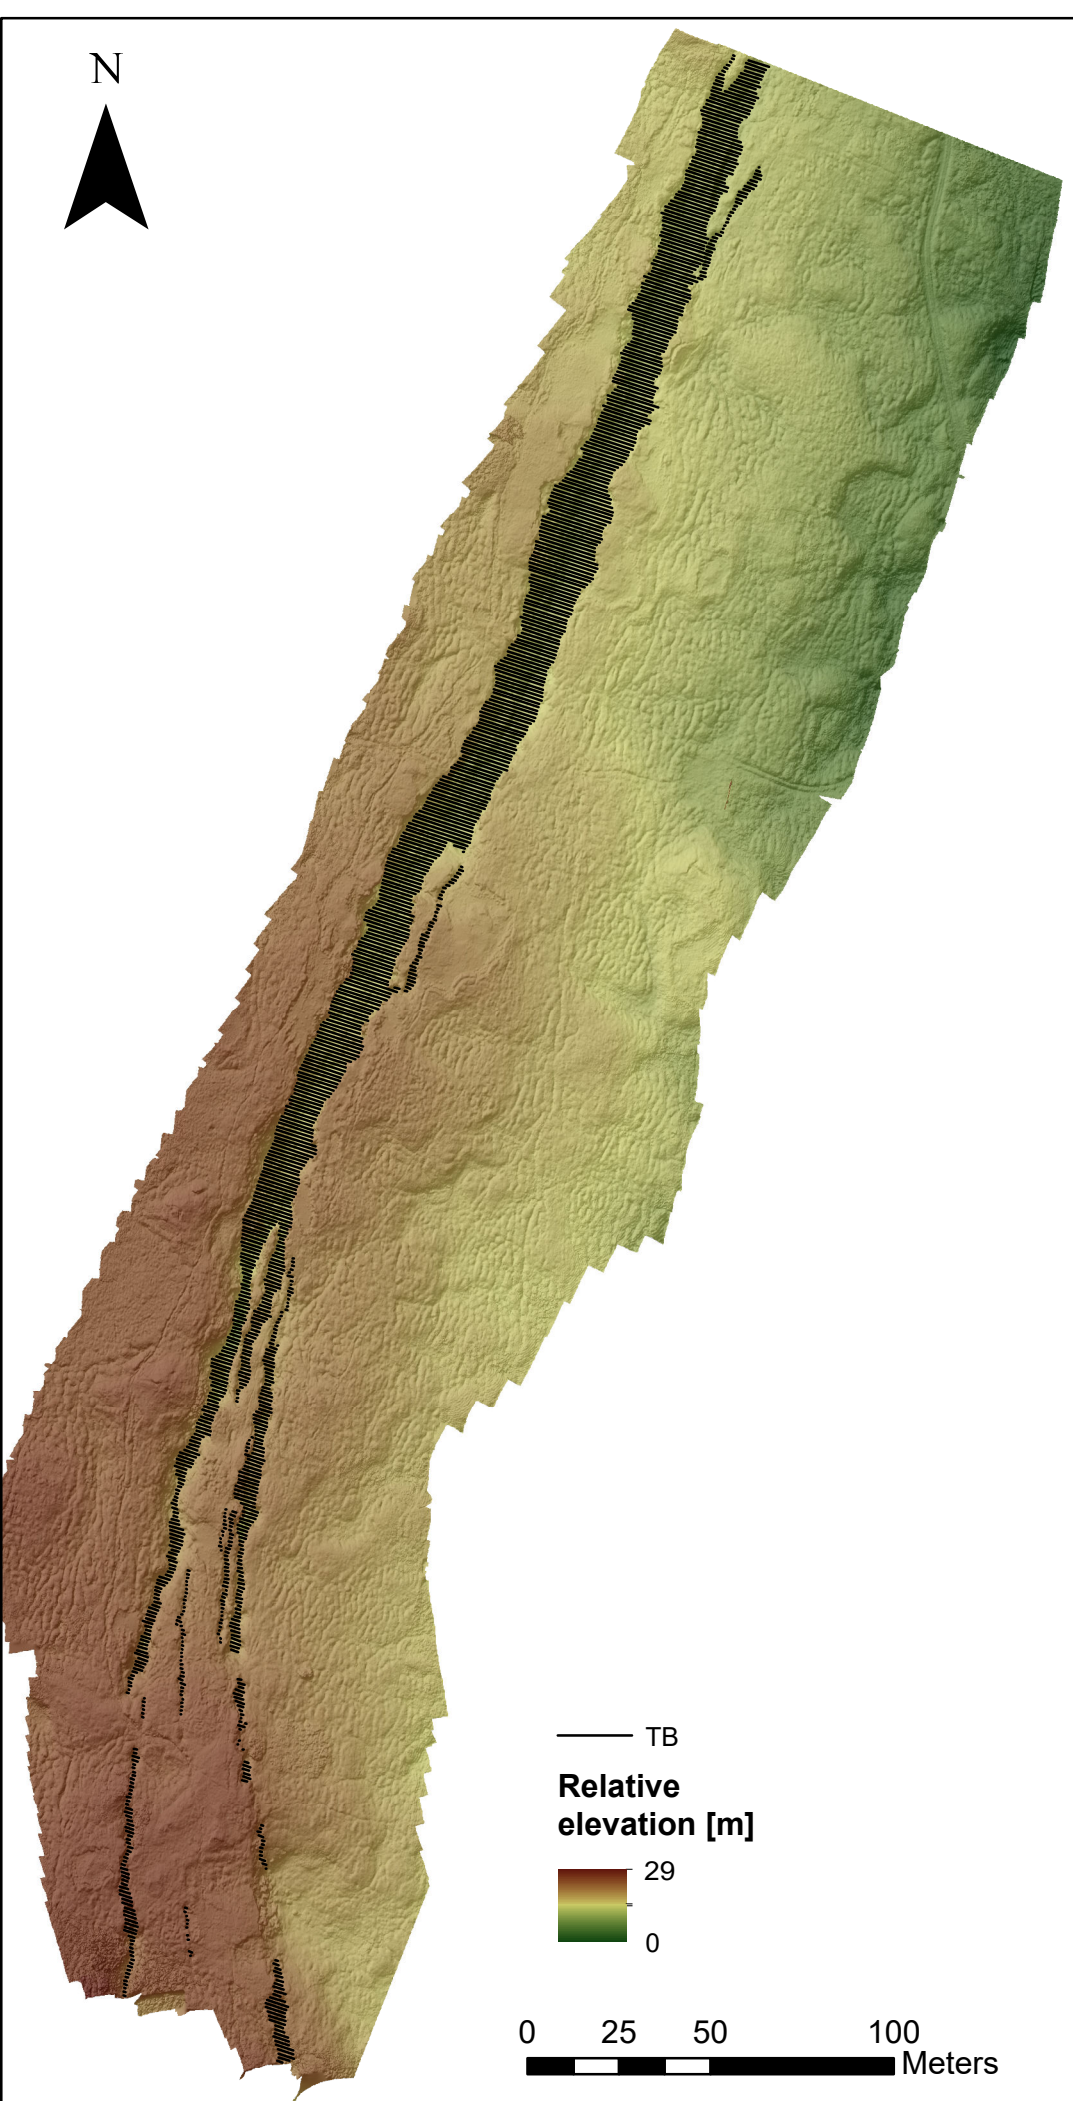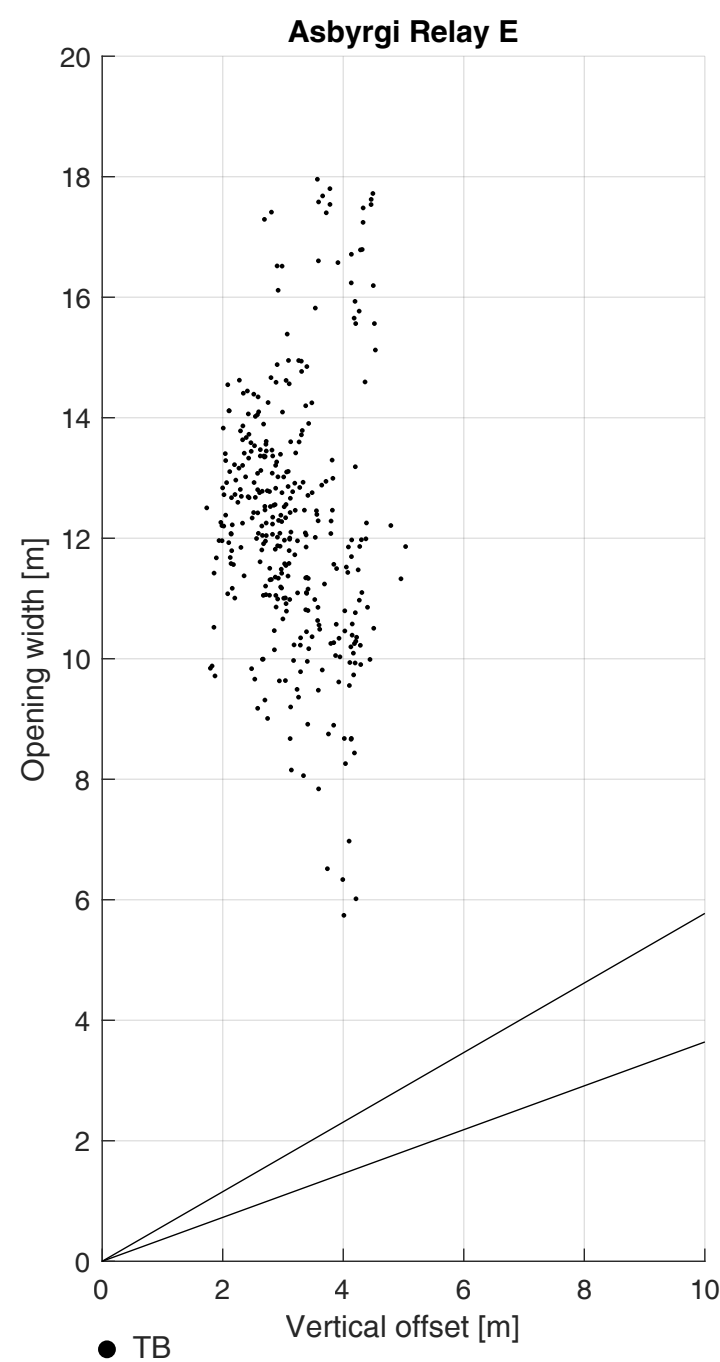

S4.3: DEM and endmember types for Asbyrgi Relay E. 16°37'58"W 66°2'32"N

Supplement: Supplementary file 6 [file S4.3.pdf › Supplement Weismueller et al/Supplementary figures/S4.3.pdf]

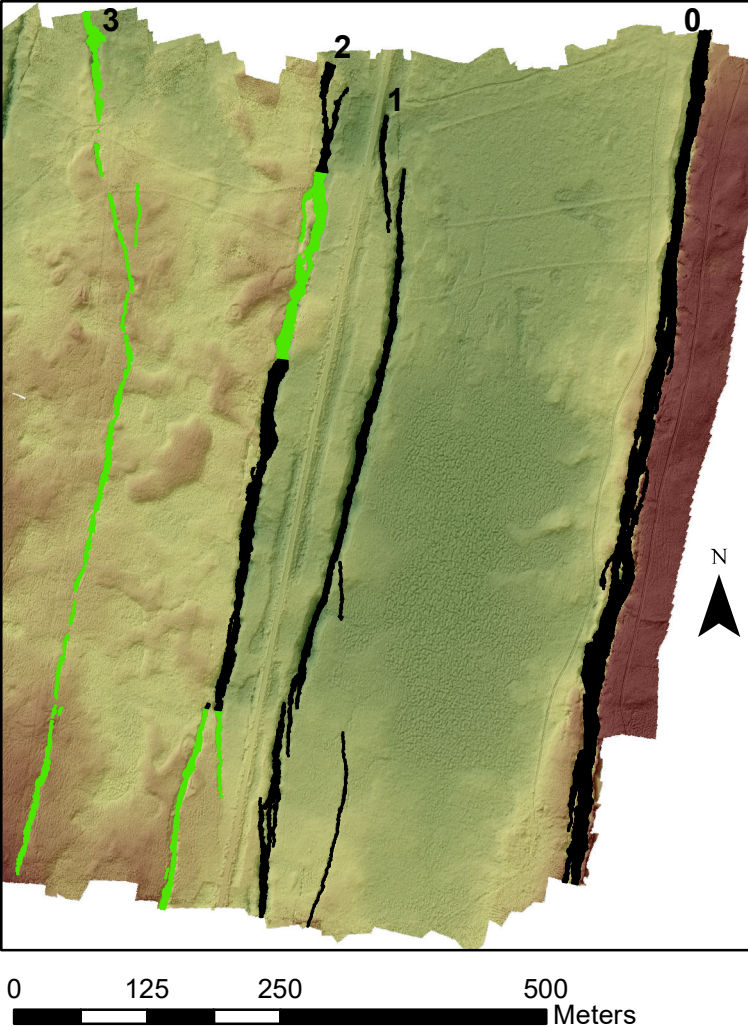

S4.4: DEM and endmember types for Asbyrgi TB.  
 16°34'37"W 66°2'23"N

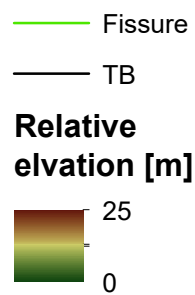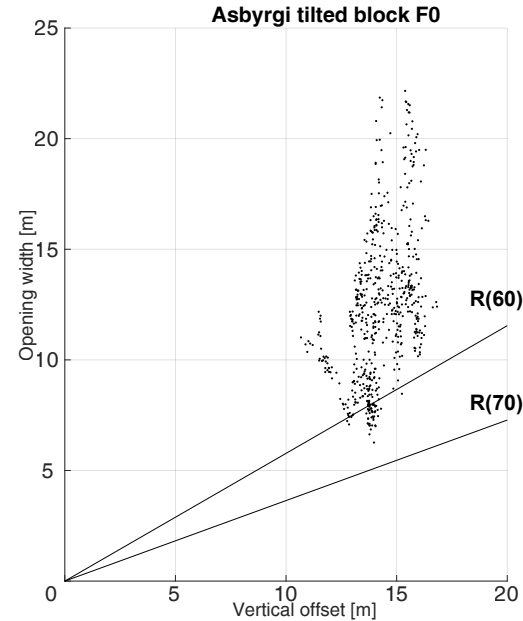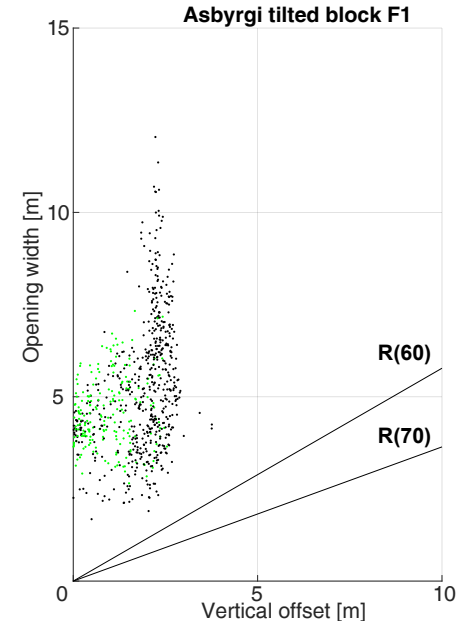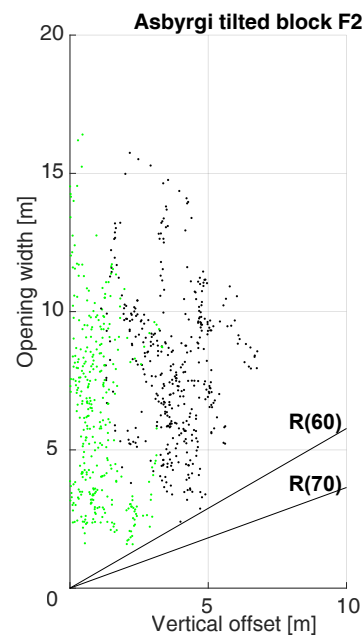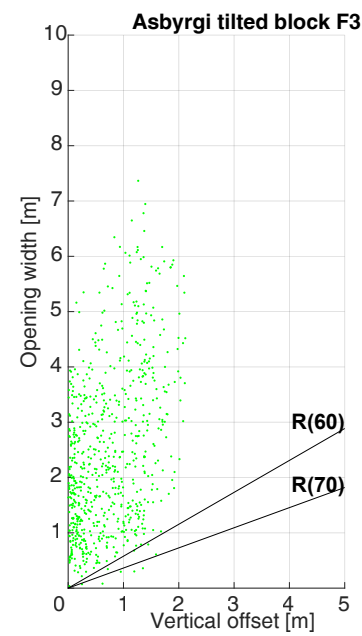

● Fissure

● TB

Supplement: Supplementary file 7 [file S4.4.pdf › Supplement Weismueller et al/Supplementary figures/S4.4.pdf]

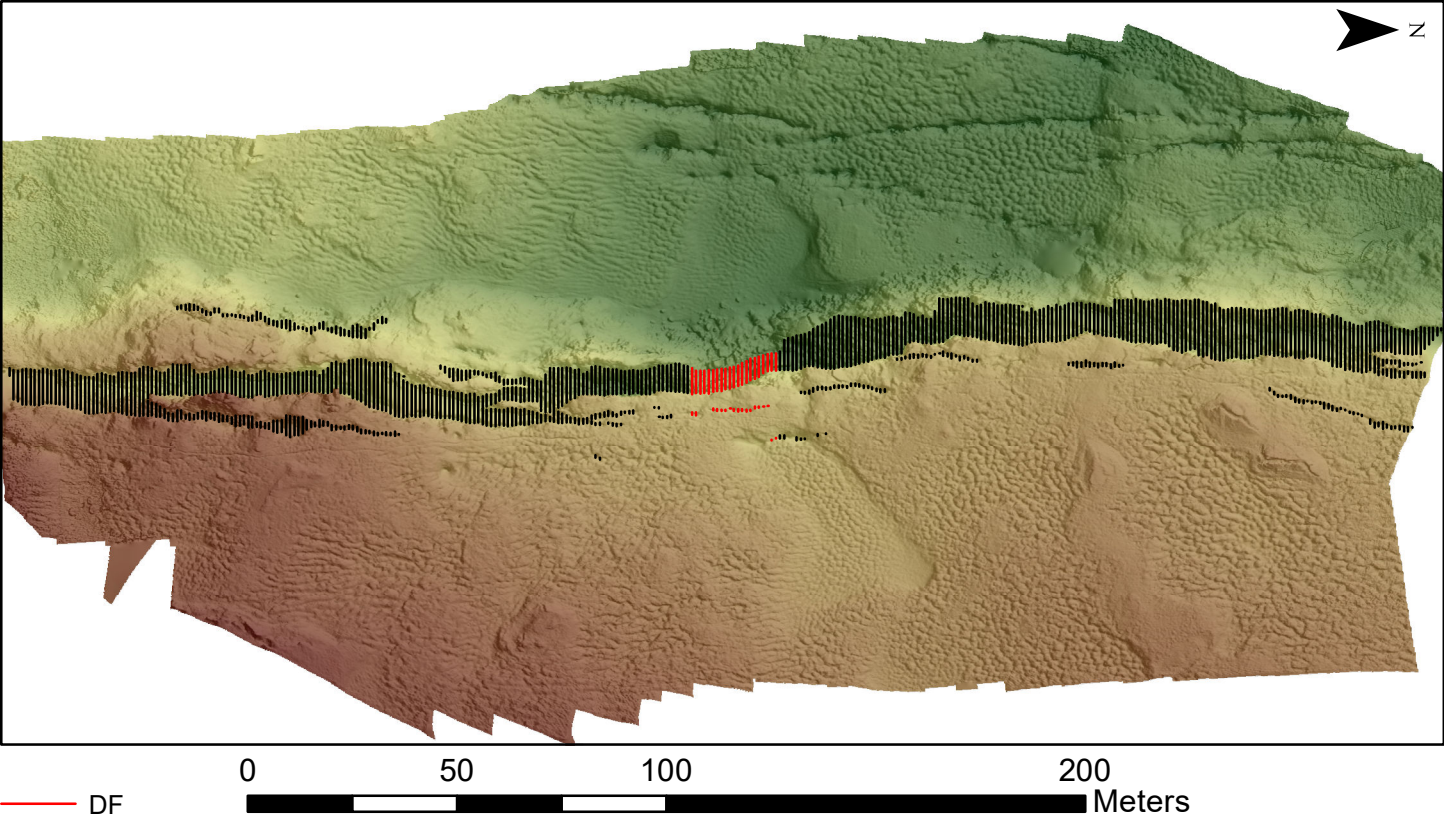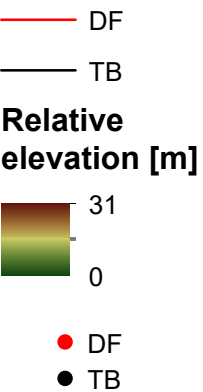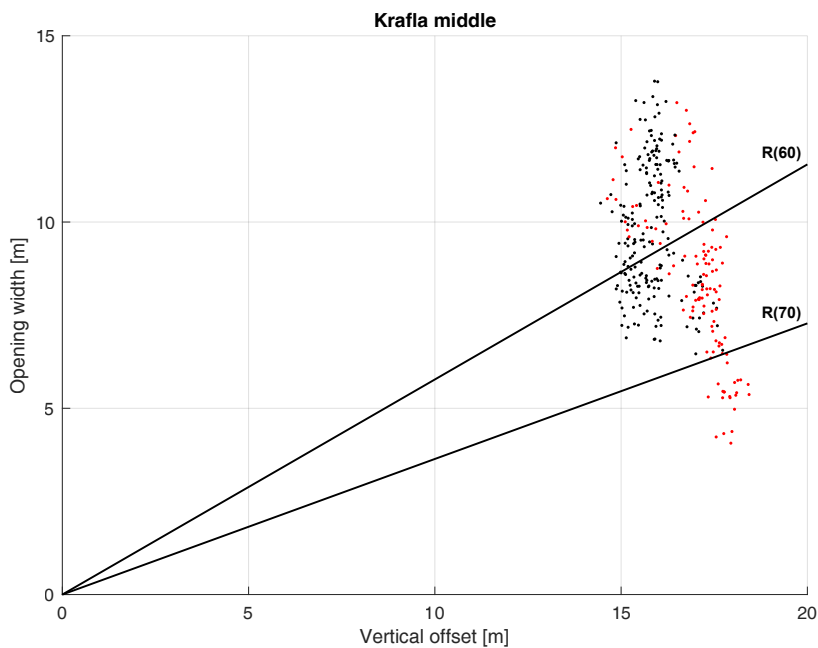

S4.5: DEM and endmember types for Krafla middle. 16°44'27"W 65°49'22"N

Supplement: Supplementary file 8 [file S4.5.pdf › Supplement Weismueller et al/Supplementary figures/S4.5.pdf]
